# Supplementary material for: Exosome proteomes reveal glycolysis-related enzyme enrichment in primary tumors
Source: Research Square preprint supplement (doi:10.21203/rs.3.rs-3341790/v1), 2023-09-19
Supplement: Supplementary file 1 [file 63ba5042d765c14a4c052d62.xlsx]

## Sheet: Table 1
Supplementary Table 2. CHMp enriched exosomal protein list
-Log(p-value)	Difference(CHMp/CHMm)	Gene name
3.82593	4.23275	VCAN
3.44666	4.14479	SERPINF1
2.85585	4.07614	COL1A2
2.36457	3.86075	COL1A1
4.01054	3.841	BGN
3.0133	3.47295	RARRES2
3.46471	3.43182	CSF1
2.95798	3.40449	PPIB
2.73073	3.3815	COL5A2
2.58498	3.11937	MMP19
3.20055	2.93929	ANGPT1
3.99248	2.85344	PTX3
2.24738	2.70881	SERPINE2
1.99924	2.70302	CA9
2.34084	2.56255	VIM
3.58622	2.52964	COL15A1
2.27977	2.5085	CALU
2.29023	2.49808	FBN1
4.07801	2.31401	FSTL1
2.03307	2.30347	CCDC80
2.43526	2.30306	DPYSL3
1.53297	2.28419	NCL
1.78353	2.27981	HP1BP3
2.57964	2.16235	LOXL2
1.64265	2.1577	SF3A2
1.90521	2.15356	LGALS1
2.31222	2.06309	DCTN2
3.15622	2.05983	LDHA
2.89802	2.03807	QPCT
3.8032	2.02736	LRP1
1.65866	2.01968	SNRNP70
3.35355	1.96527	LTBP1
1.92614	1.95087	LMNA
2.05812	1.93117	PDCL3
1.79395	1.92632	PLOD2
2.78433	1.86992	FLNA
3.31697	1.85025	HTRA1
2.45652	1.80786	DCTN1
2.38242	1.78373	PLA2G7
2.55744	1.7652	SPARC
3.04139	1.75385	COL5A1
2.56805	1.6757	PLOD1
1.35657	1.66453	NPM1
2.91254	1.64896	HAPLN3
1.36425	1.63751	LOC474472;YBX1
1.39416	1.62096	IGFBP7
1.65014	1.56498	SF3A1
2.50548	1.54214	LDHB
1.91491	1.53344	SND1
2.03959	1.50715	PKM
1.88493	1.49334	TPI1
1.57096	1.48687	ILF2
4.34878	1.47337	PLOD3
3.53521	1.46842	GPI
1.95348	1.45075	ACTN1
1.86852	1.4467	ALDOA
2.15352	1.43844	ECM1
1.79927	1.43839	CTSB
2.25806	1.42888	UGP2
1.86271	1.42595	PSMB5
2.04032	1.42018	EHD2
2.07224	1.4142	ACTR1B
1.79719	1.40594	DYNC1H1
1.82521	1.38633	PSMA6
2.24205	1.38049	LGALS3
1.59706	1.37216	SF3B1
2.30329	1.35429	TSPAN9
2.31651	1.34546	Tg;TG
3.947	1.345	HEXB
3.25898	1.3442	AHCY
1.55045	1.3262	ARCN1
1.70682	1.31151	HSP27;HSPB1
1.70855	1.31141	COPA
1.40837	1.29447	COPZ1
2.34596	1.28029	DPYSL2
1.63618	1.27508	SERPINE1
2.20006	1.26272	PSMA3
1.68023	1.2619	SF3B3
1.9266	1.25948	PSMA7
1.98526	1.25391	QSOX1
1.84159	1.2462	PSMB2
2.33483	1.22939	PSMB3
1.33172	1.22772	EIF3A
1.85366	1.22373	ENO1
2.12257	1.22152	CAND1
1.82294	1.2177	PSMA5
1.89266	1.21423	PSMB4
