# Supplementary material for: Exosome proteomes reveal glycolysis-related enzyme enrichment in primary tumors
Source: Research Square preprint supplement (doi:10.21203/rs.3.rs-3341790/v1), 2023-09-19
Supplement: Supplementary file 2 [file ac84841d6879d031a02a8380.xlsx]

## Sheet: Sheet1
Supplementary Table 3. CHMm enriched exosomal protein list
-log(p-value)	Difference(CHMp/CHMm)	Gene name
4.50638	-1.25493	PRSS22
2.29115	-1.26075	LOC100855903;YWHAZ
3.16926	-1.268	Oas2;OAS2
2.8778	-1.27204	4F2hc;SLC3A2
2.46128	-1.33093	EDIL3
2.65102	-1.3732	MARCKSL1
1.46043	-1.43425	CYR61
3.70995	-1.44055	GLTP
3.03576	-1.45499	LAMA5
2.1469	-1.46801	FERMT1
3.13904	-1.48769	PLAU
3.90979	-1.50181	ADAMTS1
2.97481	-1.58228	EPB41L1
3.56247	-1.63194	ITGA2
3.45318	-1.64834	ARRDC1
3.68963	-1.65178	LAMB1
3.98862	-1.69756	LAMC1
4.47856	-1.70555	DSG2
2.18989	-1.81427	PLAT
3.32117	-1.89074	L1CAM
3.64355	-1.91516	CTNNA1
3.59147	-1.99536	ATP1B1
3.42229	-2.02058	TGFBI
3.89388	-2.05191	TIMP2
2.83741	-2.06199	FLT1
4.05954	-2.0622	GOLM1
4.98941	-2.06523	LAMA3
2.60681	-2.07959	THBS1
4.0566	-2.08832	ZDHHC5
3.40674	-2.10154	SLC44A2
4.86274	-2.11882	SEMA3C
3.73265	-2.12986	LSR
3.83411	-2.18246	CPD
2.49868	-2.1962	timp3;TIMP-3
3.75402	-2.21808	KIAA0040
4.16475	-2.24221	PROM2
3.82913	-2.28914
4.78402	-2.29279	CXADR
3.9299	-2.35576	LAMB3
4.37118	-2.35979	VTCN1
3.51538	-2.37539	KRT19
2.96437	-2.4133	SDC1
4.48792	-2.41403	LAMC2
3.71518	-2.44618	IL1RAP
4.60387	-2.5573	GPRC5C
3.79798	-2.609	PTGFRN
5.10071	-2.62357	ST14
3.40065	-2.65256	KRT7
5.32474	-2.74797	MMRN2
5.7405	-2.79331	GPRC5A
4.428	-2.82807	AGRN
4.78762	-2.83689	SLC2A9
5.59081	-2.97119	TF
5.62838	-3.04624	FAM3D
3.94646	-3.13274	TINAGL1
2.7675	-3.19804	CLDN7
4.60217	-3.27721	INHBA
5.81454	-3.34317	TMPRSS11E
5.40085	-3.42157	S100A16
3.66525	-3.5583	EPCAM
4.41799	-3.64542	CDH1
4.34709	-3.65332	FGFBP1
4.22183	-4.03683	TMPRSS11B
3.50558	-4.14584	COL12A1
3.74734	-4.1696	S100A14
