# Supplementary material for: Exosome proteomes reveal glycolysis-related enzyme enrichment in primary tumors
Source: Research Square preprint supplement (doi:10.21203/rs.3.rs-3341790/v1), 2023-09-19
Supplement: Supplementary file 3 [file f10b6115cd7ce19bf71613cc.xlsx]

## Sheet: table1. total protein list
CHMm exosome			CHMp exosome
Reporter intensity 0	Reporter intensity 1	Reporter intensity 2	Reporter intensity 3	Reporter intensity 4	Reporter intensity 5	C: Only identified by site	C: Reverse	C: Potential contaminant	N: Peptides	N: Razor + unique peptides	N: Unique peptides	N: Sequence coverage [%]	N: Unique + razor sequence coverage [%]	N: Unique sequence coverage [%]	N: Mol. weight [kDa]	N: Q-value	N: Score	N: Intensity	N: MS/MS count	T: Protein IDs	T: Majority protein IDs
68688000	82287000	90220000	7181300	3743500	3419500				144	144	144	57.5	57.5	57.5	332.8	0	323.31	2145300000000	587	J9P6G0;F6XWS5	J9P6G0;F6XWS5
47075000	43429000	44312000	42513000	44483000	26874000				110	110	6	59.9	59.9	4.4	267.24	0	323.31	4717300000000	1307	F1P6H7;Q28252	F1P6H7
20077000	13621000	13659000	2437400	2639700	2556700				38	38	38	45.8	45.8	45.8	97.134	0	323.31	335990000000	94	F1PR26;J9NW82	F1PR26;J9NW82
16691000	20835000	21783000	6099700	5178500	3175600				54	54	16	56.1	56.1	17.6	129.61	0	323.31	656880000000	172	F1PBI6	F1PBI6
14508000	17116000	16416000	61093000	36186000	32907000			+	77	77	69	62.5	62.5	57.3	164.34	0	323.31	1799100000000	420	CON__ENSEMBL:ENSBTAP00000024146;F1P9C1	CON__ENSEMBL:ENSBTAP00000024146
12816000	10221000	10520000	4899700	6556300	6307700				22	22	20	48.5	48.5	44.3	51.96	0	323.31	749730000000	101	E2QYU2	E2QYU2
9915000	2813100	3985000	4782200	6150400	3327600			+	26	26	16	41.1	41.1	28.9	66.017	0	323.31	76126000000	44	CON__P04264;F1PTY1;F1Q0T0	CON__P04264
9836700	14998000	14928000	42994000	25855000	22428000			+	51	51	46	74	74	69.2	69.293	0	323.31	1251300000000	209	CON__P02769;CON__P02768-1	CON__P02769
9283100	7287700	8472700	3276100	6333100	5300300				24	24	24	34	34	34	88.123	0	323.31	145490000000	69	E2RT60	E2RT60
8956000	6587800	7569400	5772300	9575700	9469400				41	41	41	52.5	52.5	52.5	96.122	0	323.31	124670000000	84	F1PFG6	F1PFG6
8707700	7214500	8044900	5167700	9514600	9091400				36	36	24	69.8	69.8	51.9	70.897	0	323.31	141730000000	97	E2R0T6;H9GW49;E2RAU5	E2R0T6;H9GW49
8678200	7158000	8043300	2396600	2891600	2323900				43	43	42	32	32	31.7	181.93	0	323.31	71588000000	74	F1PCD8	F1PCD8
8124600	6091700	6773500	1032200	1026500	883550				33	33	33	23.9	23.9	23.9	216.6	0	323.31	67983000000	68	F1Q2Z6	F1Q2Z6
7537400	5314000	5337400	5880500	7419200	6886100				22	22	22	47.9	47.9	47.9	47.824	0	323.31	235280000000	61	F1PFZ5	F1PFZ5
6908700	4620400	5113600	1831000	2437400	2297400				17	17	17	43.1	43.1	43.1	53.765	0	291.73	134980000000	49	F1P8D5	F1P8D5
6590800	5475500	6246700	1812500	2080900	1751600				37	37	37	31.2	31.2	31.2	164.63	0	323.31	75555000000	68	F1PHK9;J9P4V3;F1PFL6	F1PHK9
6147100	5064800	5384900	2737800	4100000	3473200				8	8	8	46.2	46.2	46.2	17.965	0	178.96	135590000000	41	F1PEZ4;J9NVT1;F1PDG4;J9P601	F1PEZ4;J9NVT1;F1PDG4;J9P601
5920600	4391300	4929000	399890	272680	265770				16	16	16	41.2	41.2	41.2	47.305	0	266.91	77361000000	26	F1Q3B8	F1Q3B8
5777600	5379600	5875000	1660300	3380000	3433100				19	19	19	61.4	61.4	61.4	38.626	0	323.31	93684000000	39	F1P6B7;Q6JDN3	F1P6B7
5725600	7779200	8818600	9514200	10872000	7207500				81	81	15	32.2	32.2	5.1	467.85	0	323.31	207290000000	199	J9NRJ0;F1PHM5;Q6TYZ5	J9NRJ0;F1PHM5
5312900	3783300	4114300	5488500	11304000	10656000				35	35	35	74.8	74.8	74.8	59.774	0	323.31	92599000000	72	E2RQ81;J9NRN0	E2RQ81;J9NRN0
5285800	4554600	4942500	1138000	1245100	1145700				41	41	7	14.5	14.5	3.1	367.68	0	323.31	36744000000	61	E2RPP1;F1PJ02	E2RPP1
4959800	4323600	4854300	1029300	1386300	1359800				35	35	35	52.8	52.8	52.8	100.12	0	323.31	28832000000	55	E2R9S7;J9NXR7;F1PZQ3;F1Q015;F1PG43	E2R9S7
4956000	1430600	1930900	2157700	2686600	1241800			+	20	20	17	37.8	37.8	34.7	59.51	0	323.31	41526000000	31	CON__P13645;F1PYU9;CON__P02535-1;CON__P08730-1;E2R7U2;J9P4H9;CON__Q7Z3Y7;O97624;E2R1Z3;CON__P08727;E2R226;CON__Q04695;F1Q0Q9;CON__Q9QWL7;E2QS80;CON__Q7Z3Z0;E2R170;CON__P19012;CON__Q7Z3Y8;F6USG7;CON__Q148H6;CON__Q99456;A3RF35;F1PYV0;E2R150;CON__ENSEMBL:ENSP00000377550;CON__P13646-1;E2R164;CON__Q7Z3Y9;CON__Q2M2I5	CON__P13645;F1PYU9
4767600	3886200	4102700	1187200	1497400	1436300				18	18	18	19.7	19.7	19.7	129.67	0	202.4	27382000000	30	E2REA9	E2REA9
4729600	3418600	3855500	442800	388310	397880				15	15	15	36.6	36.6	36.6	47.156	0	192.3	14606000000	22	E2QW13	E2QW13
4661700	4088900	4590000	1586500	2256600	2085900				30	30	30	37	37	37	112.81	0	323.31	34904000000	52	J9NZA9;F1PBA1;F1P767;F1PL53;B3SI03;F1PJF0;B3SI04;Q28887;F1PRH6;J9P483;J9NZ73;F1P8N4	J9NZA9;F1PBA1
4657000	3699600	4346500	1325800	2049700	2002900				15	15	12	66.9	66.9	55.5	27.745	0	323.31	50353000000	33	F1PBL1;J9PAA1;J9P2E1;E2QZT7;J9P069	F1PBL1;J9PAA1
4617800	3849000	4437400	787680	1058800	1011100				31	31	31	28	28	28	152.93	0	323.31	32956000000	50	E2R830	E2R830
4262000	3521000	3147900	2062800	2965700	3103100				8	8	8	31.9	31.9	31.9	22.798	0	77.951	225970000000	29	F1PQM7	F1PQM7
4253400	4948100	4644700	6971400	10378000	10693000				19	19	19	45.3	45.3	45.3	62.21	0	323.31	391450000000	100	E2RKQ6	E2RKQ6
3914900	3203300	3510700	679510	1526900	975570				19	19	19	43.6	43.6	43.6	63.521	0	323.31	70075000000	37	F1PWE1;J9PB61;J9NXN6	F1PWE1
3909900	3313000	3657300	1124000	2140100	2008300				40	40	40	32.4	32.4	32.4	191.63	0	323.31	29650000000	53	F1PHQ0;F1PGV0	F1PHQ0
3760200	2841300	3068200	1412100	2459800	2252500				23	23	23	36	36	36	116.73	0	323.31	112530000000	71	F1Q439	F1Q439
3699800	2909000	3303500	3150500	5843800	5769700				18	18	1	61.6	61.6	6.1	42.05	0	323.31	204970000000	68	Z4YHI2;J9NWY1	Z4YHI2;J9NWY1
3669400	2238000	2522000	1672000	2537600	2199200				12	12	3	63	63	19.2	32.307	0	323.31	128740000000	38	F1PKR0	F1PKR0
3563900	2659800	2877600	3617500	7528600	7187100				28	28	28	54.5	54.5	54.5	58.576	0	323.31	64084000000	55	J9PAI4;E2RB81	J9PAI4;E2RB81
3559900	6243400	6532500	15322000	7164100	8389300			+	22	22	22	49.3	49.3	49.3	46.103	0	252.03	432570000000	66	CON__P34955	CON__P34955
3554300	5081000	5141800	18264000	9126400	7332100			+	40	40	38	63.4	63.4	61.2	77.738	0	323.31	271700000000	101	CON__Q0IIK2;CON__Q29443;J9P430;F6V1W9	CON__Q0IIK2;CON__Q29443
3544500	3692900	4129800	4729100	6571800	5819600				61	61	61	15.5	15.5	15.5	556.17	0	323.31	41868000000	87	F6XXM1	F6XXM1
3495400	1190100	1602600	1648100	2318500	1080500			+	21	19	13	40.2	37.1	29.5	65.865	0	323.31	19908000000	32	CON__P35908;F1PTX4	CON__P35908
3463500	2910300	3295800	1867900	3964300	3728200				15	15	15	44.2	44.2	44.2	50.14	0	173.63	47000000000	33	F2Z4P4;J9P9I7;Q866G8;J9NRW9;E2QW85;J9P5I0;J9NU04;J9NRT6;J9P0C2;J9NZ09;E2RK38;J9P3R3;E2R791;J9NXW5;E2RCL0;J9NRN4;J9P830;J9P051;L7N0K5;L7N0M6;J9JHJ9;E2R3K1;E2RCM6;J9PA89;J9NST1;E2R2P3;J9NZ11;E2RN27;J9P2I7;E2RJ31;H9GWV0;J9NUC8;J9NUZ8;E2RBU3;E2RER1;J9NUR3;J9NSK2;J9P2H6;J9P4M3;E2RB33;J9P878;F1Q4C6;E2QX79;J9P1R1	F2Z4P4;J9P9I7;Q866G8;J9NRW9;E2QW85;J9P5I0;J9NU04;J9NRT6;J9P0C2;J9NZ09;E2RK38;J9P3R3;E2R791
3413800	3339000	3637100	730450	872120	794250				16	16	16	27.1	27.1	27.1	85.192	0	264.13	17922000000	29	E2R0R3;D5IGF4;E2QYF5;E2R4N1;J9P5R7;F6UVQ8;E2QX94;E2R400;E2RHV1	E2R0R3
3357300	3308300	3615600	3230900	5894200	6013900				25	25	20	47	47	38.7	83.236	0	323.31	51145000000	59	E2RLS3;A0A0K2FR41	E2RLS3
3228800	2125400	2297200	2484300	6933400	5552100				14	14	14	46.4	46.4	46.4	31.249	0	166.48	54285000000	28	E2QWY6;J9P0D3;E2QWF1;J9PAX1;J9P3M6	E2QWY6
3205300	2510100	3041600	350930	214750	198630				6	6	6	26.8	26.8	26.8	28.048	0	107.8	24780000000	16	F1Q1M9;F1PM51	F1Q1M9;F1PM51
3185100	3499500	3872600	5156300	4002400	3542100			+	32	32	27	46.3	46.3	39.4	92.273	0	323.31	41482000000	58	CON__ENSEMBL:ENSBTAP00000032840	CON__ENSEMBL:ENSBTAP00000032840
3138300	4057900	4319200	16300000	8668400	7732700			+	52	52	52	38.7	38.7	38.7	187.37	0	323.31	87773000000	86	CON__Q2UVX4;F1PGM1;F1PIX8;F1P707	CON__Q2UVX4
3132800	2724200	3211100	988450	1838000	1759200				16	16	11	38.1	38.1	29	61.228	0	262.77	16094000000	23	F1P719	F1P719
3036000	2110200	2353200	474950	532160	510850				17	17	17	27.7	27.7	27.7	81.758	0	199.43	10875000000	22	A0A140T8E6;Q6VAH9	A0A140T8E6
2961800	2224500	2398500	3166200	6633900	6137200				25	25	25	62.2	62.2	62.2	57.427	0	323.31	62211000000	59	F6V0D8	F6V0D8
2920400	2358400	2628400	493200	739170	628210				10	10	10	14.5	14.5	14.5	79.927	0	212.88	14893000000	14	J9P0D9;F1PG85	J9P0D9;F1PG85
2905700	2980300	2966000	2612700	4311300	4021700				30	30	30	42.7	42.7	42.7	95.339	0	323.31	27219000000	46	F6XRY2	F6XRY2
2896400	4222800	4577900	6186300	5329400	4565200				32	32	32	52.7	52.7	52.7	91.012	0	323.31	85975000000	68	E2RLQ9;J9P5P0	E2RLQ9
2848900	2773900	2738800	3891900	7121700	7141400				59	59	59	34.9	34.9	34.9	273.45	0	323.31	54963000000	77	F1Q2F6;B9A1S7	F1Q2F6
2822300	2162800	2489800	1174700	1669700	1482700				23	23	23	31.8	31.8	31.8	112.53	0	323.31	26694000000	40	F1P8Q0	F1P8Q0
2813100	2329000	2558400	922540	1187200	1095700				16	16	16	28.9	28.9	28.9	77.983	0	231.85	12242000000	22	Q2KM16;F1PTR7;Q2KKD1;F1PTR9	Q2KM16;F1PTR7
2783100	2359800	2816500	1591200	3495200	3172300				28	28	28	45.6	45.6	45.6	99.136	0	323.31	37050000000	54	F1P914	F1P914
2739600	1889100	2085300	2851800	5666500	5010300				21	21	21	53.6	53.6	53.6	58.069	0	242.91	39526000000	39	E2RLL6;E2RPU8;J9P0W6	E2RLL6
2590000	3134600	3169600	6920400	5435600	5562500			+	21	21	20	65.7	65.7	65.7	30.276	0	294.25	145120000000	50	CON__P15497;J9P843;F1PDJ5;REV__F1P609	CON__P15497
2450600	2229700	2489900	241240	217850	247690				10	10	10	26.5	26.5	26.5	47.761	0	133.94	7141200000	14	F1Q3A2	F1Q3A2
2449300	1762600	1857800	2447000	4528800	4075000				26	26	26	64.6	64.6	64.6	60.253	0	323.31	49011000000	49	E2R0L9	E2R0L9
2421100	2653200	3295100	263720	198760	206080				15	15	12	21.3	21.3	17	91.483	0	236.52	30723000000	17	F1PAA4	F1PAA4
2414100	3083400	3367600	8136700	7852900	5739700			+	15	15	15	45.1	45.1	45.1	38.418	0	286.08	244370000000	92	CON__P12763;E2QUV3	CON__P12763
2400800	2176300	2705000	10223000	7778000	5795700				30	30	29	49.8	49.8	48.1	83.556	0	323.31	204430000000	77	G4V2B6;F1P9Z8	G4V2B6;F1P9Z8
2395400	2177700	2331600	1136700	2474100	2150000				11	11	11	16.5	16.5	16.5	76.936	0	241.23	50869000000	19	F1PTZ7;J9P423;Q28285;F1PTZ5	F1PTZ7;J9P423
2224000	1988200	2235500	1038200	2002100	1958300				8	8	8	41.6	41.6	41.6	16.686	0	75.685	26561000000	17	J9NV93;Q9MZD3;F1PK62;J9NRN6;E2RKD3;J9NS80;E2RC64;J9NXS3;E2QVB5;J9P7U8	J9NV93;Q9MZD3;F1PK62
2110900	2104700	1990300	830470	813110	593720				14	14	14	30.4	30.4	30.4	59.444	0	268.56	47302000000	30	F1PPY4;Q6SLL2	F1PPY4
2063500	1449500	1688500	989630	1334800	1266800				10	10	10	26.6	26.6	26.6	44.092	0	146.64	13729000000	17	E2RGP6	E2RGP6
2051500	2047700	2428600	743230	987880	986510				13	13	13	32.3	32.3	32.3	58.467	0	253.32	17158000000	21	X5IHJ5;F1PRC5	X5IHJ5;F1PRC5
2019500	673020	981690	1068200	1362900	871580			+	18	17	17	46.2	45.1	45.1	62.129	0	323.31	15850000000	31	CON__P35527;E2R8Q7;J9P4Q9;J9NWS3;J9P0I1;F1Q0N7	CON__P35527
2008600	1457200	1647400	894310	2357400	2180500				10	10	10	28.3	28.3	28.3	46.125	0	146.48	10780000000	12	J9P6X5;F1PLN2	J9P6X5;F1PLN2
2002200	1396500	1627700	949580	2327600	2080500				9	9	9	40.3	40.3	40.3	29.212	0	118.89	16851000000	18	F1Q0Z2;J9P4G8;F1PW37;F1PJB2;J9NT56;F1PZB9;J9NVR8	F1Q0Z2;J9P4G8
1969900	2110600	2277900	333500	319920	292810				19	19	19	28	28	28	95.677	0	323.31	22102000000	32	F1Q2N9;F1Q2N8	F1Q2N9;F1Q2N8
1934700	2113400	2223000	212820	140680	152410				8	8	8	29.8	29.8	29.8	28.934	0	73.765	8131500000	13	E2RLM9	E2RLM9
1891300	2687700	3274500	1220100	1939700	1213800				7	7	7	29.7	29.7	29.7	21.94	0	117.34	39579000000	19	J9NZ79	J9NZ79
1852600	1097600	1189400	783340	1614700	1440300				13	13	13	47.8	47.8	47.8	34.386	0	246.1	17550000000	19	F1P7B0	F1P7B0
1849400	646020	866580	903400	1075300	631560				7	7	5	17.4	17.4	13.4	49.792	0	55.218	3160800000	10	E2REU6;J9P314;CON__H-INV:HIT000015463;J9P1Z1	E2REU6;J9P314
1830600	1749300	1866200	1011900	1533300	1677800				5	5	2	32.6	32.6	15.5	21.562	0	76.538	9118100000	15	J9P730;J9NZN5;E2QU83;F1PYF1	J9P730
1793900	1247000	1434600	1952700	3768100	3183400				20	20	20	51.6	51.6	51.6	58.038	0	323.31	42975000000	48	F1Q331	F1Q331
1767100	1300200	1393000	1636700	3166900	2857300				23	23	23	58	58	58	59.158	0	323.31	34979000000	43	F1Q406;J9NS87;F6Y487	F1Q406;J9NS87
1735500	1333400	1499500	1053800	1832400	1652700				11	11	6	50.4	50.4	26.4	27.052	0	170.94	16314000000	21	F1Q0H3;F6XUK4;F1PRM0	F1Q0H3
1732800	1674600	1815700	1148400	2809200	2720300				14	14	4	41.7	41.7	14.6	50.148	0	170.98	28595000000	24	L7N0B2;A0A077LQA5;E2RNQ2;L7N0G4;J9NXT1;F1PE21;E2QTQ9;F6X9E9;F1PLM3;F1P7S1;J9P2P4;J9P0P6	L7N0B2;A0A077LQA5;E2RNQ2;L7N0G4;J9NXT1;F1PE21;E2QTQ9
1717600	1349000	1559000	641100	1040500	939250				14	14	13	18.6	18.6	17.4	108.26	0	240.89	11332000000	21	F1Q4C5;F1PX14;F1PRX7;F1PRX3;F1PYW2;E2R7J5	F1Q4C5;F1PX14
1710900	1228900	1389500	1072300	3600200	3132300				10	10	10	34.1	34.1	34.1	29.945	0	96.046	30518000000	21	F2Z4Q5;Q9XST7;J9P1R9;J9P8N5;J9PBC5;J9P7M8;J9P853;J9P6S0;E2REY9;J9P7H6	F2Z4Q5;Q9XST7;J9P1R9;J9P8N5;J9PBC5;J9P7M8;J9P853;J9P6S0;E2REY9
1710400	1349000	1614900	2201500	7621400	6461600				6	6	2	41.3	41.3	7.9	13.89	0	73.703	172630000000	25	J9P6S8;H9GWB1;J9NS47;E2RNW2;L7N0M5;L7N0M4;J9NX76;E2RNW3;J9P2Y4;L7N0M7;J9NTD9;L7N0C3;E2RH15	J9P6S8;H9GWB1;J9NS47;E2RNW2;L7N0M5;L7N0M4;J9NX76;E2RNW3;J9P2Y4;L7N0M7;J9NTD9;L7N0C3
1691400	1351300	1364900	1383700	5360200	4717100				9	9	2	35.2	35.2	11.7	21.383	0	94.405	56569000000	24	F1PX67;F1P8Z1;J9P9U7;E2R494	F1PX67;F1P8Z1;J9P9U7
1687300	912710	633070	114950	118500	92605				3	3	3	19.9	19.9	19.9	22.283	0	47.786	4010300000	4	E2R5S3	E2R5S3
1646900	1234700	1215400	468120	553950	462520				13	12	12	13.7	13.2	13.2	137.45	0	218.51	8051900000	20	F1PP89	F1PP89
1592800	1265500	1342600	1579100	3075000	2951200				22	22	22	26.6	26.6	26.6	124.61	0	310.08	28417000000	33	F1Q3V2;J9NST7	F1Q3V2;J9NST7
1592400	1804100	2005400	1477400	3254700	2442400				36	36	29	24.3	24.3	20.4	226.48	0	323.31	23703000000	48	F1P9J3;F1PJ01;J9NU82;F1PYS6	F1P9J3
1559500	1703500	1786600	1112200	2357600	2188000				54	54	54	15.1	15.1	15.1	533.58	0	323.31	20512000000	67	F1PHS5;J9NZV2	F1PHS5
1542500	1352100	1481100	1074600	1101800	1055800				14	14	14	22.6	22.6	22.6	86.586	0	153.83	7075800000	19	F1PEN6;E2RCW0	F1PEN6
1540700	1495100	1385600	1352200	2784100	2887900				5	5	5	18.9	18.9	18.9	25.614	0	48.826	45345000000	17	F1PIT4	F1PIT4
1535900	1389800	1578300	875420	1288700	1201900				15	15	9	30.9	30.9	22.4	69.422	0	256.76	10780000000	24	E2RSI6;Q6JDF7	E2RSI6
1524900	1237000	1356200	805320	1388200	1270600				10	10	10	45.9	45.9	45.9	37.331	0	165.2	13133000000	15	E2RD95;E2RRE2;E2R2S8;F1P8Q5;A9UHL9	E2RD95;E2RRE2
1517900	1715900	1910700	362700	414900	463850				4	4	4	15.7	15.7	15.7	38.392	0	76.358	11111000000	9	F1Q4F9	F1Q4F9
1513000	1305200	1597300	122710	62984	70028				4	4	4	64.1	64.1	64.1	11.421	0	73.738	5631100000	7	E2RP88	E2RP88
1493200	1036200	1260700	862960	2326900	2032200				10	10	10	33.7	33.7	33.7	32.606	0	104.07	19448000000	18	F1Q424;J9PA17;J9NU22;Q9XSV0	F1Q424
1472700	1119700	1178700	283030	313010	285290				15	15	15	24.3	24.3	24.3	96.596	0	243.46	7786400000	23	J9P7H5;E2R434	J9P7H5;E2R434
1470900	1728100	2007900	6302100	6582100	4719900				19	19	19	14.5	14.5	14.5	179.9	0	323.31	58629000000	42	F1PHX8;J9P8F7;F1PD39;F1PD36;J9NYK4	F1PHX8;J9P8F7
1458900	1079300	1083800	2025800	3313500	3495500			+	7	7	7	62	62	62	15.184	0	107.31	64135000000	19	CON__P01966;J9P9H8;J9NXL3;J9JHW7;J9JHF7;A0A5B8JID5;J9P710	CON__P01966
1455200	1036500	1168500	827240	2616000	2478600				7	7	7	43.8	43.8	43.8	17.059	0	75.881	15690000000	10	J9P425;J9P542	J9P425;J9P542
1434500	1951200	2061700	4141900	4378100	4540300			+	10	10	10	49.3	49.3	49.3	22.06	0	204.9	68039000000	27	CON__Q3SX09;CON__P02070;J9P643;A0A1K0FUE8;F1PYZ1	CON__Q3SX09
1422400	1155600	1278800	2043000	3859500	3396000				17	17	17	47.6	47.6	47.6	46.805	0	309.7	24394000000	46	F1PCH3;E2R5B2;E2RAS8;J9NVW8;F1PVJ7;Q28226	F1PCH3
1419500	1059700	1147800	1394400	2979700	2847800				21	21	5	43.5	43.5	9.8	61.242	0	266.6	44430000000	39	E2RB79	E2RB79
1390200	624730	664570	538090	687340	559190				6	6	4	39.2	39.2	25.9	21.182	0	57.347	6794800000	11	F1P7Q4;F1PYQ1;F1PW88	F1P7Q4;F1PYQ1
1389800	1054000	1212000	797840	895910	674560				8	8	8	24.6	24.6	24.6	47.705	0	104.44	9394400000	17	F1PKH0;F1PKH2;Q19KA8	F1PKH0;F1PKH2
1354200	2046100	2129100	6966700	3038100	3160800			+	24	24	24	47.7	47.7	47.7	68.587	0	307.18	41866000000	36	CON__Q3SZ57;F1PXN2	CON__Q3SZ57
1336800	1676300	1969400	1323000	1585200	1375300				15	15	15	20.6	20.6	20.6	111.83	0	186.14	12437000000	23	E2RJJ6;F1PGC4;F1PE27;F1Q3H3	E2RJJ6;F1PGC4
1333300	1048500	914700	1319000	3115800	3100400				14	14	14	55.2	55.2	55.2	35.476	0	190.19	24197000000	29	F1PTZ9;F1P7C9;Q0QET4;F1PYE8;L7N0H7;F1PFN3;J9NTU0;J9PBA3;J9P1C6;E2RNJ4;J9P540;Q9TV07;E2R8R0;J9NW97;J9P1L8;J9NWZ6;Q95LE9;J9P443;J9P6C4;J9NZ39;F1PKK4;E2RNN4;Q66N59;Q9TTK3;J9P8C2;J9NTL8;J9P980;J9P5N8;J9NS31;E2R196;F1PTC0;F1PNE9;E2RBU7;E2R008	F1PTZ9;F1P7C9;Q0QET4;F1PYE8;L7N0H7;F1PFN3;J9NTU0;J9PBA3
1318000	806530	903760	898320	2409700	1756100				8	8	8	32.5	32.5	32.5	22.591	0	64.217	17859000000	15	E2R8R8	E2R8R8
1318000	1078200	1231800	330720	391220	439210				8	8	8	28.1	28.1	28.1	46.041	0	137.42	14597000000	12	F1Q1C9	F1Q1C9
1299400	1264600	1382300	2157500	2770100	2672000				26	26	26	23.7	23.7	23.7	162.23	0	323.31	22451000000	38	F1PM26;REV__E2R069	F1PM26
1295600	1009800	1100300	1393400	795820	750610			+	15	15	15	40	40	40	52.347	0	177.16	16382000000	21	CON__P41361;E2RES2	CON__P41361
1270700	1954100	1910800	4860500	2354900	2532600			+	9	9	9	19.1	19.1	19.1	42.663	0	101.65	28005000000	16	CON__Q58D62	CON__Q58D62
1243500	983570	913020	1825200	3540600	3499800				15	15	12	26.4	26.4	23.4	74.896	0	282.39	20225000000	26	F1PBT3;J9P7A6;F1PNI3;Q28244;F6XUY6	F1PBT3;J9P7A6
1241800	1088200	1273400	569000	1111100	1016400				6	6	6	17.2	17.2	17.2	30.095	0	135.67	11091000000	7	J9P9V8;F1PLP3	J9P9V8;F1PLP3
1229500	884680	982770	462270	875400	839490				8	8	1	47	47	7.7	20.601	0	167.64	16865000000	18	E2RSF6;J9NWP6	E2RSF6;J9NWP6
1229300	798270	856310	561060	869280	525430				11	11	11	20.1	20.1	20.1	75.415	0	211.76	10596000000	18	M1VEH7;M1VKS2;F1PGR0;Q56JJ2;M1VPK3;M1V4E7	M1VEH7;M1VKS2;F1PGR0;Q56JJ2
1203200	1834900	1910100	1838600	3275200	2225100				14	14	14	36.7	36.7	36.7	55.996	0	259.3	25759000000	25	F1PPA1	F1PPA1
1196300	916660	996200	713850	2059900	1930700				9	9	9	27.8	27.8	27.8	29.597	0	94.274	29707000000	13	F2Z4Q1;J9P5V0;Q6LEP2;J9NZZ7;J9NVP3;J9NUE9	F2Z4Q1;J9P5V0;Q6LEP2;J9NZZ7;J9NVP3
1195600	1228700	1264400	1379100	2275500	2396500				20	16	16	41	33.3	33.3	72.926	0	274.93	18815000000	29	F1PGY1	F1PGY1
1171500	1193700	1245900	386600	833920	798350				4	4	4	41.6	41.6	41.6	11.387	0	59.322	9051400000	8	J9NWJ5	J9NWJ5
1164200	863950	1033400	484430	1354600	1151700				9	9	9	26.2	26.2	26.2	46.241	0	81.252	11186000000	12	E2R546;J9P0P0;J9JHV8;F1PVZ2	E2R546;J9P0P0;J9JHV8;F1PVZ2
1159800	1388800	1350900	579230	1122500	1210700				6	6	4	44	44	30.6	21.768	0	60.48	10328000000	10	F6XY66;E2RMM5;E2RLH2	F6XY66;E2RMM5
1146500	771230	812760	164640	255180	234950				11	11	11	9.3	9.3	9.3	150.72	0	89.952	4974500000	14	F1PKV5;Q9N0N1	F1PKV5
1143700	1081400	1199200	157670	143570	135870				7	7	7	38	38	38	32.669	0	167.59	7282100000	13	Q4W6L5	Q4W6L5
1143000	1170200	1094000	973650	975450	996820			+	8	8	8	48.9	48.9	48.9	24.409	0	128.11	125060000000	19	CON__P00761;A0FGS8;F1PCE8;CON__P07477;F1Q3S8;F1PVU7;J9P1Q2	CON__P00761
1139800	898370	1040800	3267200	5040100	4690800				17	17	16	49.3	49.3	46	39.798	0	203.39	53664000000	34	F1PVW0;E2RA64;J9P1U5;H9N9H3;H9N9H2	F1PVW0;E2RA64
1132600	2247700	2476200	4394200	4612300	4408700				16	16	13	42.5	42.5	34.8	45.292	0	323.31	65058000000	44	F1PUI4	F1PUI4
1126900	946180	1108400	1226400	4172600	4076800				7	7	7	47.9	47.9	47.9	10.709	0	105.77	112260000000	21	L7N0L3;J9NRV0;F2Z4N2;Q6B829	L7N0L3;J9NRV0;F2Z4N2
1124300	840460	978120	629830	2226600	1950700				10	10	10	42.3	42.3	42.3	34.287	0	111.8	22225000000	23	F1PUX4;Q9TTI6;E2RLZ4	F1PUX4;Q9TTI6;E2RLZ4
1120100	977170	1105200	1972500	3963700	3553400				21	21	21	49.9	49.9	49.9	59.657	0	323.31	47480000000	33	F1PHR2;J9NV90;H9KUV7;H9KUV5;O62755	F1PHR2
1113200	1101200	724910	2204400	1390400	1773500			+	3	3	3	42	42	42	11.202	0	52.607	14692000000	10	CON__P81644	CON__P81644
1108800	922460	1049700	437590	655630	598110				11	11	11	18.6	18.6	18.6	86.388	0	203.02	7307000000	14	O97702;F1PPG5;Q9TUN7	O97702;F1PPG5;Q9TUN7
1090500	1042400	1239600	687990	1592000	1457400				8	8	8	19.5	19.5	19.5	38.946	0	86.916	24891000000	14	E2RKW9;J9PAF9;J9P1X3	E2RKW9;J9PAF9
1080900	1013100	1269100	796720	664220	474550				9	9	9	27.1	27.1	27.1	52.937	0	132.61	13475000000	18	F1PMN4	F1PMN4
1063900	680480	674340	301860	515610	395140				7	5	5	33.9	25.9	25.9	25.553	0	107.78	2363300000	10	J9NRH5;E2QVP6	J9NRH5;E2QVP6
1054600	1362700	1428700	6060300	3457300	3368000			+	20	20	20	27.2	27.2	27.2	106.19	0	286.17	46229000000	38	CON__Q9TRI1;F1PG39	CON__Q9TRI1
1052300	899260	944510	1171100	2433300	2355400				25	25	24	24.5	24.5	23.1	138.42	0	243.87	10598000000	31	J9JHE4;E2R9J9	J9JHE4;E2R9J9
1041700	1224400	988190	511510	1219800	997590				7	7	7	24.3	24.3	24.3	29.236	0	47.639	33606000000	12	J9P4E7;E2RPA8	J9P4E7;E2RPA8
1040600	1328900	1468300	295100	367750	366910				11	11	11	11.1	11.1	11.1	140.05	0	146.77	4169900000	13	E2R2V6	E2R2V6
1039100	985280	1115400	536400	842740	814620				19	19	8	17.4	17.4	8.8	146.24	0	233.88	8393300000	20	F1PDQ4	F1PDQ4
1026400	1284700	1317400	4196200	2321200	2064800			+	11	11	9	23.5	23.5	20.9	65.19	0	138.41	34313000000	21	CON__ENSEMBL:ENSBTAP00000037665	CON__ENSEMBL:ENSBTAP00000037665
1018900	913250	1053100	923890	1763500	1766300				7	7	6	36.7	36.7	31.2	22.124	0	59.804	10545000000	12	E2RHG2;J9P7L3;E2RNL3	E2RHG2
1012400	1074000	1178500	1054300	1618900	1752800				11	11	9	49.7	49.7	45.2	32.732	0	104.1	13877000000	13	E2RC20;J9P4I5;J9P3S5	E2RC20
1009600	908730	1070900	986440	2050300	1685200				8	8	8	34.7	34.7	34.7	29.302	0	112.42	19061000000	14	E2QZT4	E2QZT4
1006100	824910	820520	1155200	2922400	2591100				23	23	23	16.6	16.6	16.6	163.03	0	211.41	10131000000	33	E2RSR5	E2RSR5
1001800	839830	1010900	377380	686250	630480				1	1	1	1.1	1.1	1.1	88.344	0.00086059	6.5698	26021000000	3	E2RBL9	E2RBL9
998470	926260	1117200	492000	639680	573710				9	9	9	12.9	12.9	12.9	108.33	0	121.65	11785000000	12	J9JHQ1;F1PE64	J9JHQ1;F1PE64
982610	861600	972450	630260	1206500	1177500				12	12	4	41.7	41.7	16	49.67	0	323.31	19065000000	19	E2QSF4;J9NVB5	E2QSF4
977510	1487500	1649900	3845400	1929700	2025700			+	8	8	8	41.6	41.6	41.6	23.182	0	100.98	26124000000	16	CON__Q3SZR3	CON__Q3SZR3
975780	1117900	1247400	3376400	4783700	3949000				17	17	17	67.4	67.4	67.4	35.589	0	305.62	118780000000	62	F1PU95;J9P2L4;REV__J9P923	F1PU95;J9P2L4
962850	1127100	1310300	642520	1170600	1082900				12	12	12	32.4	32.4	32.4	64.836	0	197.18	16235000000	22	F1PDR0;Q56JI9	F1PDR0
940490	1406600	1648000	5253600	7804400	4769600				20	20	20	33.4	33.4	33.4	86.464	0	323.31	65411000000	35	E2RCV4	E2RCV4
935440	969920	1041300	1609100	3420400	3194200				50	50	50	14.5	14.5	14.5	532.39	0	323.31	19367000000	66	F1PGY9	F1PGY9
932360	962720	1039100	2646200	2949500	2558300				22	21	21	40.8	39.2	39.2	84.715	0	323.31	43043000000	35	E2RTL4	E2RTL4
927560	683800	793090	689240	870580	746130				10	10	10	7.7	7.7	7.7	171.57	0	112.62	5158200000	11	F6X907;F1PR40	F6X907
926910	756020	896080	325170	505830	479530				7	5	5	34.7	27.4	27.4	27.833	0	77.593	3965700000	7	F1PQ93	F1PQ93
918740	588010	590810	380870	1183100	1044400				5	5	4	29.9	29.9	26.6	21.337	0	39.752	4299800000	8	J9P1D0;F1Q444;E2R3D3;J9P5U8;J9P4F7;J9NUV8;J9P774;F1PYW6;J9P101	J9P1D0;F1Q444;E2R3D3;J9P5U8;J9P4F7;J9NUV8
908540	815060	935300	697020	1163800	1070200				10	10	10	63	63	63	20.839	0	164.97	28900000000	19	E2R2K4;E2R2M7;F6XEB5	E2R2K4;E2R2M7
875960	479960	429840	440770	1717700	1256500				6	6	6	29.3	29.3	29.3	28.582	0	120.12	6539800000	9	J9NRJ1;E2RP05;J9NXV4;J9NV22;J9NUR0;J9P449	J9NRJ1;E2RP05
872060	964460	1095100	1041800	2106100	2204100				15	15	15	45.6	45.6	45.6	44.462	0	202.45	10284000000	20	E2RRC9	E2RRC9
872000	1387000	1450100	3640800	2444900	2385800			+	16	16	1	40	40	2.7	53.661	0	215.73	30922000000	26	CON__ENSEMBL:ENSBTAP00000018229;E2R5W6;F1P841	CON__ENSEMBL:ENSBTAP00000018229
847850	940070	1139000	225390	229350	241110				6	6	6	16.7	16.7	16.7	45.582	0	53.21	7364100000	8	E2RLA5	E2RLA5
844450	835130	1044600	840890	1034100	987040				10	10	10	20.9	20.9	20.9	78.747	0	297.81	10455000000	14	Q56JK3;F1PC71;Q56JK4;F1P615;Q56JK5;F1P606;Q56JK6;F1P603;Q6RH29;Q6RH28;Q6RH30	Q56JK3;F1PC71;Q56JK4;F1P615;Q56JK5;F1P606;Q56JK6;F1P603;Q6RH29;Q6RH28;Q6RH30
837170	871820	997690	1244500	2106400	1993900				38	38	38	22.6	22.6	22.6	269.76	0	323.31	11936000000	46	F1PSC2;J9P5V6;E2RSC5	F1PSC2;J9P5V6
830750	907560	1050000	2689400	1568900	1428700			+	24	24	4	17.2	17.2	3.2	192.79	0	281.88	11691000000	31	CON__P01030	CON__P01030
829940	608660	568040	396190	1225800	1080200				6	6	6	42.7	42.7	42.7	12.538	0	39.557	7239100000	10	E2QYD8;J9P9Q2	E2QYD8
827270	577560	669710	366810	960070	822580				6	6	6	25.1	25.1	25.1	23.535	0	45.101	9448300000	8	F1PI16;F6UMX6	F1PI16;F6UMX6
824750	672750	812570	991310	2057300	2022300				16	16	16	27.3	27.3	27.3	76.168	0	148.4	12932000000	18	E2RCI8	E2RCI8
822880	694920	661270	240420	359770	364550				3	3	3	24.3	24.3	24.3	16.915	0	36.643	4649700000	6	J9NZ45	J9NZ45
818900	867860	888880	1403200	2417000	2526500				14	14	14	21.5	21.5	21.5	79.142	0	140.85	14696000000	18	F1PLT8	F1PLT8
815770	883990	968460	890900	1461600	1702500				2	2	2	7.4	7.4	7.4	31.449	0	43.566	4887500000	5	F1PMP0	F1PMP0
814710	619160	705480	585260	1491700	1247600				8	8	8	27.8	27.8	27.8	29.992	0	93.556	11806000000	15	F2Z4P2;Q9XST8	F2Z4P2;Q9XST8
809920	805720	753750	703450	1687800	1609600				5	5	5	12.5	12.5	12.5	37.102	0	36.817	4416200000	7	F1PCI2;J9PB23;J9NTG7	F1PCI2;J9PB23;J9NTG7
794140	696460	820980	499980	833040	756350				6	6	6	17.8	17.8	17.8	30.631	0	174.01	22207000000	13	E2QZH1	E2QZH1
790090	801900	879000	2186000	3870300	3214400				46	46	44	28.3	28.3	27.3	280.66	0	323.31	23052000000	58	F1PWW0;E2RP26;J9P5S3	F1PWW0
787670	1128100	1238400	4130200	2013000	2030200			+	13	13	13	19.1	19.1	19.1	101.51	0	222.24	16680000000	29	CON__Q3T052;H9GWY3;H9GWY1	CON__Q3T052
783750	777450	930510	456360	800500	775580				7	7	6	33	33	25.7	23.566	0	112.45	9922800000	13	E2R5G6	E2R5G6
782340	573150	621320	551360	1714900	1427900				6	6	6	32.2	32.2	32.2	24.205	0	122.38	20338000000	12	E2RFR0;REV__E2RMS2	E2RFR0
780470	634480	693210	69531	63925	62778				3	3	3	34	34	34	11.776	0	61.06	5663300000	6	E2RP76	E2RP76
769570	792050	903090	454300	634580	627500				7	6	6	39	33.5	33.5	22.541	0	64.49	5347300000	7	F2Z4P9;J9NUV0	F2Z4P9;J9NUV0
765330	858740	850310	724770	1353000	1365200				14	14	14	35.8	35.8	35.8	49.513	0	229.83	12339000000	19	F1PPT7	F1PPT7
761900	508500	594560	283420	378480	343320				8	8	7	44.3	44.3	41.8	31.368	0	171.36	8417000000	15	E2QZC7;E2R807	E2QZC7;E2R807
755860	523210	597640	490660	903150	843870				7	7	7	15.6	15.6	15.6	54.429	0	110.37	4739300000	13	E2QXN8;E2R0N3	E2QXN8
754100	704250	788920	732770	555780	419670				108	4	4	61.7	2.4	2.4	249.14	0	187.24	130290000000	31	J9P8M2	J9P8M2
751330	834030	826570	1221100	1288000	1221800				15	15	15	32.1	32.1	32.1	63.666	0	224.28	11520000000	20	F1P8T3	F1P8T3
741340	525030	592470	223670	329490	303430				4	4	4	31.2	31.2	31.2	21.713	0	72.344	4546100000	6	F1Q1H3	F1Q1H3
736960	683870	805750	566140	729950	678220				11	11	11	13.6	13.6	13.6	118.42	0	144.06	5535300000	16	E2RMT2;F1PHH3	E2RMT2;F1PHH3
710010	558880	644560	899970	2367500	2367900				5	5	1	40.4	40.4	23.5	15.328	0	45.58	57409000000	12	E2R6K5;J9P371;F6XQ29;F1PQZ0;F1PTK7	E2R6K5;J9P371
701250	745710	758090	1184500	2166800	2119500				9	9	6	42.5	42.5	24.7	24.581	0	138.53	19433000000	13	F1PUB5;Q6QT48;J9PBH5	F1PUB5;Q6QT48
697840	617840	687050	392450	556430	542880				10	10	10	30.5	30.5	30.5	48.803	0	88.744	5236600000	11	F1P8L7;F1PWQ0;J9P1V4	F1P8L7
693670	747020	788410	493640	537570	555060				7	7	7	9.2	9.2	9.2	95.137	0	66.333	3524000000	7	F1PML2;J9NXB0;F1Q170;F1Q179	F1PML2;J9NXB0
681900	820330	859330	1964700	1449700	1213800			+	18	18	17	51.6	51.6	50.3	65.056	0	323.31	20934000000	25	CON__Q1RMK2	CON__Q1RMK2
676040	519240	540020	496660	1420200	1231700				9	9	9	37.9	37.9	37.9	35.076	0	187.4	9059100000	12	F1PLR0	F1PLR0
666900	472080	467360	560380	885290	822120				7	7	7	19.9	19.9	19.9	41.063	0	78.466	2797700000	8	E2RMT4	E2RMT4
666810	606150	708420	412380	551220	521060				9	9	8	33.3	33.3	30.2	40.562	0	232.05	14132000000	15	F1P6Q0;F1P977;E2RLG2;E2R3I0;E2R4I7;F1PPQ4	F1P6Q0;F1P977
666400	822690	567810	661480	1198100	1391600				19	19	19	22.5	22.5	22.5	116.8	0	199.25	42751000000	23	J9P4F3;F1PKR3;G8C7I1	J9P4F3;F1PKR3;G8C7I1
665780	473300	523020	328810	951670	796550				4	4	4	42.5	42.5	42.5	11.864	0	28.042	4243400000	5	J9NU88;E2QXU3	J9NU88
665340	653460	753630	513520	846710	830340				6	6	5	50.3	50.3	45.6	16.837	0	79.027	14041000000	11	E2REK6;J9NWJ7;E2R8S4;J9NWQ5;J9NXY2;J9NT19	E2REK6;J9NWJ7;E2R8S4;J9NWQ5;J9NXY2
664230	460530	498190	305580	841510	861650				4	4	4	41.2	41.2	41.2	11.423	0	48.077	4938300000	6	Q9XSU5	Q9XSU5
663060	455050	509000	394040	1192700	1098000				9	9	9	44.7	44.7	44.7	32.898	0	133.07	10404000000	16	J9JHJ2;E2RJ06	J9JHJ2;E2RJ06
661940	823220	975640	2160800	2680100	3605700				10	10	10	34.7	34.7	34.7	34.557	0	176.76	35729000000	21	E2RMA3	E2RMA3
645280	1139300	1015600	1200200	846790	858910				13	8	8	2.8	1.5	1.5	501.53	0	58.804	8126900000	9	F1P8Z5	F1P8Z5
642490	609070	683500	732850	1186600	1042600				10	10	10	5.3	5.3	5.3	273.6	0	94.679	4108100000	11	E2R4X9	E2R4X9
637170	600450	713610	301430	456370	452450				8	6	6	41.5	34.1	34.1	28.211	0	128.1	3208300000	8	J9P6N4	J9P6N4
632840	561610	628370	548450	1026700	749940				7	7	7	24.8	24.8	24.8	43.419	0	117.06	8005600000	13	F1PWC7	F1PWC7
626620	447030	519950	135690	144870	110920				8	8	8	20.2	20.2	20.2	70.862	0	94.686	4169900000	9	F1PW10;J9P2W2	F1PW10;J9P2W2
625890	685720	724640	244070	423670	458180				3	3	3	5.1	5.1	5.1	54.1	0	17.886	2792500000	4	F1PWN2;C1K5F4;F6X8D7	F1PWN2;C1K5F4;F6X8D7
620610	662970	718950	1402800	2248800	2316100				10	9	9	32.9	29.3	29.3	36.622	0	109.29	9469700000	13	E2R761;J9P3N9;F1PIB3;J9NT18;J9NVM0;J9JHZ0;J9NU05;J9NSR4	E2R761;J9P3N9;F1PIB3;J9NT18;J9NVM0;J9JHZ0;J9NU05
619350	413850	448800	528230	911840	765690				8	8	8	31.5	31.5	31.5	47.617	0	150.31	5349800000	8	F1P679;J9PAK3;F1P685;J9NWY2	F1P679;J9PAK3
610640	485950	552200	202040	298910	296380				5	5	5	14.5	14.5	14.5	39.92	0	65.709	2308000000	5	E2RPE3	E2RPE3
606750	497390	551880	366410	598720	591100				1	1	1	4.3	4.3	4.3	16.944	0.0025231	6.3532	4557400000	2	J9NTN5;J9PA69;E2R611	J9NTN5;J9PA69;E2R611
601900	464750	500000	670000	1913600	1631300				3	3	3	20.6	20.6	20.6	13.944	0	22.005	3507200000	4	J9P8R0;E2RQ80	J9P8R0;E2RQ80
600550	738330	865890	165020	461090	255670				6	6	6	15.2	15.2	15.2	41.769	0	66.789	6132800000	8	E2RAA0	E2RAA0
592120	515880	579870	283970	373210	360140				5	5	5	10.4	10.4	10.4	58.775	0	35.702	2570400000	5	E2RBB8;E2RC06;K7RW18;E2RSH8;E2RC09;F1PSB7;F1PSI2	E2RBB8
586750	700510	742770	263620	334270	373860				6	6	6	24.8	24.8	24.8	39.033	0	178.87	9025200000	12	E2RJH2	E2RJH2
582600	565730	634360	81132	86024	89927				4	4	4	19.6	19.6	19.6	40.112	0	61.657	5544700000	7	F1PHN5	F1PHN5
581400	673010	698800	1570000	1551400	1408700			+	10	10	10	21.3	21.3	21.3	70.505	0	199.59	9975300000	17	CON__P00735;E2RRM2;J9NSF9	CON__P00735;E2RRM2;J9NSF9
571770	442800	506920	570200	977970	786370				3	3	3	25.3	25.3	25.3	25.254	0	126.72	18178000000	9	F1PB66	F1PB66
568600	862570	968570	134840	123240	114990				14	11	4	30.2	26.7	12.4	50.883	0	103.33	3912000000	14	F1PRB0	F1PRB0
567790	510230	582360	407700	665550	665870				7	7	7	35.7	35.7	35.7	27.02	0	102.81	2910200000	9	F1PKI4;F1PBH0;F1PTB9;J9P6I3;E2RKS6;L7N0B7;E2RGI4;F1P9H6	F1PKI4;F1PBH0;F1PTB9
564180	642080	692080	1117100	2092600	2190500				26	26	16	35.9	35.9	23.7	102.95	0	318.42	18824000000	33	E2QY07;E2QY08;E2QUQ0;E2RIM9	E2QY07;E2QY08
561640	1046900	1182300	2801100	1440700	1600000			+	11	11	4	30.9	30.9	14.1	46.203	0	323.31	38654000000	21	CON__Q9TTE1	CON__Q9TTE1
561040	499340	554250	256310	425220	436090				6	5	5	41.9	35.5	35.5	14.439	0	49.677	5293100000	8	J9P9V0	J9P9V0
553320	357000	353690	144550	472150	425430				5	5	5	32.8	32.8	32.8	15.717	0	58.322	2461100000	7	E2R0A6	E2R0A6
550840	476650	458300	813230	1408300	1396000				10	10	2	41.8	41.8	8	29.334	0	258.06	12627000000	18	J9P9G4;J9P348	J9P9G4
548000	401810	498330	658560	548150	359930				7	7	7	33.6	33.6	33.6	45.625	0	139.89	8345200000	16	F6XL96	F6XL96
544890	648830	728940	345150	590350	663820				7	7	7	34.4	34.4	34.4	24.671	0	59.425	5402400000	10	F1PC59	F1PC59
544360	459460	495820	615680	1419700	1310500				6	6	6	16.6	16.6	16.6	52.22	0	81.631	3801800000	12	E2R1J6	E2R1J6
540980	329260	393610	225490	677410	559180				6	6	6	25.1	25.1	25.1	24.289	0	85.96	2544300000	8	E2R4F5	E2R4F5
540790	452770	528380	606660	2110500	1933700				15	15	15	24.8	24.8	24.8	77.444	0	216.35	13640000000	23	J9P6J3;F1Q3W0	J9P6J3;F1Q3W0
540100	677620	731530	225640	366670	344560				12	12	12	14.9	14.9	14.9	130.91	0	175.94	6606900000	16	F1PDP1	F1PDP1
539800	528710	577320	451010	644450	601580				12	12	10	11	11	9.4	151.56	0	154.51	4899100000	13	F1PSC1;J9NTP8;F1PPZ5	F1PSC1;J9NTP8;F1PPZ5
537970	844640	793560	82032	76788	84838				7	7	7	20.8	20.8	20.8	52.315	0	90.742	12072000000	12	E2QXH3	E2QXH3
532810	440560	525630	220160	304080	299210				5	5	3	32.2	32.2	17.5	20.745	0	79	5975400000	10	F1PPL6;F1PXB8	F1PPL6
528500	415680	484660	229700	364900	328120				8	8	4	9.8	9.8	4.6	133.85	0	92.364	2165200000	9	F1PHQ7;J9PB54;E2RF35;E2R4W3	F1PHQ7
525010	556380	638650	730260	1632700	1572600				17	17	17	16	16	16	533.97	0	182.15	8362500000	25	J9P969	J9P969
523830	428430	522550	102600	138320	130370				4	4	4	15.4	15.4	15.4	28.833	0	40.607	2919900000	4	J9P7J0;F1PMF0	J9P7J0;F1PMF0
512880	595490	595190	471650	748950	743690				11	11	11	14.7	14.7	14.7	105.69	0	181.08	3298500000	12	E2RIV1;E2RRJ6	E2RIV1
512410	423300	486070	256670	1099800	916880				7	7	7	35	35	35	24.856	0	68.677	9170600000	13	E2R9V0;J9P122	E2R9V0
502890	695160	815220	279860	385450	398390				7	7	7	20.4	20.4	20.4	57.18	0	172.08	13082000000	16	K7ZSN9;F1PPI5	K7ZSN9;F1PPI5
501380	491710	552950	969680	4137500	3926700				12	12	12	18.6	18.6	18.6	77.481	0	176.33	13753000000	21	F1Q0B0	F1Q0B0
496720	396630	415610	264870	936450	908380				4	4	4	20.8	20.8	20.8	13.739	0	29.439	3952600000	6	E2RS49	E2RS49
490560	418990	479260	325600	365120	405910				9	9	9	24.7	24.7	24.7	61.992	0	186.2	11969000000	13	J9NWL5;J9P5I6	J9NWL5;J9P5I6
481200	640900	626440	1135100	1072800	955370			+	5	5	5	12.6	12.6	12.6	54.099	0	49.035	17604000000	9	CON__Q3ZBS7;F1PUM6;Q2YF02	CON__Q3ZBS7
479910	644920	1022300	10764000	6919500	4808300				25	25	25	26.6	26.6	26.6	144.81	0	323.31	105330000000	73	F1PG08	F1PG08
476380	427050	455910	623440	1370700	1283400				12	12	12	15.7	15.7	15.7	105.51	0	117.71	4581400000	13	E2RQP6	E2RQP6
475310	453620	508010	293880	457700	441990				11	11	11	17.4	17.4	17.4	92.482	0	134.52	3455400000	11	F1PV63	F1PV63
472470	522890	588440	1711900	3807700	4597900				18	18	15	41.8	41.8	38.4	53.597	0	264.33	25932000000	22	F1PLS4;F1PGH6;A3RLY4;A0A0S1U0J7;E2RS09;A0A0S1U281;A0A0S1U0N3;A0A0S1U081;E2RE99;F6UNV5;F6UNP7;J9P010;F1PZZ3;Q8HZW3;J9P515;F1PNP2	F1PLS4
467330	410930	510090	126170	98841	93689				4	4	4	8.7	8.7	8.7	66.213	0	36.407	2819500000	5	F1PKT2	F1PKT2
465520	444810	532820	650310	907690	832430				10	10	10	13.2	13.2	13.2	114.42	0	135.21	4443000000	11	F1PY05	F1PY05
465200	375550	382520	166550	483280	424920				3	3	3	24.4	24.4	24.4	13.759	0	19.392	2735000000	5	J9NUD9;J9P9X7;J9NS00;J9P252;J9P080;J9NTH4;E2R8G3;J9P3J8;J9NYL5;J9P8A1;J9NZC0;J9NZ04;J9NZY0;J9PA41;J9P560;J9P389;J9JHT8;J9P5Y4;E2RNA5;J9PBI6;J9P8F8;J9P618;J9NSI9;F1PC48;J9PA67;J9PAK4;J9NXZ0	J9NUD9;J9P9X7;J9NS00;J9P252;J9P080;J9NTH4;E2R8G3;J9P3J8;J9NYL5;J9P8A1;J9NZC0;J9NZ04;J9NZY0;J9PA41;J9P560;J9P389;J9JHT8
462990	514320	541560	472070	835270	927520				10	10	10	58.8	58.8	58.8	20.672	0	87.659	6215100000	15	F1PAG6	F1PAG6
462030	679090	770750	2489400	1527900	1398100			+	10	10	10	12.6	12.6	12.6	99.536	0	159.9	11264000000	16	CON__Q0V8M9;H9GWG4	CON__Q0V8M9
461780	434470	481850	523430	1061400	1018200				12	12	12	40.2	40.2	40.2	42.893	0	215.37	5810200000	15	E2R5N5	E2R5N5
459640	241830	249930	246450	601610	466830				5	5	5	42.7	42.7	42.7	15.807	0	42.399	4130700000	8	J9NZX6	J9NZX6
453600	594590	606970	379630	776970	726660				2	2	2	7.7	7.7	7.7	23.723	0	11.906	2864900000	3	Q6IM72;F1PNX5;F1Q231;F1Q2B3	Q6IM72;F1PNX5;F1Q231;F1Q2B3
446050	381220	399900	647610	1181600	1109900				7	7	7	45.5	45.5	45.5	29.164	0	168.56	13006000000	17	E2RBR6	E2RBR6
444160	392380	410130	421740	756210	751320				5	5	5	31	31	31	23.283	0	48.881	3129900000	7	E2R985;J9P309	E2R985;J9P309
440640	372640	407390	114850	125990	108910				1	1	1	1	1	1	99.829	0.0041051	6.0976	1973500000	2	F6V9D7	F6V9D7
440310	470940	531970	229620	277760	346060				6	6	6	10.3	10.3	10.3	113.42	0	100.08	3856000000	9	F1Q4G4;F6X870	F1Q4G4;F6X870
437760	477410	537090	964090	666860	500790			+	13	13	12	20.1	20.1	18.8	91.215	0	116.39	8095600000	17	CON__P06868;A0A0H4NYY1;Q7M321;Q8WMR1	CON__P06868
436430	436620	523950	199430	306300	324320				8	5	5	38.1	26.6	26.6	27.85	0	82.759	8171200000	9	F1PKW7	F1PKW7
434540	555290	482670	1391000	793420	671940			+	4	4	4	24.8	24.8	24.8	24.536	0	164.49	7004500000	7	CON__Q1RMN8	CON__Q1RMN8
430390	397860	442960	471580	919330	859660				12	12	12	18	18	18	100.27	0	116.47	4278300000	14	E2RCP9	E2RCP9
427800	663920	686540	1849500	1335100	1307800			+	10	8	8	22.6	18.2	18.2	51.113	0	159	12624000000	14	CON__P17697	CON__P17697
427100	303400	312940	207950	439360	384030				4	4	4	25.6	25.6	25.6	17.676	0	38.819	2329800000	5	F1PGD7	F1PGD7
425570	460830	514860	310550	501700	507110				9	9	9	33	33	33	36.72	0	203.63	3497200000	10	E2RCY1;E2RCX9;E2QRS9	E2RCY1;E2RCX9
420580	508760	440950	237300	473110	625450				7	7	6	48.2	48.2	44	18.499	0	60.228	10148000000	10	F1PQN5;F1Q1C8;J9P0V2;J9NXU5;Q5MAR8;J9P1J5	F1PQN5;F1Q1C8;J9P0V2
419340	447900	469970	640130	2185400	2010200				9	9	9	35.7	35.7	35.7	32.619	0	175.49	15646000000	17	E2RTB1;E2R4V7;E2REX9;J9P4U0;E2RM89;E2RAD1;J9NZL0	E2RTB1;E2R4V7;E2REX9
418870	467230	508710	290110	401680	422350				8	8	8	12.7	12.7	12.7	94.23	0	85.046	3346200000	12	A0A222YTD8;F1PA89	A0A222YTD8;F1PA89
418000	280920	280700	215640	616600	513450				3	3	3	17.6	17.6	17.6	20.743	0	50.662	6446900000	6	J9NVM6;E2RL34	J9NVM6;E2RL34
417890	312840	374510	257700	389190	367690				2	2	2	18	18	18	15.835	0	48.846	4280100000	2	J9P003	J9P003
413050	333200	338610	638470	1389400	938470				11	11	11	48.8	48.8	48.8	27.385	0	139.43	15045000000	16	E2RMN2	E2RMN2
410850	330150	367460	562650	1318600	1165300				11	11	11	8.8	8.8	8.8	145.83	0	145.44	3703500000	14	F1PKF6	F1PKF6
410200	387870	434430	72519	67272	60533				5	5	5	8.3	8.3	8.3	92.141	0	47.068	2303800000	6	F1PF63;J9P9X5	F1PF63;J9P9X5
407090	363290	440130	79886	87697	78972				4	4	4	17.2	17.2	17.2	35.422	0	59.602	2106500000	6	Q9TU80;J9P8H0;F1P992;A0A3G9F1C8	Q9TU80;J9P8H0;F1P992;A0A3G9F1C8
406410	300430	342590	187220	266130	250910				5	4	4	24	21.3	21.3	25.48	0	134.7	2713300000	5	E2RP16;J9NU00	E2RP16;J9NU00
402080	255710	277300	194710	640850	403290				4	4	4	21.4	21.4	21.4	22.983	0	32.94	4803100000	6	F1PF85	F1PF85
401700	235170	261660	109440	335740	267460				2	2	2	11.7	11.7	11.7	15.572	0	11.599	1135300000	2	E2R118	E2R118
397180	574840	595230	356960	422660	456350				4	4	1	8.6	8.6	2.6	50.109	0	28.725	2086300000	5	J9P3J4;F1PAA1;J9NTW0	J9P3J4;F1PAA1;J9NTW0
396340	406970	377230	447720	1026000	1039100				12	12	11	22	22	21.2	84.515	0	154.55	5333300000	15	F1PKS1;F1PKS3	F1PKS1;F1PKS3
395580	303770	356790	513380	1733600	1483400				6	2	2	41.3	7.9	7.9	13.991	0	16.838	14216000000	4	J9P604;J9NWG3;J9NRF4;J9PAN7;J9P086;J9NZE4;J9P8B6;J9P533;J9NYU5;L7N0L5;F1P782	J9P604;J9NWG3;J9NRF4;J9PAN7;J9P086;J9NZE4;J9P8B6;J9P533;J9NYU5;L7N0L5;F1P782
393800	404910	464760	334310	652750	609720				7	6	5	9.1	7.9	7	103.93	0	105.12	3422400000	9	F6Y6T1;J9P7G0	F6Y6T1;J9P7G0
393790	287480	321340	361210	959870	853140				3	3	3	29.2	29.2	29.2	15.069	0	48.665	9721400000	6	J9NRJ3;L7N0I3;L7N0B1;J9PAP2;J9P0U8;J9NTE7;H9GWG6;F1PH35;E2R5M3;E2QWF8;L7N065;E2QSD1;E2RLG6;E2QUM5;L7N0H8	J9NRJ3;L7N0I3;L7N0B1;J9PAP2;J9P0U8;J9NTE7;H9GWG6;F1PH35;E2R5M3;E2QWF8;L7N065;E2QSD1
393010	628230	701820	137190	199060	185060			+	10	5	3	18.5	11	6.9	54.988	0	71.263	3743400000	10	F1PW98;CON__Q9H552;F1PQI2;F1PCM6	F1PW98;CON__Q9H552
390560	233240	138840	255600	566560	519860				18	2	2	41.2	2.3	2.3	53.096	0	21.514	800600000	4	F1PDX9	F1PDX9
388570	375280	400840	362940	422810	382600			+	6	6	6	9.8	9.8	9.8	68.886	0	39.66	2167200000	6	CON__Q28065	CON__Q28065
387930	339770	346320	622380	1043300	971180				6	6	6	27.6	27.6	27.6	27.386	0	57.572	6876900000	9	J9P849;E2RKR4	J9P849;E2RKR4
385470	364740	371180	188110	288470	267870				11	11	11	25	25	25	60.995	0	127.58	3388800000	13	E2QUU5;J9NYE6;J9NV23;J9PB46;J9PAK1	E2QUU5
384840	413510	506490	96629	75516	82362				8	8	8	11.5	11.5	11.5	129.32	0	140.28	3545300000	12	F1PFM5	F1PFM5
380420	341620	364250	175290	251910	198140				3	3	3	3	3	3	134.94	0	45.472	939980000	3	F6V9R9	F6V9R9
378010	348640	357770	557420	1040100	1023100				8	8	8	60.7	60.7	60.7	20.035	0	120.46	12379000000	10	E2R4H4	E2R4H4
377130	255580	259730	253740	692370	575530				5	5	5	26.6	26.6	26.6	18.431	0	32.581	11892000000	7	F2Z4N5;J9P7F5	F2Z4N5;J9P7F5
375960	382820	406850	742430	1365200	1019600				7	7	7	22	22	22	29.505	0	48.561	10874000000	10	E5Q8W5;F6PME1	E5Q8W5;F6PME1
374590	458100	497560	105080	200600	194880				1	1	1	4.4	4.4	4.4	17.894	0.0079936	5.8604	3615900000	1	J9JHV7	J9JHV7
368280	392890	335750	384600	1548500	1381300				4	4	3	17.5	17.5	11.2	15.128	0	23.047	35534000000	4	E2RNB0;J9P2B7;F1PFZ6;E2QX34;L7N0D9;F1PFZ7;J9P6M9;J9P664;J9P5B1;J9P0L5;J9NRH7;J9JHP2;F1P790;F1P7D1;J9NZY9;J9P0B2	E2RNB0;J9P2B7;F1PFZ6;E2QX34;L7N0D9;F1PFZ7;J9P6M9;J9P664;J9P5B1;J9P0L5;J9NRH7;J9JHP2;F1P790;F1P7D1;J9NZY9;J9P0B2
367810	359730	301890	135270	253930	271460				3	3	3	36.7	36.7	36.7	11.067	0	80.406	2059700000	5	F1PFF2	F1PFF2
366370	365520	436170	265320	439500	421120				12	12	12	9.4	9.4	9.4	205.04	0	103.34	4018100000	15	F1P9S5;J9NRH0	F1P9S5
365600	338170	372310	46675	40102	43628				3	3	3	18.1	18.1	18.1	24.434	0	24.555	907040000	3	F1PTX8;J9PAT5	F1PTX8;J9PAT5
363650	450910	599390	67658	70874	54733				2	2	2	6.3	6.3	6.3	37.711	0	36.837	2988100000	3	J9NTX8	J9NTX8
361220	317330	331500	194150	394880	402420				3	3	3	15.1	15.1	15.1	24.488	0	25.887	1549700000	4	J9JHN1	J9JHN1
361180	547810	548550	2163000	1284000	1234800			+	4	4	4	21.7	21.7	21.7	26.133	0	117.35	28647000000	14	CON__Q3Y5Z3	CON__Q3Y5Z3
360360	292130	347970	385720	554640	490860				7	7	7	14.4	14.4	14.4	73.16	0	104.74	3738900000	12	F1PB20	F1PB20
359690	256000	280150	157680	213160	192200				9	9	9	13.7	13.7	13.7	98.843	0	124.01	1410300000	11	J9NTN8;E2QXM7;E2RSE2;F1PBL8	J9NTN8;E2QXM7
355350	317940	279550	306660	908210	872360				9	9	9	27.6	27.6	27.6	51.453	0	108.95	3630500000	14	E2QZ50	E2QZ50
353980	333780	336570	528780	936310	875640				5	5	5	20.5	20.5	20.5	25.474	0	63.608	6522300000	9	E2R0B6	E2R0B6
353540	304930	334680	423530	747470	681600				8	8	2	17.1	17.1	2.8	70.67	0	110.51	2664900000	10	J9P326;E2RQC8;E2RND1;F1PQV8	J9P326;E2RQC8
350630	367210	422970	1210500	1803000	1485700				11	11	11	9.4	9.4	9.4	170.35	0	99.418	8471000000	18	F1PLA1	F1PLA1
348210	549380	711350	286890	300570	268600				5	5	5	10.9	10.9	10.9	40.55	0	99.531	4316800000	10	F1PXX5;J9P8A9	F1PXX5;J9P8A9
347540	290790	315130	230890	483640	447580				6	6	6	21.2	21.2	21.2	43.893	0	84.04	2678200000	7	H9GWA4;E2R7F3;J9NYF6	H9GWA4;E2R7F3;J9NYF6
347110	611150	643930	123320	119550	121300				2	2	2	13.3	13.3	13.3	22.091	0	43.019	6922400000	3	E2RNC2;E2RBN4;L7N0I6	E2RNC2;E2RBN4;L7N0I6
346970	368930	422350	238800	309680	286960				12	12	12	23.6	23.6	23.6	84.125	0	119.13	3879400000	14	E2RKC6	E2RKC6
343200	325940	381110	105040	144860	161180				3	3	3	26.6	26.6	26.6	19.814	0	43.937	929680000	6	F6Y4A3	F6Y4A3
341490	372040	418920	1008300	635730	572330			+	9	9	9	7.8	7.8	7.8	188.74	0	98.658	4345300000	12	CON__Q1A7A4	CON__Q1A7A4
340660	486040	519760	77626	85648	92658				9	7	6	19.5	17.3	15.5	43.884	0	56.933	1688400000	7	F1Q0N9;CON__P19001;A7XZY9	F1Q0N9
338910	384430	395170	417090	698110	714590				12	12	12	20.5	20.5	20.5	97.226	0	186.21	3078900000	16	F6X637	F6X637
335160	332480	358700	535010	667700	640060			+	9	9	9	5.2	5.2	5.2	248.98	0	97.877	2095600000	9	CON__Q28107;F1PN98	CON__Q28107
334740	197170	192200	125250	221560	181330				2	2	2	10	10	10	27.907	0	15.417	1398600000	4	F1PNT6	F1PNT6
328210	378690	382650	292770	980610	1069000				3	3	3	11.4	11.4	11.4	29.749	0	51.268	3085200000	5	F1PA19	F1PA19
328100	232380	248510	172100	378890	320360				3	3	3	22.2	22.2	22.2	15.79	0	40.32	1471600000	3	J9PAU6;J9NRY1;E2R4E5;J9P4R5;J9NZA6;J9NUW6;J9NZ81;E2R456;J9NTK5	J9PAU6;J9NRY1;E2R4E5;J9P4R5;J9NZA6
327530	261780	278440	212220	891370	796450				4	4	4	32.1	32.1	32.1	15.393	0	57.211	4411900000	8	F1PAJ4;J9P1I2;A0A0A0MPE1;J9NSG7	F1PAJ4;J9P1I2;A0A0A0MPE1
325730	242540	249240	188040	656240	538460				5	5	5	28.9	28.9	28.9	20.676	0	102.4	3061700000	7	A0A0A0MPE0;F1PUJ6;F1PHL1;J9NW89;F1PJT3	A0A0A0MPE0
325400	327980	356050	56279	73739	67707				3	3	3	10.3	10.3	10.3	30.826	0	20.666	1432500000	3	F1P8R9;F1PLE7	F1P8R9;F1PLE7
325090	358900	428070	68095	68859	70360				8	8	8	8.9	8.9	8.9	130.94	0	164.83	2538700000	10	Q867A2;F1PG66	Q867A2;F1PG66
323310	306670	354970	337030	621300	582690				7	7	3	23.2	23.2	10.6	46.153	0	111.08	4523500000	9	J9NY67;F1P895;J9NU36	J9NY67;F1P895;J9NU36
318850	312030	349020	397220	801430	781580				10	10	10	29.9	29.9	29.9	47.463	0	93.343	6260600000	14	E2RJ26	E2RJ26
318630	210210	208080	179140	727440	651360				6	6	6	36.8	36.8	36.8	22.876	0	87.467	8914400000	12	E2RIQ8	E2RIQ8
318390	281450	335080	132940	223120	202970				5	5	3	30.1	30.1	15	23.54	0	58.157	2847000000	5	J9NX28	J9NX28
317220	382760	397920	393770	685040	688100				6	6	6	12.7	12.7	12.7	53.747	0	43.979	2794300000	8	F1PCQ3	F1PCQ3
315510	270680	308550	144320	283810	293500				2	2	2	12	12	12	14.805	0	11.883	729570000	2	E2R507	E2R507
314880	412070	474850	697110	1402700	1254300				9	9	9	35.1	35.1	35.1	37.685	0	98.996	9488800000	11	E2R6Q7	E2R6Q7
314370	338730	345150	559790	1126900	1130200				5	5	5	31.9	31.9	31.9	28.534	0	107.41	7908200000	11	E2R3R2	E2R3R2
313520	321100	374320	284700	935790	862000				1	1	1	5	5	5	20.57	0	11.597	3238800000	2	E2R8A8	E2R8A8
312120	354540	533730	5808000	9180400	7361600				21	21	21	8.6	8.6	8.6	369.5	0	323.31	50802000000	44	F1PGL1;J9P884	F1PGL1;J9P884
310480	290110	315860	256720	502730	492500				4	4	4	15.8	15.8	15.8	35.731	0	39.694	2202800000	4	E2R002	E2R002
307710	253700	288530	347900	684130	631180				9	9	9	14.8	14.8	14.8	84.324	0	62.507	1736800000	9	E2RR68	E2RR68
306610	343550	435820	532210	2397900	1658400				9	9	5	28.4	28.4	16.1	38.819	0	226.45	11892000000	13	E2QYP1;F1Q3G7;F1P645;L7N0C2;E2R5N6;L7N074;E2RJS4;F1PVY3;E2RF95;L7N066;F1PD20;F1PQB0;E2RJI3;E2RF37;E2REM2;J9P0Y4;F1PD64;F1Q2T4	E2QYP1;F1Q3G7;F1P645
305950	252680	286520	156340	254450	225190				5	4	4	43.4	40	40	20.082	0	57.935	2621000000	6	E2RHL4	E2RHL4
304660	254360	272230	122050	200720	197730				3	3	3	9.5	9.5	9.5	34.225	0	19.79	1666000000	3	F6X9C1	F6X9C1
303890	293810	243840	39498	27001	32941				2	2	2	6.3	6.3	6.3	35.387	0	12.544	690340000	2	E2RJT2	E2RJT2
303700	434720	448130	1278600	575780	652120			+	7	7	1	17.7	17.7	2.4	46.941	0	56.241	8666300000	10	CON__A2I7N3	CON__A2I7N3
303680	321390	342340	320390	541470	545490				5	5	5	11.4	11.4	11.4	50.163	0	36.417	7703800000	5	E2R574;J9PAV3;J9P5B4;J9NZS4;J9NZK9	E2R574;J9PAV3;J9P5B4
302950	226350	245520	156700	249640	234570				13	13	13	15.1	15.1	15.1	125.9	0	131	4783300000	17	F1PH57	F1PH57
302290	265430	300370	504100	1025800	1040100				5	5	5	24.1	24.1	24.1	26.714	0	65.752	3998700000	7	A0A346M2B2;A0A0A0MPD0	A0A346M2B2;A0A0A0MPD0
301720	468360	558930	669360	904030	792280				9	9	9	32.3	32.3	32.3	46.097	0	179.39	22814000000	22	J9NZK5;A0A411DZC1	J9NZK5;A0A411DZC1
301190	262310	292250	223050	408840	342040				10	1	1	26.3	4.2	4.2	42.019	0	9.5478	38370000000	4	F2Z4N7;F2Z4N8;F2Z4N0;F1PVC1	F2Z4N7;F2Z4N8;F2Z4N0;F1PVC1
301080	431760	497010	1301900	778020	797220			+	16	1	1	39	1.7	1.7	53.341	0	7.4313	6466100000	3	CON__Q3MHN5	CON__Q3MHN5
299400	399440	464260	1602700	622120	599570				7	2	2	10.7	4.8	4.8	68.606	0	52.323	85500000000	11	F2Z4Q6	F2Z4Q6
298140	221650	259400	193340	679410	558190				4	4	4	43.7	43.7	43.7	13.373	0	42.928	5749800000	6	J9P9Z7	J9P9Z7
296550	424470	446430	1325200	873220	711340			+	9	9	9	34.4	34.4	34.4	43.9	0	211.9	9068600000	20	CON__ENSEMBL:ENSBTAP00000024466;CON__ENSEMBL:ENSBTAP00000024462	CON__ENSEMBL:ENSBTAP00000024466;CON__ENSEMBL:ENSBTAP00000024462
294140	262490	300070	198140	257580	240410				5	5	5	40.2	40.2	40.2	21.229	0	39.754	2648800000	6	F1PHV7;F1PXZ9;J9P550;Q29405;O62857;O62639	F1PHV7;F1PXZ9;J9P550
292820	285530	320280	150780	262770	270820				8	5	4	60	38.9	31.1	20.527	0	53.023	1884700000	7	J9P5N6	J9P5N6
290120	253820	277520	416760	558010	531730				12	12	12	7.3	7.3	7.3	243.55	0	129.58	2378200000	13	E2RAV2;J9P266;F1PJF3	E2RAV2;J9P266
289740	298320	344210	467440	822410	874960				8	8	8	50	50	50	28.822	0	125.21	5856500000	14	E2RT65;H9GW55	E2RT65
289070	316410	375770	431200	1392000	1190700				10	10	10	14.1	14.1	14.1	95.555	0	96.257	4451200000	12	F1PGB6	F1PGB6
285250	291720	389260	2221700	5479000	3159400				11	11	11	49.1	49.1	49.1	23.775	0	223.11	57462000000	22	F1PLV2;J9NVL9	F1PLV2;J9NVL9
284790	254400	287230	388290	716110	653350				9	9	9	28.1	28.1	28.1	50.227	0	171.51	3515300000	10	E2RQC9	E2RQC9
284580	123170	99700	70503	169930	134760				2	2	2	9.5	9.5	9.5	12.427	0	11.616	636610000	3	J9P6P5;A0A075B5H7;J9P9C5;J9NU47;J9P1B4	J9P6P5;A0A075B5H7;J9P9C5;J9NU47;J9P1B4
283270	269770	332180	205320	238930	239800				17	12	7	34.1	27.1	16.4	70.597	0	113.98	4584700000	14	G1K268;G1K267;O77483	G1K268;G1K267
283180	421780	295840	264500	298220	262760			+	40	2	2	40.3	1.6	1.6	129.39	0	14.833	1015100000	2	CON__Q28194;J9NZF3;D5IGD0;D5IGC9;F6UTF3;E2QYM7	CON__Q28194
282530	425910	493370	637910	506500	455780				1	1	1	3.2	3.2	3.2	42.126	0	12.569	7156600000	3	J9P5W4;J9NYM5;E2RK60;J9PBP3	J9P5W4;J9NYM5;E2RK60;J9PBP3
280260	276560	281280	320110	549980	562960				9	9	9	24	24	24	63.154	0	111.45	4443200000	9	F1PE28	F1PE28
279150	296820	317020	340020	766740	827160				5	5	5	19.3	19.3	19.3	30.794	0	42.247	4199200000	7	F1PBZ4	F1PBZ4
278280	385010	701070	12421000	5243900	3536000				27	27	27	23.8	23.8	23.8	139.1	0	323.31	65192000000	57	F1Q3I5;CON__Q862S4;Q9GLN4;E5G723;O62801;O77753;F1PS24	F1Q3I5
277220	215520	250530	89371	94671	88474				5	5	5	9.2	9.2	9.2	98.199	0	66.517	1259600000	5	B2KN54;F6PLL5	B2KN54;F6PLL5
274980	242370	290100	122990	211350	201410				4	4	4	5.5	5.5	5.5	126.71	0	54.996	882080000	4	J9PAF7;F1PTY0	J9PAF7;F1PTY0
272590	259600	324650	533520	2234000	1791400				3	2	2	25.8	18.8	18.8	13.509	0	16.294	7979900000	5	J9P3D2;F6X834;Q28246	J9P3D2;F6X834
272040	227410	223600	134800	252350	251530				3	3	3	14.7	14.7	14.7	25.908	0	20.2	1112300000	3	G1K288;J9NWA7;E2RLX7	G1K288;J9NWA7
271480	265500	321370	152920	226390	220520				10	8	5	27.6	23.4	16.6	53.181	0	156.65	3795800000	12	F1PSK6	F1PSK6
270210	251180	275150	157910	263960	259280			+	4	4	4	46.9	46.9	46.9	10.625	0	61.059	3550200000	5	F1Q3Y0;CON__P02584	F1Q3Y0;CON__P02584
267200	249880	277970	169450	323830	328800				3	3	3	27.9	27.9	27.9	16.832	0	50.082	2560100000	4	F1Q264;J9NXY1	F1Q264;J9NXY1
265720	221180	250120	80183	93689	89551				2	2	2	5.4	5.4	5.4	57.975	0	29.617	804720000	3	F1PWL4	F1PWL4
265350	219850	248140	311350	329050	336980				9	9	8	11.7	11.7	10.4	110.68	0	82.46	2069800000	10	F1PV82;J9NXT6	F1PV82;J9NXT6
262940	299010	315490	366300	1303500	1081900				8	8	7	25.4	25.4	23.1	38.388	0	110.91	4605200000	11	E2RIX2;J9NZR9	E2RIX2
260050	256660	283840	105790	114880	114680				5	5	5	23.8	23.8	23.8	33.044	0	50.761	2550900000	5	E2R8K5;F1Q4G6	E2R8K5;F1Q4G6
258790	465720	545600	172790	410350	453110				1	1	1	1	1	1	83.141	0.0008643	6.6119	5923000000	4	F1PEQ0	F1PEQ0
257460	326970	233420	1440900	2635800	2334800				12	12	12	28.8	28.8	28.8	57.451	0	205.21	13793000000	19	F1P933	F1P933
257280	217270	247090	298520	864960	696480				4	4	4	39	39	39	13.527	0	36.973	1633300000	6	F1PSI7;E2RTK0	F1PSI7;E2RTK0
257100	369190	413360	882780	745910	723950			+	8	8	8	14	14	14	67.011	0	59.539	3246400000	8	CON__P02672;Q28243;J9NRV7;F1PBL4	CON__P02672
256740	213260	254070	57639	45628	49945				7	7	7	13.9	13.9	13.9	92.278	0	158.48	2602100000	7	F1PQT5	F1PQT5
255870	364000	440700	950950	2572400	2018400				14	14	14	22.2	22.2	22.2	92.378	0	176.58	19854000000	21	E2RGR7	E2RGR7
255090	199180	249390	143530	550070	459800	+			1	1	1	1.6	1.6	1.6	95.518	1	-2	24993000000	2	E2RSU0;E2RSU2	E2RSU0;E2RSU2
253640	210020	247430	177850	368190	357420				3	3	2	10.7	10.7	9.2	46.737	0	29.749	1307200000	5	J9P966;E2RSS5	J9P966;E2RSS5
252040	155680	186220	69940	100530	88850				2	2	2	7.3	7.3	7.3	29.746	0	14.727	1115700000	2	E2QUQ7	E2QUQ7
248290	205950	234230	159820	214240	193240				10	1	1	49.7	6	6	32.546	0	69.689	9290000000	11	J9P0F9	J9P0F9
246300	205480	249040	449800	769560	608540				4	4	4	21.7	21.7	21.7	30.48	0	108.74	20217000000	8	E2R806	E2R806
245770	128690	142030	47062	52327	28893			+	3	3	3	8.7	8.7	8.7	24.241	0	28.051	3046300000	3	CON__P02777	CON__P02777
244310	177640	195860	86434	277280	220670				3	3	3	20.9	20.9	20.9	16.577	0	33.888	2468500000	3	E2RI34;F1Q0S5;F1PWI8	E2RI34;F1Q0S5;F1PWI8
243240	222370	240240	155260	455920	257800				5	5	5	29.8	29.8	29.8	29.669	0	71.804	2907600000	5	E2QXF0;J9NX36;E2QXC4;W0S257	E2QXF0
242400	219200	244430	191350	209970	192230				3	3	3	5.8	5.8	5.8	72.715	0	26.799	1271400000	3	J9NWI0;F1PB89	J9NWI0;F1PB89
242070	198850	211590	190540	460120	319350				2	2	2	6.8	6.8	6.8	50.597	0	47.66	979640000	2	F1PZ83	F1PZ83
240260	220070	238240	357890	743190	723990				9	9	9	9.6	9.6	9.6	137.24	0	121.33	2648800000	10	F1PU93	F1PU93
239820	265290	297820	266170	516400	521060				4	4	4	10.8	10.8	10.8	41.161	0	37.707	2151500000	5	F1PQS3	F1PQS3
239760	223080	252180	29134	37230	34095				3	3	3	5	5	5	54.509	0	17.387	946360000	3	F1P9B6;J9P7D9;I6LJ37;J9PAI7;I6LJ36;J9P7K6	F1P9B6;J9P7D9;I6LJ37;J9PAI7;I6LJ36;J9P7K6
239540	270040	367720	354760	712190	509720				7	7	7	24.1	24.1	24.1	39.594	0	57.441	3905400000	7	E2RFV7	E2RFV7
239220	254220	274340	319490	395840	392370				6	6	6	10.4	10.4	10.4	57.416	0	40.977	1485900000	6	F1PL97	F1PL97
239160	244310	256750	307080	734510	706320				8	8	8	24.4	24.4	24.4	42.848	0	74.78	3064200000	12	J9NTR8;F6V5U1	J9NTR8;F6V5U1
238510	204360	230680	98403	136470	136940				3	3	3	7.1	7.1	7.1	45.559	0	21.416	692580000	3	E2QUB4;E2QUB1;E2QU92;F6V3I5;E2QX25;J9P9W3	E2QUB4;E2QUB1;E2QU92;F6V3I5;E2QX25;J9P9W3
237870	276110	322350	268720	450560	454330				13	8	8	26	18.7	18.7	67.908	0	128.54	2889300000	13	E2R7F1	E2R7F1
236070	201090	226530	183590	423830	408450				4	4	4	5.8	5.8	5.8	120.5	0	74.672	1239700000	4	J9NUP0;F1PKR9;J9P948	J9NUP0;F1PKR9;J9P948
235740	230680	245830	300830	557760	536040				3	3	3	9.1	9.1	9.1	42.502	0	30.535	1897400000	4	E2QWG8	E2QWG8
234770	201150	230460	174090	273870	240400				2	2	2	6.7	6.7	6.7	24.95	0	12.122	774450000	2	F1Q0S2;F1Q0V9	F1Q0S2;F1Q0V9
234170	258340	305760	170020	310460	303510				2	2	2	6.6	6.6	6.6	33.15	0	25.857	1299700000	3	J9P735;A1Z2X6;F1P6D7	J9P735;A1Z2X6;F1P6D7
232220	226600	245080	313500	559470	550270				6	6	6	28.2	28.2	28.2	29.97	0	49.51	2259000000	9	E7BUQ0;E7BUP9;E2RPC6	E7BUQ0;E7BUP9;E2RPC6
230320	287250	317140	579010	720320	600420				6	6	4	18	18	11.8	48.263	0	237.63	5493000000	8	E2R8D6;E2RJH5	E2R8D6;E2RJH5
227700	220530	261620	288970	486550	455800				9	9	9	5.6	5.6	5.6	230.68	0	92.475	1590400000	10	F1PZD5;J9P3K0;J9NXQ1	F1PZD5;J9P3K0;J9NXQ1
226560	191760	205620	466180	610850	513400				8	8	7	24.5	24.5	22.9	47.749	0	92.224	3668300000	8	E2QXS7	E2QXS7
225100	237650	254340	414880	445060	425960			+	5	5	5	19	19	19	35.979	0	78.05	4793700000	6	CON__Q03247	CON__Q03247
224970	249290	244320	74104	139080	128410				4	4	4	11.7	11.7	11.7	53.938	0	40.985	1492300000	7	F1PPA0	F1PPA0
222220	218900	227130	348400	638390	663090				5	5	5	20.9	20.9	20.9	22.781	0	48.558	8857400000	6	E2QW34	E2QW34
220480	406630	417080	147400	187390	187280		+		1	1	1	0	0	0	46.082	0.0017182	6.5197	3948700000	2	REV__E2RCP3	REV__E2RCP3
219270	204840	242630	147200	249860	241360				11	5	5	20.9	12.6	12.6	71.068	0	110.91	1207100000	7	E2RRC6	E2RRC6
218780	151290	157940	257220	785090	779660				8	8	8	31.8	31.8	31.8	39.505	0	246.77	4088600000	14	E2R1A0;J9NTJ7;J9P9A0;J9NV99;Q9N1Q3;J9NTE1;F1PB10;Q9N1Q2;F1PZ69;E2RMN5	E2R1A0;J9NTJ7;J9P9A0
218000	214340	227130	384150	616400	577720				5	5	5	34.1	34.1	34.1	22.979	0	49.587	4317900000	8	E2QX17;J9NTB8	E2QX17;J9NTB8
217880	197120	242200	156210	206900	199440				9	9	9	13.1	13.1	13.1	118.2	0	140.63	2102200000	10	J9NUL0;F1Q147	J9NUL0;F1Q147
217480	162960	179080	199180	357110	343410				1	1	1	4.8	4.8	4.8	19.517	0.00087642	6.7281	1265300000	1	E2QWU0	E2QWU0
214990	170760	207790	170950	289660	283840				5	4	4	16.4	14.9	14.9	44.868	0	66.821	1268100000	4	E2RM09;J9P1N5;F1PJW4;J9P8D8;J9P4E4;E2R7K1	E2RM09;J9P1N5;F1PJW4
213350	196050	209270	100980	140250	138860				3	3	3	13.3	13.3	13.3	30.114	0	28.446	1215400000	4	F1PDS3;F1PXM5;J9NSZ5	F1PDS3;F1PXM5
212320	219610	261120	149810	226400	229790				3	3	3	7.1	7.1	7.1	54.312	0	75.58	3392500000	4	F1PLT7	F1PLT7
211800	203480	199990	570300	223670	220900				7	3	3	4	2.1	2.1	165.95	0	36.92	5344600000	5	J9PBN6;F6UMP8	J9PBN6;F6UMP8
211290	219920	245680	131670	322720	281880				4	4	4	28.5	28.5	28.5	19.793	0	53.656	2773700000	4	L7N0I1;E2QY85;J9NV76;F1P634;J9P960	L7N0I1;E2QY85;J9NV76;F1P634;J9P960
211090	195370	210640	145570	286670	423690				2	2	2	4.9	4.9	4.9	43.847	0	10.634	466600000	2	F1Q433;F1Q436	F1Q433;F1Q436
209970	220160	193130	158800	174310	123860	+			1	1	1	3.7	3.7	3.7	34.077	1	-2	1269800000	2	E2RSX2	E2RSX2
209580	178980	205100	88472	129740	120680				5	5	5	5.9	5.9	5.9	154.51	0	37.345	1323600000	6	F1PVZ9;F1PW00	F1PVZ9;F1PW00
208860	185750	234030	101980	124650	113760				2	2	2	24.3	24.3	24.3	12.667	0	34.029	346180000	2	F1Q136	F1Q136
208010	240120	247430	251160	584050	514620				5	5	5	5.2	5.2	5.2	129.34	0	79.669	4889300000	7	E2R925;J9P0R7;Q6IG20	E2R925;J9P0R7;Q6IG20
207420	258200	304560	176980	385140	398780				5	4	4	49.1	40.6	40.6	12.416	0	43.556	1724300000	4	B8ZXI2	B8ZXI2
206990	181000	196420	218300	396250	397490				5	5	5	12.3	12.3	12.3	45.396	0	33.493	2742000000	5	E2QXY7	E2QXY7
206740	210750	222170	271760	531770	526010				10	10	10	11.2	11.2	11.2	107.18	0	81.653	3249800000	10	E2R9A2	E2R9A2
206730	198390	202520	258390	375820	388600				6	6	6	21.3	21.3	21.3	36.997	0	57.006	3332200000	7	J9P6R1	J9P6R1
204160	186480	206760	240230	560090	498170				5	5	5	23.9	23.9	23.9	32.066	0	46.842	1810900000	6	J9NRI0;F1PGY4	J9NRI0;F1PGY4
203550	311900	349740	869440	441080	430260			+	6	6	6	19.6	19.6	19.6	52.295	0	109.53	2209100000	8	CON__Q3SZV7	CON__Q3SZV7
202010	201550	241060	796670	473000	383460			+	7	7	7	16.9	16.9	16.9	54.71	0	98.715	3653700000	9	CON__P28800	CON__P28800
201310	207570	244500	234090	510270	474710				8	8	8	13.4	13.4	13.4	92.006	0	80.202	2522300000	8	F1P969	F1P969
201230	175120	212460	23617	18816	20311				2	2	2	8.3	8.3	8.3	32.694	0	19.393	591440000	2	F1PP71	F1PP71
200290	237030	270010	199240	355250	365150				3	3	3	5.8	5.8	5.8	49.875	0	20.739	2012500000	4	E2QZD4;J9NVM8	E2QZD4;J9NVM8
198980	198140	217080	225290	184920	156030				7	7	7	4	4	4	268.61	0	57.468	1743100000	9	F1PWR1;B1H0W0	F1PWR1;B1H0W0
198980	125780	127380	116690	648450	370630				3	3	3	28	28	28	14.515	0	24.884	2252600000	3	E2R4N7	E2R4N7
198200	187010	214970	129930	479120	425210				1	1	1	0.7	0.7	0.7	129.21	0.0025316	6.3846	4754900000	2	E2RB34	E2RB34
197580	200690	239730	152080	237720	190680			+	3	3	3	13.6	13.6	13.6	22.336	0	18.842	2520800000	4	CON__ENSEMBL:ENSBTAP00000034412	CON__ENSEMBL:ENSBTAP00000034412
196400	189070	217580	87337	135640	133890				2	2	2	5.3	5.3	5.3	58.472	0	24.841	1264900000	2	F1PTG9;J9P955	F1PTG9;J9P955
195350	241040	263880	300000	1066200	948170				8	8	8	9.4	9.4	9.4	100.58	0	70.886	5608600000	10	Q32KH2;F1Q233	Q32KH2;F1Q233
194120	244140	285550	137650	184430	145620				3	3	3	5	5	5	83.18	0	35.212	3265000000	4	E2QYZ4	E2QYZ4
193970	209160	236970	117580	187640	189500				10	10	10	9.7	9.7	9.7	158.94	0	90.897	2661800000	10	J9P743;Z4YHE9;Q8I007	J9P743;Z4YHE9
192290	145540	171940	60250	92540	95839				3	3	3	20.1	20.1	20.1	24.605	0	31.025	1134900000	4	E2RLV2	E2RLV2
190840	236690	240340	681820	461860	466830			+	6	6	2	11.1	11.1	4.8	68.709	0	46.444	9398400000	7	CON__P01045-1	CON__P01045-1
190740	281450	323620	365160	338530	276830				68	2	2	33.4	0.8	0.8	387.03	0	44.564	3633000000	5	J9NSQ6	J9NSQ6
190560	157280	190720	220540	183660	199470				4	4	4	19.6	19.6	19.6	24.983	0	61.141	1455500000	4	E2RDX2;E2R7B4	E2RDX2
189470	154760	164420	187300	327040	315730				2	2	2	21.9	21.9	21.9	12.093	0	41.282	1559300000	2	E2RD65	E2RD65
189090	161160	166080	230900	443490	403460				9	9	1	15.7	15.7	2.9	77.488	0	110.74	3663300000	12	J9P4R4	J9P4R4
188320	180190	201100	133750	213010	227440				7	7	7	16.6	16.6	16.6	53.095	0	84.232	2303300000	7	F1PE09	F1PE09
188160	127080	152610	180670	225950	201320				5	4	3	7.9	6.7	5.1	107.44	0	93.524	887540000	8	F1PAF1	F1PAF1
188020	166210	168510	179380	388160	349240				7	7	7	22.5	22.5	22.5	49.184	0	181.04	2334400000	8	F1PQ40;J9NWB0	F1PQ40
186880	159270	166470	135140	127440	120650				3	3	3	11.4	11.4	11.4	41.959	0	27.918	285010000	4	F1PWA9	F1PWA9
186800	184380	205670	161340	363920	344900				1	1	1	5.1	5.1	5.1	24.484	0	14.532	852180000	2	F1PR82	F1PR82
186290	118040	141280	56868	190100	157440				4	4	4	28.1	28.1	28.1	21.863	0	64.648	4300300000	5	E2R149;J9NVY8	E2R149
185690	211760	232870	111250	180340	180470				7	7	7	12.2	12.2	12.2	88.279	0	50.828	2624300000	8	E2QX57;F1P7Z9;F1PBG1;F1PBG2	E2QX57;F1P7Z9
185670	119440	144870	122250	445930	374500				2	2	2	27	27	27	13.361	0	22.647	3890500000	4	F1Q1T5	F1Q1T5
185270	286480	319600	251970	72812	125550	+			1	1	1	1.4	1.4	1.4	98.7	1	-2	6263100000	1	Q9MYV0	Q9MYV0
185220	169770	185270	183650	246120	250120				6	6	6	16	16	16	59.678	0	99.577	1752700000	8	E2R0I9;J9P9E9	E2R0I9;J9P9E9
180420	234170	91392	333100	813940	960150				2	2	2	3.6	3.6	3.6	51.738	0	10.672	531590000	2	F6UXU9;E2QU16	F6UXU9;E2QU16
179740	147610	163500	295240	549790	505890				4	4	4	12.8	12.8	12.8	42.289	0	74.758	2600000000	6	E2RHX6;REV__J9P574	E2RHX6
179490	84127	94878	51606	159810	96549				1	1	1	11.4	11.4	11.4	8.7083	0.0056225	5.9142	247150000	1	J9NUU3	J9NUU3
178600	142920	144250	204440	435760	379130				9	9	9	21.3	21.3	21.3	66.696	0	122.84	3610500000	12	F1PHR6;J9P3X7;J9P0W2	F1PHR6;J9P3X7;J9P0W2
177360	228650	408760	6873500	4116400	2811400				30	30	30	32.2	32.2	32.2	129.44	0	323.31	62226000000	52	F1PHY1	F1PHY1
176130	204190	205120	76302	96011	97972				2	2	2	6.6	6.6	6.6	40.952	0	13.478	989620000	2	F1PDQ0	F1PDQ0
175070	128600	147460	142800	386140	284460				18	1	1	60.9	4.6	4.6	41.227	0	69.592	1262500000	8	J9NXE2	J9NXE2
174690	164920	197780	153340	209430	213150				9	9	9	20.6	20.6	20.6	66.364	0	80.37	3884100000	11	F1PR93	F1PR93
172570	155590	184110	129320	390890	364400				3	3	3	53.9	53.9	53.9	11.706	0	40.615	10928000000	10	E2R9Y9;J9P0A3;J9P6M3	E2R9Y9
172030	122720	136290	67035	165360	149560				3	3	3	20.7	20.7	20.7	17.258	0	16.848	2094400000	3	E2QUE7	E2QUE7
171970	166130	183110	239820	389990	375900				6	6	6	14.6	14.6	14.6	72.657	0	81.413	1422800000	8	E2R9J8	E2R9J8
170200	162740	184640	405960	767640	704370				13	13	12	13.9	13.9	13.4	136.96	0	139.01	3783700000	13	J9NWI6;F6UMF1;F1PRA2;REV__J9NTJ3;REV__J9NYR1;REV__F6XTS6	J9NWI6;F6UMF1
169490	206670	231270	194840	347070	397690				2	2	2	8.3	8.3	8.3	33.715	0	31.412	778240000	4	J9P7Y8;J9P048;J9NYX1;J9P9N7;J9P0B1;F1PH52;J9NYB4	J9P7Y8;J9P048;J9NYX1;J9P9N7;J9P0B1;F1PH52;J9NYB4
168330	164960	176230	112790	183780	193400				7	7	7	10.5	10.5	10.5	105	0	125.08	1987700000	8	F6XNH4;F1PYV1	F6XNH4;F1PYV1
167800	180990	184410	109420	142310	143930				4	4	4	7.2	7.2	7.2	86.209	0	57.858	2006900000	6	E2QRR1	E2QRR1
167250	154100	190990	69136	271590	232230				2	2	2	18.8	18.8	18.8	14.798	0	20.81	1723800000	3	J9NYB5	J9NYB5
166920	157900	183760	138540	318410	289360				9	6	3	34.3	26.7	15.5	49.867	0	89.239	4817900000	10	E2QYC2;CON__ENSEMBL:ENSBTAP00000025008;J9P716;J9NUU1	E2QYC2
166790	143960	157980	110000	214050	216350				2	2	2	5.6	5.6	5.6	48.994	0	31.751	321720000	3	E2RJU3	E2RJU3
166350	200410	239690	524580	712870	659060				7	7	7	27.9	27.9	27.9	41.191	0	141.43	4920900000	9	E2R1I9;F1P6Q9	E2R1I9
166180	206360	226490	501360	428540	371000			+	6	6	6	17.4	17.4	17.4	56.44	0	53.108	3639100000	8	CON__P02676;F1PGS2;F1PW65	CON__P02676
164330	148880	173720	117990	180290	168060				2	2	2	3.7	3.7	3.7	68.243	0	23.47	707010000	3	E2QU34	E2QU34
163970	142220	158390	92954	156900	153320				4	4	4	28.5	28.5	28.5	21.183	0	31.404	3919000000	4	J9P652;J9NYJ8;J9NZU8;J9P4B9	J9P652;J9NYJ8;J9NZU8;J9P4B9
163480	132150	155460	149480	410710	350310				7	7	7	29.8	29.8	29.8	38.4	0	89.085	1565700000	7	E2RCZ6;E2RCZ7	E2RCZ6;E2RCZ7
162040	207100	242930	50159	69357	63185				1	1	1	3.9	3.9	3.9	30.934	0	6.8661	222320000	1	J9P6J1;F1Q3G6	J9P6J1;F1Q3G6
160770	237630	278570	663940	385130	354120			+	8	8	8	26.8	26.8	26.8	53.553	0	196.87	6698800000	12	CON__Q2KJF1	CON__Q2KJF1
160630	242730	268390	572660	828300	900530				5	5	5	11.9	11.9	11.9	50.149	0	47.038	4161800000	7	F1P9E5	F1P9E5
160440	145590	173130	79588	111160	103930				4	4	4	2.2	2.2	2.2	236.46	0	31.647	335290000	4	F1PNV3;E2RK18	F1PNV3
158730	147020	223090	126570	204460	216520				1	1	1	8.8	8.8	8.8	14.263	0	11.578	1643900000	3	E2RN10	E2RN10
155610	178020	189470	221190	404090	418130				4	4	4	8.2	8.2	8.2	64.422	0	42.021	935880000	6	E2RF46	E2RF46
155260	146070	166610	185650	550400	461130				5	5	5	9.7	9.7	9.7	70.793	0	70.692	1402500000	5	F1P7J0;E2RIS4;F1Q1U4	F1P7J0
151890	133180	149270	124820	220350	212980				6	6	6	26.7	26.7	26.7	37.512	0	40.671	1674300000	6	L7N0D0;E2QXE0;J9P5A8;F1P7S9	L7N0D0;E2QXE0;J9P5A8;F1P7S9
151230	172610	202080	797950	852490	953510				5	5	5	18.7	18.7	18.7	33.749	0	84.86	4644400000	9	J9NS23;F1PY69	J9NS23;F1PY69
151060	144540	162680	85260	111980	101870				2	2	2	2.1	2.1	2.1	120.82	0	17.845	285680000	2	F1PUX3;J9P9R7;F1P8C2	F1PUX3;J9P9R7;F1P8C2
150600	159280	145570	360180	321400	330330			+	6	6	6	11.5	11.5	11.5	85.686	0	72.895	1752600000	7	CON__Q3SX14;F6Y3P9	CON__Q3SX14
150260	131460	146180	43702	55783	52353				1	1	1	2.2	2.2	2.2	35.78	0.0040617	5.9988	251910000	1	G3FJD3	G3FJD3
149520	161410	179390	112070	185560	185700				2	2	2	9.5	9.5	9.5	21.871	0	15.334	1080300000	2	E2R4I1	E2R4I1
148760	143270	167850	120210	241040	262690				5	5	5	32.7	32.7	32.7	22.377	0	74.783	4088400000	9	F1P6P2	F1P6P2
146850	118720	125070	163330	485250	398030				3	3	3	13	13	13	23.656	0	36.318	2174800000	3	E2R1C4;E2RPQ0	E2R1C4;E2RPQ0
146780	92139	106030	67649	146270	112630				4	4	4	29.6	29.6	29.6	18.693	0	30.931	1851800000	4	F1PWM2;J9P4T5;J9NXT7;J9NVK8;J9NSP4;J9NZU6;J9NYS9;F1PL86	F1PWM2;J9P4T5;J9NXT7;J9NVK8;J9NSP4
145790	128020	126510	72314	138560	118760				4	2	2	22.5	11	11	21.285	0	11.403	1266400000	2	J9NYK5	J9NYK5
145400	156790	167390	154430	278910	286140				18	8	8	22.8	10.9	10.9	104.93	0	72.862	1913600000	8	L7N071;E2R5T9;J9NSY0;E2QWM4	L7N071;E2R5T9
145160	184970	204950	202800	942460	911420				8	8	8	25.8	25.8	25.8	44.771	0	105.28	2750700000	11	E2RMN6	E2RMN6
145070	127720	139440	170340	373300	339080				3	3	3	11.1	11.1	11.1	34.817	0	27.942	976370000	3	F1PU02	F1PU02
144200	124940	145180	151140	365060	311650				12	12	12	16.4	16.4	16.4	109.45	0	111.83	2051000000	13	F1PUB9	F1PUB9
143680	127030	142520	76590	106620	103550				2	2	2	8.9	8.9	8.9	24.518	0	14.456	998230000	2	E2RC10	E2RC10
143560	232160	265090	39490	34204	43274				5	5	5	14.8	14.8	14.8	32.726	0	44.203	2783500000	5	E2RT70	E2RT70
142350	142330	162330	201310	840860	744500				7	7	6	14.6	14.6	12.5	62.656	0	91.623	4483600000	9	F6XIK8	F6XIK8
141530	136500	163940	73643	79536	83582				3	3	3	16.9	16.9	16.9	33.36	0	85.385	860820000	3	F1PWT3	F1PWT3
140900	170560	139750	549300	455650	446620				8	2	2	5.9	1.6	1.6	165.22	0	12.968	31750000000	5	F6UME0;REV__J9JHC0	F6UME0
140450	144310	145400	128740	367790	360540				3	3	3	4.8	4.8	4.8	59.578	0	18.765	688700000	3	J9P5T5;F1PCJ7;F1PXP9	J9P5T5;F1PCJ7;F1PXP9
140200	132010	163890	217450	270280	261790			+	2	2	2	8.5	8.5	8.5	49.083	0	27.032	882130000	2	E2RN74;CON__Q2KIG3	E2RN74;CON__Q2KIG3
139360	118990	129760	34120	45942	51125				6	6	6	9.6	9.6	9.6	96.958	0	51.042	689480000	6	E2QXY5;E2QY03	E2QXY5;E2QY03
139110	188710	212120	227240	429150	463290				10	10	10	31.9	31.9	31.9	53.141	0	125.92	8230700000	15	E2RSV9;J9P4L1	E2RSV9
138370	78634	89071	97107	188210	150490				2	2	2	11.2	11.2	11.2	17.856	0	18.967	1572600000	3	F1PKR6	F1PKR6
137430	117110	127740	132050	258150	220930				7	7	5	11.5	11.5	8.4	95.1	0	57.79	1388400000	8	F1PDT7	F1PDT7
137220	160780	187130	549800	1694300	1238500				12	12	12	32.7	32.7	32.7	43.975	0	128.56	2916300000	19	F6Y2H4	F6Y2H4
136500	121030	142330	170520	335540	301500				8	8	8	19.3	19.3	19.3	60.966	0	104.98	4847500000	10	E2QUY7	E2QUY7
136410	95969	103590	116170	238530	191140				4	2	2	5	2.2	2.2	105.49	0	22.906	571980000	2	J9NWS6;F1PE67	J9NWS6;F1PE67
136070	117120	130660	116860	298870	285300				2	2	2	2.7	2.7	2.7	85.134	0	48.543	168410000	2	F1P8K1;J9PAS2	F1P8K1;J9PAS2
135760	128030	142260	138430	254310	233780				11	11	11	9.1	9.1	9.1	169.86	0	101.25	1669500000	13	E2QUR2	E2QUR2
135440	129100	159910	48345	88042	83358				3	3	3	56.9	56.9	56.9	8.0242	0	65.665	1954000000	3	J9P702	J9P702
135090	137900	173590	675610	1512900	570420				16	16	16	7.2	7.2	7.2	311.85	0	129.43	7422600000	18	F1PIA3;E2RS46	F1PIA3
134030	96108	114060	62740	83404	69963				3	3	3	17.9	17.9	17.9	28.945	0	60.44	1499600000	5	E2RJN6	E2RJN6
133800	118360	142820	60198	98838	91010				1	1	1	5.1	5.1	5.1	25.079	0	11.699	1088300000	3	E2RTL5;E2R608;F1Q0B2	E2RTL5;E2R608;F1Q0B2
133620	108620	131380	63575	86684	82050				4	3	1	5.8	4.7	2	106.17	0	19.826	565240000	4	F1PAD5;F1P9P1	F1PAD5;F1P9P1
133490	204020	222090	104570	480580	579300		+		1	1	1	0	0	0	85.897	0.0095465	5.7901	2276200000	2	REV__J9PAN1	REV__J9PAN1
130720	84605	102850	71386	213000	173740				3	3	3	19.4	19.4	19.4	15.436	0	20.708	6328700000	5	E2QVG7;F2Z4N3;E2R202	E2QVG7;F2Z4N3
130300	224860	262450	50988	67359	79471				2	2	2	9.6	9.6	9.6	19.701	0	15.672	921100000	5	J9P9A6	J9P9A6
129970	108070	124260	33884	68571	60206				2	2	2	12.8	12.8	12.8	23.704	0	64.866	952630000	3	E2RPI8;E2RPI9	E2RPI8;E2RPI9
128960	148240	162620	110880	203570	208020				8	8	8	22.3	22.3	22.3	64.726	0	119.32	2618600000	11	F1P797	F1P797
128810	259750	244260	52129	41113	39622				5	5	5	26.6	26.6	26.6	21.69	0	37.96	4444100000	6	J7I8M6;F5CBP3	J7I8M6;F5CBP3
128760	93151	114060	80574	306260	272970				3	3	1	22.3	22.3	4.6	14.839	0	17.153	8586000000	3	J9P798;J9NSL1;J9P7C2;E2R443	J9P798;J9NSL1
128230	138430	160460	185450	305910	305630				9	9	9	13.3	13.3	13.3	104.1	0	85.705	2594900000	10	E2RJ14	E2RJ14
126750	134610	163080	25094	23660	22981				4	4	4	11.8	11.8	11.8	48.209	0	72.323	1385000000	5	F1PLR3;F2Y8C8	F1PLR3
126650	130180	151880	70211	105770	124950				2	2	2	4.7	4.7	4.7	56.246	0	15.147	358660000	2	E2RAU3;F1Q3B4	E2RAU3;F1Q3B4
125850	124210	138700	216530	357320	355350				8	8	8	8.5	8.5	8.5	133.9	0	92.011	1173400000	9	F1P624	F1P624
125590	110500	117380	7828	6027	7235				2	1	1	73.1	26.9	26.9	3.1037	0.0033085	6.225	2740200000	1	A9RA72	A9RA72
125120	111390	123830	180960	381790	344510				7	7	7	7.1	7.1	7.1	135.56	0	81.264	1975000000	9	E2RR33	E2RR33
124550	152230	73076	31048	17939	30374				1	1	1	1.9	1.9	1.9	52.498	0.0017123	6.5092	5717900000	5	F1PC33	F1PC33
123560	102080	105940	110630	111310	112740				1	1	1	2.4	2.4	2.4	37.344	0.0025063	6.3108	235990000	1	F1PSR9	F1PSR9
123060	176330	217630	638630	1302300	842060			+	9	9	4	15	15	8.2	77.456	0	176.49	11434000000	15	CON__ENSEMBL:ENSBTAP00000016046	CON__ENSEMBL:ENSBTAP00000016046
122250	132490	151510	130910	240600	212930				4	4	4	41.8	41.8	41.8	17.15	0	80.05	1694500000	9	J9NX46	J9NX46
121740	83988	149150	64646	72691	58601				2	2	2	9.8	9.8	9.8	34.699	0	12.072	365900000	2	E2QSB5	E2QSB5
121640	181470	221900	300680	1184600	1093000				3	3	2	9.6	9.6	5.1	37.394	0	55.285	1987200000	4	F1Q1K6;E2QXH4	F1Q1K6;E2QXH4
121390	95159	98631	167280	256610	224780				6	6	6	9.8	9.8	9.8	102.39	0	59.53	1203800000	6	E2R667	E2R667
121160	207040	237060	688260	307090	316550			+	7	7	6	13.7	13.7	12.2	85.411	0	72.586	3000400000	9	CON__Q3KUS7;E2RS75	CON__Q3KUS7
120550	122030	114490	118010	200810	217750				5	5	5	16.3	16.3	16.3	42.615	0	45.335	2210900000	5	E2R0S6	E2R0S6
120010	103150	111460	77326	143000	132230				4	4	4	7.7	7.7	7.7	71.508	0	54.291	1446300000	4	E2RSP4	E2RSP4
119070	105620	118840	69677	127730	124450				5	5	5	5	5	5	141.52	0	53.101	1341800000	7	O46605;Q8HZQ9;Q6PSM2;Q4PLA8;C0KKU9;Q8WNU6;Q8HYR5;O77794;F1PH11	O46605;Q8HZQ9;Q6PSM2;Q4PLA8;C0KKU9
118910	103860	127760	61340	79315	74330				4	4	4	12.5	12.5	12.5	51.662	0	43.389	1378100000	4	F1PQT1	F1PQT1
118500	292680	368350	53336	78307	74428				1	1	1	3	3	3	31.405	0.001705	6.4893	2179200000	1	F1PHZ3	F1PHZ3
118150	126040	167840	37406	48928	41212				1	1	1	2.7	2.7	2.7	62.023	0	10.356	424220000	1	F1PG90	F1PG90
118110	125150	144710	58553	96593	108210				2	2	2	11.6	11.6	11.6	15.679	0	13.147	553180000	2	E2QS58	E2QS58
118110	113680	128670	26694	23901	22573				35	2	2	23.7	2.1	2.1	191.05	0	65.731	1767700000	3	Q867A1	Q867A1
117250	119900	134750	67722	106390	98124				4	4	1	33.1	33.1	11	21.055	0	94.483	2906700000	6	G3DTQ5;A0A1B4XK94;Q15EU3;A0A1C9T7B1;A0A140KFP7;A0A140KFT2;A0A140KFT0;A0A140KFS5;A0A140KFS4;O98099;O98097	G3DTQ5;A0A1B4XK94;Q15EU3;A0A1C9T7B1;A0A140KFP7;A0A140KFT2;A0A140KFT0;A0A140KFS5;A0A140KFS4;O98099;O98097
116890	113370	129800	170000	208380	162140				4	4	4	4.7	4.7	4.7	151.63	0	52.532	1529800000	5	F6Y3U7	F6Y3U7
116880	100310	112530	45258	77090	71915				3	3	3	8.5	8.5	8.5	39.871	0	20.019	1363800000	3	E2R8W7	E2R8W7
115950	96788	114220	69034	131970	127070				3	3	3	7.7	7.7	7.7	44.616	0	34.824	969780000	3	F1Q260	F1Q260
115300	103300	101050	123020	211310	198680				1	1	1	1.7	1.7	1.7	54.632	0.0025084	6.3182	108550000	2	E2RJ23;E2R5H6	E2RJ23;E2R5H6
114700	113610	115960	162310	781920	827980				9	9	9	23.4	23.4	23.4	37.041	0	63.202	3191800000	12	E2RLQ4;J9NU79;J9NYT3;E2QWT4	E2RLQ4;J9NU79;J9NYT3
113590	110020	128960	74775	133970	127530				13	13	13	12.3	12.3	12.3	189.16	0	126.04	3234700000	14	F1PJ65	F1PJ65
113490	115060	131620	115800	434240	434010				5	5	5	15.3	15.3	15.3	46.699	0	38.565	663800000	5	E2RH09	E2RH09
112270	167590	194550	132860	318380	361790				4	4	4	12.1	12.1	12.1	35.943	0	25.619	1586700000	5	E2RQ14	E2RQ14
111720	59033	69878	29938	24667	29477				5	5	5	8.5	8.5	8.5	79.373	0	37.466	989680000	5	F1PW82	F1PW82
111400	143540	122740	108040	164980	199890				3	3	3	14.2	14.2	14.2	27.478	0	52.12	300430000	3	E2RST6	E2RST6
110910	118120	138600	231370	427710	365290				3	3	3	9.7	9.7	9.7	40.258	0	25.222	1929300000	5	E2RQF8	E2RQF8
110190	86918	52886	36363	81987	97061				2	2	2	4.1	4.1	4.1	66.476	0	13.684	378310000	2	F1PE38	F1PE38
110140	129290	169590	742580	887000	705890				6	6	6	6.5	6.5	6.5	137.83	0	217.92	8103600000	13	F1PS66;J9P689;J9NX61	F1PS66;J9P689;J9NX61
109840	98404	117700	213530	502820	413110				2	2	2	4.7	4.7	4.7	46.006	0	13.489	852010000	2	J9NRH2;F1PLD5	J9NRH2;F1PLD5
109780	91128	91862	88892	114300	117510				3	3	3	4.8	4.8	4.8	125.38	0	22.437	235130000	4	J9NRT0;F1P9C4	J9NRT0;F1P9C4
109730	117630	130720	111250	81795	64300	+			1	1	1	3.3	3.3	3.3	39.965	1	-2	584730000	1	E2RCI1;F1PWH7	E2RCI1;F1PWH7
108030	75456	86701	32869	27294	30520	+			1	1	1	5.5	5.5	5.5	26.687	1	-2	333690000	1	J9P5K5;E2R8X4	J9P5K5;E2R8X4
106830	129750	140950	243360	392060	399640				9	9	9	19.7	19.7	19.7	55.619	0	71.238	2616500000	9	F1Q1Q8;E2R5R9	F1Q1Q8;E2R5R9
106660	101610	124270	172050	439490	392170				7	7	7	31	31	31	43.028	0	90.775	5194000000	12	E2R9T6	E2R9T6
106640	111190	123170	133520	270040	267310				5	5	5	18.3	18.3	18.3	42.461	0	63.821	1169100000	5	F6XFY9;F1PTS0	F6XFY9
106180	85294	88656	7839.2	4491.5	4683.2				1	1	1	4.8	4.8	4.8	19.996	0	7.517	500470000	2	Q004A7;J9P5R8;Q004A8;Q004A9;J9PB47;A1YV65;A1YV66;Q004B0;J9NYC5;A1YV64;Q004B1;Q004B2	Q004A7;J9P5R8;Q004A8;Q004A9;J9PB47;A1YV65;A1YV66;Q004B0;J9NYC5;A1YV64;Q004B1;Q004B2
105610	108740	125700	100200	174790	195050				4	4	4	10.7	10.7	10.7	44.146	0	28.251	765360000	4	E2RMC1	E2RMC1
105530	102200	106510	87198	229680	228790				4	4	4	9.9	9.9	9.9	44.953	0	23.639	583970000	4	J9P1N0	J9P1N0
104190	106490	103700	129550	226740	223960				6	6	6	6.9	6.9	6.9	119.52	0	49.988	930280000	7	F6X4J2	F6X4J2
103510	87837	92917	240560	526570	486670				8	8	8	39.5	39.5	39.5	44.417	0	180.47	3331000000	9	E2QZ05	E2QZ05
103370	69199	76084	54839	98686	71914				5	5	5	33.8	33.8	33.8	33.909	0	77.504	1431400000	6	F1PM32	F1PM32
102670	69802	80963	57458	107630	80145				2	2	2	25	25	25	14.895	0	78.16	478990000	3	J9P897;F2Z4P3	J9P897;F2Z4P3
102520	30339	45444	48399	59309	48200			+	8	2	2	13.8	4.3	4.3	60.024	0	13.701	282940000	2	CON__P48668;CON__P04259;CON__P02538;L7N095;CON__Q8VED5;F1Q3U2;Q95LG9;E2R489;CON__P19013;CON__H-INV:HIT000016045	CON__P48668;CON__P04259;CON__P02538;L7N095;CON__Q8VED5;F1Q3U2;Q95LG9
102420	154600	108990	49142	83905	80888				3	3	3	12.8	12.8	12.8	43.704	0	45.244	1276000000	5	F1PVS7	F1PVS7
102270	80504	96390	75823	113010	107000				2	2	2	25.4	25.4	25.4	15.682	0	24.252	362940000	2	F1PDI6;J9NS22	F1PDI6;J9NS22
101320	87408	98410	97979	228620	204600				4	4	4	14.3	14.3	14.3	48.738	0	39.629	2138900000	6	J9NWA6;F1PBK7	J9NWA6;F1PBK7
100760	116140	123690	580950	332860	216940			+	4	4	4	13.1	13.1	13.1	39.234	0	40.049	1814000000	4	CON__P00978	CON__P00978
100740	79826	64464	32374	66002	67073				1	1	1	3.4	3.4	3.4	39.36	0	7.2276	276430000	2	E2RK13	E2RK13
100330	132340	132230	101450	69237	82309				2	2	2	10.3	10.3	10.3	20.201	0	12.387	970000000	2	E2RJ30	E2RJ30
100170	90382	104470	85857	129500	127980				5	4	4	9.1	7.3	7.3	86.635	0	28.572	579150000	4	F1PSZ2;F1Q3Z6	F1PSZ2;F1Q3Z6
99920	63456	83559	66197	125310	97749				1	1	1	2.4	2.4	2.4	81.6	0	15.256	168020000	1	E2R427	E2R427
99741	137650	160950	62540	118130	94344				3	3	3	4.2	4.2	4.2	85.049	0	20.334	398110000	3	J9P0D8;F6XP73	J9P0D8;F6XP73
99592	87335	98620	83919	318620	279750				1	1	1	7.5	7.5	7.5	14.386	0	7.7599	2566100000	2	E2RC86	E2RC86
99581	159820	171870	389130	219640	227050			+	2	2	1	27.5	27.5	15	8.5787	0	26.474	15771000000	3	CON__ENSEMBL:ENSBTAP00000038329	CON__ENSEMBL:ENSBTAP00000038329
99352	115130	133330	181900	353830	362310				3	3	3	18	18	18	22.765	0	25.227	2379800000	5	F1PYE3;A0A097HUC9	F1PYE3;A0A097HUC9
98854	75976	84554	55547	65069	62476				4	4	4	16.1	16.1	16.1	46.245	0	42.831	690350000	4	E2QWP1	E2QWP1
98520	135270	154080	116280	280250	269600				4	4	4	4.1	4.1	4.1	136.85	0	37.646	419330000	4	J9P357;F1PNF3	J9P357;F1PNF3
98364	82768	91372	13939	14359	16764				1	1	1	4.7	4.7	4.7	16.624	0.0040551	5.9896	309410000	1	J9NTM4	J9NTM4
97850	104120	115040	254090	302060	323580				7	7	7	15.2	15.2	15.2	62.837	0	60.775	3382300000	7	E2R2C3;CON__Q3ZBD7	E2R2C3
97534	76510	70833	110360	202790	232810				2	2	2	4.2	4.2	4.2	59.243	0	13.842	784310000	3	E2RE57	E2RE57
96968	103070	113050	170370	419580	409390				5	5	5	8.6	8.6	8.6	88.781	0	42.784	1443600000	6	E2RDL8	E2RDL8
96933	90843	108040	41223	59314	56492				4	3	3	3.7	3.3	3.3	196.11	0	53.901	522010000	3	E2R4J1	E2R4J1
96423	75163	59954	28112	44199	42358				2	2	2	3.3	3.3	3.3	44.067	0	53.951	54898000	2	C4TGH8	C4TGH8
95363	120570	134400	74431	134690	169520				2	2	2	17.7	17.7	17.7	11.066	0	21.518	2034800000	3	J9P5V4;E2RGM0;J9NYC2	J9P5V4;E2RGM0;J9NYC2
94153	49895	62687	38236	41468	41717				1	1	1	5.8	5.8	5.8	16.587	0.0025	6.3082	464480000	1	F1PAR9	F1PAR9
93315	108320	135880	23374	18877	19232				3	3	3	7.5	7.5	7.5	65.585	0	29.196	402950000	3	J9NU59;F1PIL9;J9P9X0	J9NU59;F1PIL9;J9P9X0
93137	94002	108090	207840	556530	472760				4	4	4	6.5	6.5	6.5	74.225	0	35.938	2110700000	6	F1PBJ3;J9NSW5	F1PBJ3;J9NSW5
93007	91225	96604	127670	235250	218280				10	10	10	17	17	17	97.75	0	163.44	2024600000	11	E2RPG9	E2RPG9
91744	75684	92222	33687	66604	53166				1	1	1	6.3	6.3	6.3	34.693	0	21.285	398490000	1	J9P742;F1PIU9	J9P742;F1PIU9
91560	81135	71242	197220	169290	157860				2	2	2	7.8	7.8	7.8	32.974	0	11.961	761060000	3	A0A3B0ITJ5;F1PPL9	A0A3B0ITJ5;F1PPL9
91459	87733	98593	117080	180090	173350				3	3	3	11.4	11.4	11.4	56.341	0	29.921	550010000	3	E2R2A4	E2R2A4
91373	118730	137590	280470	221820	210260			+	5	5	5	18.1	18.1	18.1	55.207	0	58.078	1124200000	5	CON__ENSEMBL:ENSBTAP00000018574	CON__ENSEMBL:ENSBTAP00000018574
91277	92768	106200	53236	63751	62095				5	5	5	4.4	4.4	4.4	210.83	0	59.216	812770000	5	E2RE80;E2RE81	E2RE80;E2RE81
90954	233810	218670	102380	132320	117670				1	1	1	1.1	1.1	1.1	80.376	0.0080257	5.8992	1734200000	1	E2RQA6	E2RQA6
90316	95642	105990	109580	213510	189500				6	6	6	18.4	18.4	18.4	57.819	0	70.623	871450000	8	E2RR97;E2RR74;F1PB67;E2RG57;E2RG56	E2RR97;E2RR74
90176	104480	110050	171660	324910	323810				2	2	2	16.4	16.4	16.4	20.466	0	94.866	2326200000	2	F1PF02	F1PF02
89879	77604	90289	101430	325010	133370				3	3	3	2.9	2.9	2.9	127.54	0	25.111	346330000	4	F1P6Z2	F1P6Z2
89664	76385	92010	47838	76274	75604				1	1	1	1.1	1.1	1.1	102.07	0	7.0123	76402000	1	J9NZ27;E2RLG1	J9NZ27;E2RLG1
89200	77492	82195	53129	64931	62159				3	3	3	19.9	19.9	19.9	23.067	0	56.016	450610000	3	J9P6H6;E2RLP0	J9P6H6;E2RLP0
88684	83233	83277	102150	200520	199320				3	3	3	8.3	8.3	8.3	39.574	0	55.206	1388100000	3	E2QY43	E2QY43
87857	101580	111050	213110	216720	220830				3	3	3	11.8	11.8	11.8	45.364	0	98.817	2418100000	5	F1PRE1	F1PRE1
87461	83755	90184	70804	123320	115420				7	7	7	4.5	4.5	4.5	282.25	0	94.843	961110000	7	J9P2H0;F1PAP5;Q864L2	J9P2H0;F1PAP5
87293	90381	100580	74292	114350	117780				2	2	2	2.2	2.2	2.2	95.232	0	11.717	1124900000	2	B4YUE1;F1PAK1;B4YUE0;J9NUZ0;E2RNC3	B4YUE1;F1PAK1;B4YUE0;J9NUZ0;E2RNC3
86716	71906	67480	114800	178190	193970				2	2	1	2.5	2.5	1.5	99.912	0	12.762	195040000	2	F1PB77;Q9N0W1	F1PB77;Q9N0W1
86306	57833	56760	42979	56625	60871				1	1	1	1.7	1.7	1.7	63.675	0	7.5589	453090000	1	E2RHV3	E2RHV3
86184	70290	80063	80894	163720	154880				5	5	4	13.1	13.1	11.4	59.63	0	48.373	2062400000	6	E2R0K3;E2QZQ6;F1PX07;F1Q409;F1PNZ5;J9NXV1;E2R4K8;F1P6N1;F1PWZ8;E2RNP3;E2R9X8;F1P6M8;F1PHV5	E2R0K3;E2QZQ6
85589	89511	95227	139850	107180	111370				2	2	2	4.6	4.6	4.6	44.885	0	15.323	744620000	2	E2RNA7	E2RNA7
85220	83597	88189	89745	124970	127530				5	5	5	2.8	2.8	2.8	272.8	0	40.701	538190000	5	F1PXT8;F1PXU1;J9NT02;E2RSI4	F1PXT8;F1PXU1
84835	92960	100260	35141	31622	31808				2	2	2	7	7	7	33.239	0	20.46	369000000	2	J9P095	J9P095
84659	128620	53244	43982	31702	27553		+		1	1	1	0	0	0	66.922	0.0056497	5.948	341210000	5	REV__E2RT31	REV__E2RT31
84073	91499	96508	117810	241130	273180				2	2	2	9.6	9.6	9.6	28.425	0	25.602	547330000	2	J9NT23	J9NT23
83789	50981	55737	57018	133890	120390				2	2	2	22.3	22.3	22.3	13.848	0	39.383	4821700000	4	J9P4R8	J9P4R8
83434	74740	74501	104160	321040	302200				2	2	2	25	25	25	8.496	0	12.587	892580000	2	J9P061	J9P061
83261	77353	77738	137590	431300	380920				2	2	1	10.2	10.2	5.6	19.244	0	15.874	511830000	2	F1PFC6	F1PFC6
83048	104100	149670	1395100	2690300	1908200				9	9	8	28.7	28.7	25.8	46.501	0	187.61	7594100000	10	F2Z4Q7	F2Z4Q7
82964	68555	81701	51416	76994	70591				4	4	4	5.6	5.6	5.6	67.744	0	30.544	754750000	5	E2QUA6	E2QUA6
82963	82422	77706	26339	27169	32692				3	3	3	4.4	4.4	4.4	102.65	0	23.049	309700000	4	F1PGL0	F1PGL0
82908	80089	96552	155030	292510	270970				7	4	4	13.4	8.4	8.4	61.472	0	55.833	876060000	5	F1PNP7	F1PNP7
81970	90353	103870	74484	103950	106200				4	4	4	26.5	26.5	26.5	23.413	0	56.798	1231700000	6	E2R516	E2R516
81720	87594	103460	71722	216430	186150				5	5	5	34	34	34	17.602	0	64.033	5079200000	8	F2Z4N1;J9NVG6;Q9XSU9;J9P2Z6	F2Z4N1;J9NVG6;Q9XSU9
81685	75465	85018	85315	168080	149780				5	5	5	10.9	10.9	10.9	58.214	0	32.632	2308100000	5	E2RN00	E2RN00
81634	133520	173200	63631	101790	126340				1	1	1	1.2	1.2	1.2	75.459	0.0024938	6.2887	2004400000	2	F1PGJ2	F1PGJ2
81003	54196	77226	102970	135420	143670				2	2	2	1.9	1.9	1.9	96.177	0	10.8	405060000	2	F1P7E6	F1P7E6
80821	100560	126350	154690	236650	260670				2	2	2	7.2	7.2	7.2	50.144	0	30.314	620950000	3	E2RM11	E2RM11
80759	104530	116950	75235	143350	138160				1	1	1	10.2	10.2	10.2	12.29	0	9.1786	2034600000	2	A0A1Y1FJ26;J9P9U4;F1PVP5	A0A1Y1FJ26;J9P9U4;F1PVP5
80613	62776	68559	108350	180750	155850				13	13	13	4.5	4.5	4.5	573.44	0	150.84	1537900000	16	E2RF02	E2RF02
80395	63034	81176	29580	111910	104400				1	1	1	9.2	9.2	9.2	15.641	0	14.375	1739200000	3	E2R885;F6XF47;J9P9J8;J9NSZ2;J9P608;J9PBK4;J9PAG2;J9P1I4;J9P168;J9NZX1;E2QZG2	E2R885;F6XF47;J9P9J8;J9NSZ2;J9P608;J9PBK4;J9PAG2;J9P1I4;J9P168;J9NZX1;E2QZG2
80365	71818	86000	28953	30593	33829				1	1	1	7.9	7.9	7.9	12.51	0.00087566	6.7278	330930000	1	F1P778	F1P778
80226	78516	89535	52874	90998	82911				4	4	4	7.1	7.1	7.1	71.469	0	22.199	865470000	5	E2RRN8	E2RRN8
79537	97304	97409	130960	99160	94370		+		1	1	1	0	0	0	14.936	0.0033195	6.2519	2479600000	1	REV__Q3HTU5;REV__F6PN11	REV__Q3HTU5;REV__F6PN11
79220	66271	77635	44440	60806	58672				1	1	1	7.1	7.1	7.1	35.247	0	47.901	1640800000	3	J9NYK7	J9NYK7
79021	111540	119420	87920	157030	155570				2	2	2	4.3	4.3	4.3	57.179	0	13.126	390550000	2	E2RF42	E2RF42
78210	81264	113670	1016200	1528900	1368400				9	9	9	39.2	39.2	39.2	41.895	0	198.53	22448000000	19	G1K2D8	G1K2D8
78144	70260	74797	39547	45942	44194				1	1	1	2.3	2.3	2.3	41.489	0.00087873	6.7362	133730000	1	F1P666	F1P666
77869	96340	114360	252670	141310	141860			+	4	4	4	12.6	12.6	12.6	51.723	0	117.09	921880000	5	CON__P50448	CON__P50448
77805	85800	99111	91508	183660	206300				3	2	2	18.2	12.6	12.6	21.898	0	20.548	872000000	2	F1PCG4	F1PCG4
77769	80549	93730	107620	234130	234180				6	6	6	7.5	7.5	7.5	117.23	0	41.37	1597300000	6	E2RGH5;J9P920;S5U7Q4;S5U8H7;S5TR75;A0A0G2YCS2;S5THR3	E2RGH5;J9P920
77737	77629	94237	74972	130560	102910				3	3	3	10.9	10.9	10.9	37.71	0	22.095	232570000	3	J9NZU5;L7N0F0	J9NZU5;L7N0F0
77621	62957	70665	45726	68476	59909				5	5	5	32.1	32.1	32.1	23.707	0	55.445	4194400000	6	E2QW69	E2QW69
77505	123080	322550	266390	68908	87037				2	2	2	0.4	0.4	0.4	225.37	0	10.982	755390000	2	E2RSW0	E2RSW0
77479	63087	81467	454700	102990	109440				2	2	2	2.5	2.5	2.5	108.03	0	10.646	221160000	2	F1PB11;E2RMS9	F1PB11;E2RMS9
76473	71500	81767	63064	72751	74456				1	1	1	13.4	13.4	13.4	7.2763	0.0017138	6.5121	1043600000	2	E2RGI5	E2RGI5
75751	71205	74175	87280	127800	129480				7	7	7	22.1	22.1	22.1	51.885	0	108.26	1383500000	10	F1PVI2	F1PVI2
75504	59951	68009	492850	190710	179840				6	6	6	7.3	7.3	7.3	87.631	0	38.487	2515000000	7	F1PZL5	F1PZL5
75086	73679	71607	71268	87788	78889			+	2	2	2	11.1	11.1	11.1	22.975	0	14.601	249960000	2	CON__P02662	CON__P02662
74842	104360	124990	97450	35194	53451	+	+		1	1	1	0	0	0	47.015	1	-2	314860000	1	REV__J9NX38	REV__J9NX38
74456	73371	88924	50919	78761	77779				3	3	3	30.4	30.4	30.4	23.393	0	101.91	1378000000	4	F1PL93	F1PL93
74169	66419	74254	88277	215510	201170				4	4	4	7	7	7	91.034	0	48.115	912830000	6	E2R2U3	E2R2U3
73810	80760	95357	861020	381990	318420				5	5	5	26	26	26	37.077	0	65.302	2135900000	8	E2RN38	E2RN38
73456	100240	107310	53440	81047	95685				4	3	3	26.7	21.8	21.8	19.093	0	70.952	2558700000	5	F6Y478	F6Y478
73386	76447	94924	25485	39888	38405				2	2	2	2.7	2.7	2.7	110.53	0	18.349	373160000	2	F1P9W5	F1P9W5
73147	86949	105750	269830	176090	167790			+	5	5	5	7.8	7.8	7.8	101.24	0	73.035	1116400000	5	CON__Q0VCM5;F1Q418	CON__Q0VCM5
73088	87740	109890	69849	147400	147070				2	1	1	30.9	22.1	22.1	7.2944	0	33.203	1198200000	1	E2R9G5;J9PAK7;E2REQ8	E2R9G5;J9PAK7;E2REQ8
72950	95866	103270	292590	209140	193660				5	5	5	2.4	2.4	2.4	302.02	0	89.738	1269100000	5	Q1ERT3;J9NX00;F1PVW8;E2QY39	Q1ERT3;J9NX00;F1PVW8
72873	59870	67999	31124	46181	41957				1	1	1	12.5	12.5	12.5	11.943	0	29.206	129260000	1	F1PCT1	F1PCT1
72696	83454	99210	91215	246540	236190				7	7	7	26.3	26.3	26.3	35.938	0	67.981	2182300000	8	F1PXG4	F1PXG4
72682	85965	95527	211890	122500	122170			+	5	5	5	16.5	16.5	16.5	46.017	0	56.402	1143400000	8	CON__Q9TT36;F1PB85	CON__Q9TT36
72675	186260	200560	146180	625870	599020				2	2	2	2.6	2.6	2.6	31.069	0	12.608	3649300000	3	E2RBV8	E2RBV8
71866	79284	80803	110760	122930	132240				2	2	2	3.2	3.2	3.2	73.428	0	14.311	70566000	2	S5THQ6;J9P0V9;E2RRQ7;E2RMU5	S5THQ6;J9P0V9;E2RRQ7;E2RMU5
71450	68457	77461	77204	189230	177580				8	8	8	25.2	25.2	25.2	48.633	0	134.81	2266400000	8	F1PPH7	F1PPH7
71376	71891	77494	95343	190010	180730				3	3	3	9.3	9.3	9.3	40.637	0	44.553	966600000	4	F1PEK5	F1PEK5
71315	73600	74225	94753	98206	112980				2	2	2	6.9	6.9	6.9	37.105	0	13.87	202930000	2	J9NU71;F1PWR0	J9NU71;F1PWR0
70455	58244	69746	35282	59713	57073				1	1	1	3.3	3.3	3.3	49.475	0	8.5977	211340000	1	J9NY08	J9NY08
70053	70224	80532	85175	192000	169210				2	2	2	10.4	10.4	10.4	24.198	0	13.334	452100000	2	E2RI17;J9P758	E2RI17;J9P758
70003	48630	55653	12705	11231	11898				1	1	1	1.5	1.5	1.5	113.2	0	7.2419	208650000	1	E2RFE1	E2RFE1
70001	49659	48092	98328	222390	202240				2	2	2	4.9	4.9	4.9	43.729	0	12.202	895070000	2	E2R0S7;F6UQJ5;E2QTS3;F6UQI5	E2R0S7;F6UQJ5;E2QTS3;F6UQI5
69990	67031	82394	150630	116010	110760			+	24	4	4	18.8	4.8	4.8	192.99	0	51.911	882760000	5	CON__ENSEMBL:ENSBTAP00000007350;J9PAD1;F1PWR2	CON__ENSEMBL:ENSBTAP00000007350
69918	77788	88067	66975	121710	133340				3	3	3	5.6	5.6	5.6	57.074	0	17.323	454140000	3	E2RNQ8	E2RNQ8
69709	71598	82783	23808	22573	22159				3	3	3	4.5	4.5	4.5	122.36	0	71.752	714570000	5	F1PGX2;F1PGX1	F1PGX2;F1PGX1
69692	64162	75832	57523	124490	123310				1	1	1	1.8	1.8	1.8	52.567	0	8.0181	329530000	1	E2QXD1	E2QXD1
69641	102240	129380	507960	1261500	943420				9	9	9	23.7	23.7	23.7	64.092	0	145.95	7327600000	12	E2QW82	E2QW82
69271	68400	74539	93218	169930	154200				1	1	1	2	2	2	53.846	0.00086957	6.6369	108250000	1	E2RE31;J9NVC6	E2RE31;J9NVC6
69249	64762	70816	52424	60851	59514				2	2	2	4.4	4.4	4.4	91.693	0	16.186	149560000	2	E2QWQ7	E2QWQ7
69222	65172	70166	21982	86453	37280				1	1	1	7.5	7.5	7.5	22.418	0	9.4989	74202000	2	J9NW86;E2R6W9	J9NW86;E2R6W9
69169	68634	77395	32869	43518	41277				3	3	3	16.9	16.9	16.9	21.507	0	24.606	881410000	3	E2R5A5;F1P864	E2R5A5
68844	45123	52371	23533	67288	53365				1	1	1	7.9	7.9	7.9	20.252	0	38.54	782100000	1	E2R9G7	E2R9G7
68714	34153	35335	15103	29615	26661				2	2	2	11.4	11.4	11.4	13.078	0	11.627	1013400000	2	Q9XST9;E2RHF5;F6XA89;F1PZD9;J9PA77;F1P9Z0;J9NVV9;F1PZD0	Q9XST9;E2RHF5;F6XA89;F1PZD9;J9PA77;F1P9Z0;J9NVV9;F1PZD0
68650	78255	91276	85382	117560	127270				5	5	5	21.5	21.5	21.5	38.826	0	61.419	1385000000	5	E2R413	E2R413
68503	73352	82413	101970	138710	135430				4	4	4	5.3	5.3	5.3	123.04	0	113.26	574070000	4	E2RF06	E2RF06
68416	65559	83916	31371	63072	59000				2	2	2	0.9	0.9	0.9	265.34	0	10.962	188660000	3	F1PS94;A0A3G6V761;J9NS51;F1PPP5;F1PDC7	F1PS94;A0A3G6V761;J9NS51;F1PPP5;F1PDC7
67994	98785	106730	382490	118710	160500		+		1	1	1	0	0	0	23.154	0.0041186	6.1641	5631500000	2	REV__F1PIU7	REV__F1PIU7
67767	57039	60591	77530	61535	56772				2	2	2	3.9	3.9	3.9	83.699	0	13.596	73964000	2	F1P9C6;F1PVS6;J9P3Y6;F1PVU3;F1Q1P8	F1P9C6;F1PVS6;J9P3Y6;F1PVU3;F1Q1P8
67705	58061	66153	103200	142540	128170				3	3	3	7.2	7.2	7.2	71.556	0	27.497	365940000	4	F1PBX0	F1PBX0
67054	63807	69005	52337	75319	89957			+	2	2	2	8.1	8.1	8.1	28.87	0	11.186	947530000	2	E2RB38;F1P916;A0A0N9JS23;A0A0N9JIB9;E2RBW4;F1P912;F6X7L0;E2RAH4;CON__Q3SX28;A0A0N9JE84;E2R674	E2RB38;F1P916;A0A0N9JS23;A0A0N9JIB9;E2RBW4;F1P912;F6X7L0;E2RAH4;CON__Q3SX28;A0A0N9JE84;E2R674
66695	78287	91131	73794	419900	322250				2	2	2	5.4	5.4	5.4	42.46	0	12.022	332860000	2	E2R068	E2R068
66192	53793	53594	127820	295570	280160				4	4	4	15.8	15.8	15.8	27.616	0	24.637	1444800000	4	E2RF39	E2RF39
65921	68540	77915	167130	184120	187540				4	4	4	13.7	13.7	13.7	50.641	0	41.137	941590000	4	K0J6C5;K0J5K2;F1Q1M8	K0J6C5;K0J5K2;F1Q1M8
65545	56662	62203	49184	70662	70617				1	1	1	2.9	2.9	2.9	77.469	0	16.368	244850000	1	F1PQD3	F1PQD3
65215	77861	98389	219270	146640	129320			+	1	1	1	6.9	6.9	6.9	22.144	0	8.1742	410860000	2	CON__Q2KIS7	CON__Q2KIS7
64806	64733	72261	50272	115180	112130				1	1	1	0.6	0.6	0.6	201.53	0.0048465	5.9509	409970000	1	J9NVW6;E2R7W3	J9NVW6;E2R7W3
64762	66385	72886	70600	139430	142040				7	7	6	14.2	14.2	12.5	94.379	0	65.488	1359300000	8	E2RT63;E2RRM6	E2RT63
64087	182730	176560	223190	126430	273890		+		1	1	1	0	0	0	40.855	0.0080321	5.9008	3104400000	1	REV__E2RN78;REV__E2R758	REV__E2RN78;REV__E2R758
64034	65759	80249	49574	112560	102740				2	2	2	1.9	1.9	1.9	174.69	0	26.006	406130000	4	F1Q2M4;J9PAY8;F1PRA7	F1Q2M4;J9PAY8;F1PRA7
63610	63416	77526	35926	49788	53895				2	2	2	10.9	10.9	10.9	33.858	0	15.247	157790000	2	E2RF98	E2RF98
63524	50921	59406	76663	89170	85711				3	3	3	9.5	9.5	9.5	56.861	0	51.949	1818500000	5	F1P9A7;J9P3X8	F1P9A7;J9P3X8
63265	52584	59292	41842	106070	99040				2	2	2	1.7	1.7	1.7	73.817	0	17.816	227230000	2	J9P440;E2QRR5	J9P440;E2QRR5
63246	97876	105980	35071	54765	58517				1	1	1	4.3	4.3	4.3	30.064	0	9.0187	312200000	1	F1PGZ1	F1PGZ1
62360	82996	106130	272950	164480	132100			+	7	6	6	20.2	17.3	17.3	46.228	0	117.16	2114400000	6	CON__Q95121	CON__Q95121
62316	86065	85246	54243	79726	88552				2	2	2	3.3	3.3	3.3	51.23	0	11.036	328990000	2	F6V4W0;F1PUT4	F6V4W0;F1PUT4
61674	48554	53450	49128	117980	105700				2	2	2	13.3	13.3	13.3	23.675	0	17.921	1582800000	2	J9P4C5	J9P4C5
61603	76875	87555	222680	356500	315120				2	1	1	2.1	0.9	0.9	91.169	0.0048544	5.9605	29512000000	3	F1Q421	F1Q421
61578	86203	92136	51686	67913	70269				2	2	2	25	25	25	13.735	0	32.205	367160000	3	E2R7R0	E2R7R0
61175	101960	109040	280920	140320	151990				1	1	1	2.4	2.4	2.4	43.773	0.00085985	6.5344	970820000	1	F1PCZ0	F1PCZ0
60509	63978	69435	87914	210530	214330				3	3	3	25.4	25.4	25.4	20.198	0	32.705	893420000	3	J9PAP6;F6Y3Y5	J9PAP6;F6Y3Y5
60390	53321	52640	60024	106120	106510				3	3	3	2.8	2.8	2.8	181.37	0	27.2	138600000	4	E2R6L1	E2R6L1
60068	79271	100860	288830	384220	299790				4	4	4	16.1	16.1	16.1	37.355	0	33.589	968780000	4	J9P7U9;F1PZF4;O62711	J9P7U9;F1PZF4;O62711
59757	55069	61839	86391	135550	134440				5	5	5	12.6	12.6	12.6	51.055	0	37.048	1383100000	5	F1PAP9;E2RTC3	F1PAP9;E2RTC3
59431	48818	57713	33838	52828	51807				1	1	1	2.6	2.6	2.6	47.339	0.00088028	6.7465	252100000	1	E2QSE3	E2QSE3
59148	38159	47187	11339	16943	13957				1	1	1	11.6	11.6	11.6	26.645	0	10.274	322420000	2	J9NXU1;E2RT76	J9NXU1;E2RT76
59090	57869	62901	92259	146980	137580				3	3	3	5.6	5.6	5.6	123.14	0	31.07	433480000	3	E2R9K4	E2R9K4
59047	50880	64583	486080	68724	67681	+			1	1	1	1.4	1.4	1.4	81.384	1	-2	962290000	1	J9P6C2;F1PJJ7;J9P8X3	J9P6C2;F1PJJ7;J9P8X3
58988	52351	64653	21508	28068	29428				1	1	1	4.4	4.4	4.4	42.069	0	8.7814	151320000	1	E2QWD3	E2QWD3
58600	50935	60624	41193	63893	61725				2	2	2	15.1	15.1	15.1	19.595	0	16	384830000	3	E2RMA1	E2RMA1
58161	51124	52267	51200	82585	76257				2	2	2	4.8	4.8	4.8	49.598	0	11.501	236270000	2	F1PK29	F1PK29
57755	49760	58602	75421	115850	100060				1	1	1	11.6	11.6	11.6	16.047	0	44.413	1638500000	3	J9PA14	J9PA14
57751	48976	57275	33025	53072	53045				15	4	4	28.9	11.8	11.8	69.883	0	30.636	541700000	5	E2QX84	E2QX84
56966	37590	46231	31209	84376	64311				1	1	1	4.2	4.2	4.2	24.507	0.0080128	5.8816	1084200000	1	J9PBD3	J9PBD3
56542	68399	76712	251480	297350	268780				13	13	13	3.6	3.6	3.6	502.76	0	111.51	3457700000	15	E2R4Q1;J9P315	E2R4Q1;J9P315
56315	44098	46131	35927	85818	75847				1	1	1	6.9	6.9	6.9	16.442	0.00087951	6.7366	467220000	1	S5U7Q9;J9NYQ8	S5U7Q9;J9NYQ8
56122	34889	41616	72233	152470	149660				2	2	2	20.8	20.8	20.8	14.585	0	13.939	602310000	3	E2RRA3	E2RRA3
55315	51358	61920	45388	89013	72494				2	2	2	3.2	3.2	3.2	134.82	0	41.079	934220000	3	A0A4D6CAB5	A0A4D6CAB5
54473	49227	54885	88282	165900	158780				2	2	2	13.3	13.3	13.3	27.665	0	64.916	3112600000	5	E2R1C3	E2R1C3
53845	67397	82317	124220	271770	215950				5	5	2	10.8	10.8	4.1	62.47	0	111.13	2650900000	7	J9NVY4	J9NVY4
53779	81510	102270	19246	26361	25860				1	1	1	2.5	2.5	2.5	55.812	0	17.5	182800000	1	F1PH98	F1PH98
53124	54521	63171	87871	221010	245730				2	2	2	25.2	25.2	25.2	12.187	0	37.561	637600000	2	J9NZA0	J9NZA0
52956	38236	43823	69142	125980	111940				4	4	4	11.4	11.4	11.4	53.011	0	43.638	1190100000	4	F6UXI8	F6UXI8
52701	57128	64288	51877	81494	81413				7	7	7	20.7	20.7	20.7	47.344	0	54.434	1230900000	7	F1PYI3	F1PYI3
52393	52912	63963	10016	13481	13038				3	3	3	19	19	19	11.552	0	35.776	997240000	3	J9NTG5	J9NTG5
51894	49617	51933	62342	118020	107480				7	7	7	19.1	19.1	19.1	47.366	0	65.988	1267800000	7	E2RH48	E2RH48
51859	38031	36794	186400	68017	45158	+			1	1	1	2.8	2.8	2.8	68.131	1	-2	163920000	1	F1P8J6;F6XWM4	F1P8J6;F6XWM4
51852	70283	69245	86276	129200	147130				5	5	5	11.3	11.3	11.3	57.983	0	40.679	2311500000	7	E2RLF1	E2RLF1
51824	55683	62402	42932	64010	57059				2	2	2	9.3	9.3	9.3	50.47	0	33.411	694520000	3	E2QYG5	E2QYG5
51744	43163	52677	307440	82359	82922	+	+		1	1	1	0	0	0	77.726	1	-2	357250000	1	REV__F1PQ17;REV__J9P5C3	REV__F1PQ17;REV__J9P5C3
51462	59339	72671	154130	89306	99711				3	3	3	1.7	1.7	1.7	265.49	0	22.537	1208300000	3	E2RL01	E2RL01
51457	50143	60265	40803	73523	62355				1	1	1	2.2	2.2	2.2	51.389	0.00088417	6.7794	199910000	1	E2R5H4	E2R5H4
51415	45556	51162	37948	54859	52100				1	1	1	6.1	6.1	6.1	20.427	0.00086881	6.6323	94737000	1	E2RG67	E2RG67
51274	59972	64560	56421	86706	97087				1	1	1	3.3	3.3	3.3	30.283	0.0008658	6.6182	556870000	1	F1Q1R1;E2QV08	F1Q1R1;E2QV08
50913	67056	75240	60789	94645	93847				3	3	3	8.1	8.1	8.1	64.222	0	29.46	374140000	4	E2QV97	E2QV97
50479	64497	68513	183830	483170	693390				3	3	3	8.7	8.7	8.7	49.853	0	45.898	944330000	3	E2RAI4;J9NTH0	E2RAI4;J9NTH0
49981	48401	53636	63754	75929	75076				1	1	1	12.6	12.6	12.6	14.432	0	11.61	129720000	1	J9P558	J9P558
49812	46794	54226	47881	83151	83901				4	4	4	30.1	30.1	30.1	27.44	0	45.254	615810000	4	F1PQ10	F1PQ10
49496	53165	61438	161710	348950	344350				7	7	4	19.6	19.6	12.1	61.875	0	71.675	2366900000	8	F1Q3Y2	F1Q3Y2
49368	52619	57043	71031	150800	136320				1	1	1	2.2	2.2	2.2	43.42	0.00087184	6.6624	121720000	1	E2QTP2;F1PPT5;F1PM93;F1PQD4	E2QTP2;F1PPT5;F1PM93;F1PQD4
49328	73693	95204	107670	426460	423060				4	4	4	5.7	5.7	5.7	109.19	0	29.1	1131600000	4	F1PHT0;E2RT58;F1PAR4;J9P8T6	F1PHT0
49216	62686	62219	50978	120110	112350				4	4	4	5.9	5.9	5.9	109.75	0	34.978	594260000	4	E2QTN0;J9P5I9;E2QYY9;E2RDZ9	E2QTN0;J9P5I9;E2QYY9;E2RDZ9
48709	61660	75707	28276	44523	42335				12	1	1	9.2	1	1	151.53	0	8.081	183520000	1	F1PMM7	F1PMM7
48693	63007	66343	88432	189040	191940				4	4	4	8.6	8.6	8.6	57.245	0	39.625	1676700000	6	F1PRT4	F1PRT4
48419	101230	104120	40552	48812	53449				2	2	2	5	5	5	57.058	0	11.934	905940000	2	E2R774	E2R774
47745	174770	175080	71046	79657	87312		+		1	1	1	0	0	0	35.135	0.0025424	6.4598	5873300000	2	REV__L7N0K6	REV__L7N0K6
47640	53742	59488	36029	57959	59446				3	3	3	5.7	5.7	5.7	85.264	0	39.134	524730000	4	F6XST9	F6XST9
47627	63091	71759	139580	362460	310160				1	1	1	0.4	0.4	0.4	173.09	0.0040584	5.9911	766700000	2	E2RHX5	E2RHX5
47479	53076	66726	456360	401160	346720				4	4	4	17.4	17.4	17.4	37.756	0	51.057	4151200000	8	E2QZN8	E2QZN8
47368	64386	74931	186250	122990	118740			+	3	3	3	12	12	12	45.456	0	78.183	1447500000	4	CON__Q3SZH5	CON__Q3SZH5
47197	46552	52893	53096	82122	81141				2	2	2	1.4	1.4	1.4	239.65	0	11.755	83079000	2	F1PMC5	F1PMC5
47180	31913	43330	41158	48998	44980			+	6	3	3	14	10.2	10.2	51.621	0	33.573	440720000	3	CON__P02533;F1Q0R0;CON__P08779;E2R7W6;CON__Q9Z2K1;CON__Q3ZAW8	CON__P02533;F1Q0R0;CON__P08779;E2R7W6
47005	43117	49971	34414	51984	46107				11	1	1	30.6	3.3	3.3	49.924	0	32.898	331000000	1	E2RBC3	E2RBC3
46971	64216	63911	64141	95458	108800				3	3	3	3.9	3.9	3.9	105.35	0	21.132	350000000	3	J9P755;F1P7C2	J9P755;F1P7C2
46958	46604	54155	113210	357240	258100				5	5	5	49.6	49.6	49.6	14.733	0	64.861	3069100000	7	E2RJL1;J9P859;J9P5U3	E2RJL1;J9P859;J9P5U3
46774	39801	45716	30841	59278	43981				4	2	2	16	7.8	7.8	27.229	0	31.272	483660000	2	E2REA4	E2REA4
46638	31810	33834	24234	73064	57917				1	1	1	8.1	8.1	8.1	14.562	0	18.619	748690000	1	E2RPE5	E2RPE5
46033	39617	40627	77719	117510	109810				2	2	2	4.8	4.8	4.8	37.564	0	11.324	169220000	2	E2QWE0	E2QWE0
45714	37526	41418	26438	33882	31201				2	2	2	4.1	4.1	4.1	57.05	0	13.702	65341000	2	F1PDP5	F1PDP5
45510	37711	45800	27967	52848	48679				2	2	2	2.4	2.4	2.4	110.4	0	24.637	137960000	4	E2RRR8	E2RRR8
45457	69091	67926	67728	76493	96274				1	1	1	2.5	2.5	2.5	53.278	0	23.061	176710000	1	J9NT37	J9NT37
45326	54281	64760	40737	83656	97134				1	1	1	7.8	7.8	7.8	10.039	0.0025147	6.3348	2722600000	1	E2R5P5	E2R5P5
45225	46626	53959	27531	26810	30859				3	3	3	3.9	3.9	3.9	132.95	0	27.105	658160000	3	E2QX93	E2QX93
45165	74767	56350	74461	87079	77547				1	1	1	2.7	2.7	2.7	53.188	0	10.917	153800000	2	F1Q1F6;F1Q1Q0	F1Q1F6;F1Q1Q0
44956	37536	45729	25374	32689	31345				1	1	1	10.9	10.9	10.9	15.824	0	18.66	823680000	2	E2R2A1	E2R2A1
44948	68276	74379	255840	127300	115440			+	2	2	2	3.6	3.6	3.6	69.561	0	12.866	19712000000	3	CON__REFSEQ:XP_585019;E2QZ19;E2R4E7	CON__REFSEQ:XP_585019;E2QZ19;E2R4E7
44441	52112	58278	51018	100770	93169				2	2	2	2.9	2.9	2.9	105.9	0	19.668	276280000	2	J9NUS5;J9P7I4;F1PTG8	J9NUS5;J9P7I4;F1PTG8
44429	50393	50280	49372	119880	109080				1	1	1	1.8	1.8	1.8	58.604	0	7.7128	128510000	1	F1PIR1	F1PIR1
43985	44399	48251	31589	54907	55780				1	1	1	6.8	6.8	6.8	22.079	0	9.2886	130550000	1	E2QVU9	E2QVU9
43758	45488	50434	56026	115410	124560				2	2	2	5.9	5.9	5.9	47.655	0	13.337	206670000	2	E2QXR8;E2RM49;E2RM67	E2QXR8;E2RM49;E2RM67
43219	39190	35995	31992	49029	48940				2	2	2	4.1	4.1	4.1	93.795	0	21.844	178120000	2	J9JHH0;E2RRN2	J9JHH0;E2RRN2
43073	44209	47557	51559	87853	76384				1	1	1	6.2	6.2	6.2	26.173	0	24.244	370530000	1	E2R1R4	E2R1R4
42988	42224	47956	34217	48151	44603				3	2	2	20.6	11.4	11.4	20.627	0	12.432	892140000	2	F1P9Z4	F1P9Z4
42188	39744	47608	43040	34558	34624				2	2	2	6.9	6.9	6.9	35.932	0	16.261	571150000	2	E2R071	E2R071
41110	48124	58734	32948	56750	61322				3	2	2	23.5	19.3	19.3	18.736	0	17.177	402350000	2	J9P2G7	J9P2G7
40917	38262	45744	55138	76066	69280				3	2	2	2.9	2	2	149.67	0	14.918	300740000	4	F1PYW3	F1PYW3
40836	42584	46505	15622	17065	20380				1	1	1	2.7	2.7	2.7	46.951	0	7.2425	69481000	1	E2RDJ9;F1PFX9	E2RDJ9;F1PFX9
40468	22163	26424	38611	92652	68228				1	1	1	15.5	15.5	15.5	9.461	0	9.2528	520700000	1	J9PAS9;J9NTI9;E2RLE2	J9PAS9;J9NTI9;E2RLE2
40036	50229	56538	104960	165180	161870				2	2	2	3.5	3.5	3.5	72.715	0	12.671	772510000	3	F1PGS1	F1PGS1
39750	31840	34286	32030	35422	34833				6	2	2	7.5	2.1	2.1	129.49	0	17.393	56609000	2	J9P8P9;E2R7S1	J9P8P9;E2R7S1
39726	30619	32759	36516	49140	43258				3	3	3	4	4	4	141.26	0	31.92	591930000	3	E2RNT3	E2RNT3
39320	17793	20094	41823	67386	45665				2	2	2	25.5	25.5	25.5	14.655	0	23.421	1088500000	4	A0A516UWM3;J9NYV7;E2RVU0;E2RVU1;E2RVU3	A0A516UWM3;J9NYV7;E2RVU0;E2RVU1;E2RVU3
39312	35157	44941	26637	32730	27138				4	4	4	6.7	6.7	6.7	119.5	0	40.773	508160000	5	J9NVU0;E2RL88	J9NVU0;E2RL88
38870	45721	51907	86513	263140	270170				3	3	3	20.5	20.5	20.5	19.79	0	21.582	1101800000	3	J9NZ89;F6V5G7	J9NZ89;F6V5G7
38360	26015	28090	22969	44656	41340				2	2	2	7.6	7.6	7.6	32.149	0	13.211	322260000	3	F6UKT8	F6UKT8
38061	43976	49720	30377	51772	49878				2	2	2	7.7	7.7	7.7	21.577	0	12.023	779710000	2	F1P8U3	F1P8U3
37887	46015	47599	50979	73196	67248				3	3	3	6.4	6.4	6.4	73.204	0	38.243	1102000000	5	E2R949	E2R949
37636	80377	89767	28507	50883	70245				1	1	1	5.3	5.3	5.3	29.702	0	37.628	1289100000	1	F1P9Q3	F1P9Q3
37490	41058	49668	30770	49374	50055				1	1	1	1.5	1.5	1.5	89.62	0	12.301	174230000	1	E2R5J7	E2R5J7
37416	37703	42612	63900	96229	94575				2	2	2	5.3	5.3	5.3	58.558	0	16.559	289570000	2	E2R4D5	E2R4D5
37117	18255	20527	49298	87538	59682				7	1	1	17.6	3.2	3.2	69.464	0	45.957	80792000	1	E2R9I0;E2R9I1	E2R9I0;E2R9I1
37020	24629	30479	70171	246680	183850				3	3	3	5.6	5.6	5.6	61.295	0	22.347	1137400000	3	E2RDF9	E2RDF9
36887	52954	54775	108850	99755	87612			+	4	4	4	30.8	30.8	30.8	26.59	0	71.124	2418600000	5	CON__Q05B55	CON__Q05B55
36312	192080	192010	10776	4927.1	5414.7				1	1	1	1.3	1.3	1.3	70.786	0.0025105	6.3214	1107600000	1	F1PP70;E2RCN8	F1PP70;E2RCN8
36015	35409	43448	298530	719280	353240				4	4	4	31.3	31.3	31.3	18.587	0	29.305	9261100000	5	E2R755	E2R755
35627	40231	49039	69093	94544	98577				3	3	3	5.8	5.8	5.8	99.746	0	24.916	795780000	3	F1PEC4	F1PEC4
35329	44173	43732	27469	44211	45785				3	2	2	6.8	5	5	76.17	0	18.634	62604000	2	A0A077KFB1;F1P8N6	A0A077KFB1;F1P8N6
35285	40490	50502	68983	240860	126360				3	3	3	13.1	13.1	13.1	28.899	0	25.649	5962900000	5	E2RNL2	E2RNL2
35171	43068	46465	43502	72461	60920				2	2	2	3.4	3.4	3.4	86.184	0	10.659	165940000	2	J9P1Q5;F6V2R0;E2RH29	J9P1Q5;F6V2R0;E2RH29
35138	21548	27541	52474	185400	139690				7	1	1	22.9	4.1	4.1	23.015	0.0008726	6.6712	2250000000	1	E2RRD2	E2RRD2
34960	41303	45496	22928	28408	32893				2	2	2	6.5	6.5	6.5	51.536	0	38.72	718660000	2	F1PWQ1	F1PWQ1
34665	18740	21304	8922.5	29504	23375				2	2	2	13.4	13.4	13.4	23.247	0	39.592	468200000	2	A0A0A0MPD2;Q9XSU2	A0A0A0MPD2;Q9XSU2
34591	27629	34978	11553	19913	17139				1	1	1	2.7	2.7	2.7	74.424	0	14.864	143690000	1	F1PEH9;J9P9G0	F1PEH9;J9P9G0
34425	35076	37943	48023	38044	35573			+	1	1	1	7.9	7.9	7.9	20.646	0.0017079	6.4912	355170000	1	CON__Q2KIT0	CON__Q2KIT0
34273	35762	29384	20292	38584	43525				4	2	2	23.2	8.8	8.8	20.772	0	12.474	134790000	2	W8E199;A0A140KFP9;O98069;O98053;W8E801;W8E7Z7;G3DTQ4;O98081;A0A1B4XK80;G3DTQ9;A0A0M5JF31;A0A140KFQ8;A0A140KFT1;Q9MXY0;W8E3N0	W8E199;A0A140KFP9;O98069;O98053;W8E801;W8E7Z7;G3DTQ4;O98081;A0A1B4XK80;G3DTQ9;A0A0M5JF31;A0A140KFQ8;A0A140KFT1
34174	32049	34109	61076	124010	97481				2	2	2	4.9	4.9	4.9	44.842	0	15.933	290720000	2	F1Q067	F1Q067
33786	78340	82603	102640	145590	176590				1	1	1	1	1	1	76.02	0.0032949	6.1714	204370000	1	E2RA21	E2RA21
33785	32716	35729	20352	40993	43312				1	1	1	7.2	7.2	7.2	17.142	0	9.2969	25964000	1	J9P4S8;J9P3Q3;F1PYX5;J9PA16	J9P4S8;J9P3Q3;F1PYX5;J9PA16
33479	37108	34863	29407	68804	75196				1	1	1	2.1	2.1	2.1	43.005	0	7.0302	491030000	1	J9P7X9	J9P7X9
33122	42299	48381	14492	11192	10965				1	1	1	12.9	12.9	12.9	13.51	0	9.9023	389920000	1	F1PY18;F1PY17	F1PY18;F1PY17
33100	29672	32829	27555	46236	44954				1	1	1	3.3	3.3	3.3	44.628	0	7.4438	62793000	1	J9NT20	J9NT20
32927	27139	30723	29920	60952	55878				1	1	1	2.8	2.8	2.8	57.472	0	9.8257	82856000	1	E2QU31	E2QU31
32607	31408	35283	27328	44292	49832				2	2	2	14.9	14.9	14.9	16.633	0	13.349	132930000	2	F1PLU5	F1PLU5
32599	29264	31390	26938	56296	51588				2	2	2	8.6	8.6	8.6	36.108	0	35.81	410990000	2	E2RL17	E2RL17
31865	27096	32504	37876	85319	87678				2	2	2	2.7	2.7	2.7	78.92	0	12.648	303290000	2	E2RMR3	E2RMR3
31646	44856	51077	19826	32057	19660				3	3	3	7.3	7.3	7.3	50.573	0	36.434	1124100000	3	F1PJM1	F1PJM1
31617	25212	27482	40788	70133	62103				3	3	3	3.3	3.3	3.3	134.87	0	28.348	389210000	3	E2R7R8	E2R7R8
30895	32335	36016	15290	21032	19339				1	1	1	5.9	5.9	5.9	35.863	0	7.701	112160000	1	E2RM30	E2RM30
30687	40131	43915	107830	78335	60586			+	1	1	1	13.3	13.3	13.3	11.756	0	33.481	519760000	1	CON__ENSEMBL:ENSBTAP00000014147	CON__ENSEMBL:ENSBTAP00000014147
30380	29118	37775	96343	318130	271740				7	2	2	35.3	18.1	18.1	21.808	0	80.557	1329300000	4	E2RR73	E2RR73
30357	23052	26345	22576	29706	27957				1	1	1	2.2	2.2	2.2	77.338	0	7.0826	89352000	1	E2RPL0	E2RPL0
30207	37484	40403	60700	80329	91630				3	3	3	12.6	12.6	12.6	44.126	0	33.767	614080000	5	F1PI70;F1PMQ2;Q9TV08	F1PI70;F1PMQ2
30108	27712	31472	41643	115060	87641				1	1	1	5.5	5.5	5.5	25.331	0.008	5.8723	828580000	2	J9P870	J9P870
30028	33417	33854	139840	224910	212870				2	2	2	2.9	2.9	2.9	65.014	0	12.955	291200000	2	F1PN20	F1PN20
29763	27580	30841	35167	61078	59746				3	3	3	12.8	12.8	12.8	58.123	0	29.072	699570000	3	F1PB95	F1PB95
29277	40577	44100	15576	16702	18567				2	2	2	4.5	4.5	4.5	86.976	0	19.846	192020000	2	F1PMC8;J9NZU4;A0A059WHJ1;A0A0N7ELA9	F1PMC8;J9NZU4;A0A059WHJ1;A0A0N7ELA9
29243	22254	22889	27753	67605	56337				2	2	2	12.8	12.8	12.8	25.073	0	15.454	934750000	2	E2R4Y6	E2R4Y6
29123	51350	59595	62981	33764	45682	+			1	1	1	2.6	2.6	2.6	45.763	1	-2	424770000	1	E2RK19	E2RK19
28760	26660	32563	9951.5	24724	23236				3	3	3	2.9	2.9	2.9	128.47	0	20.509	333980000	3	J9P013;J9P749;F1PEE3	J9P013;J9P749;F1PEE3
28528	25454	29114	21705	23001	24987				1	1	1	3.1	3.1	3.1	43.682	0	7.9996	78505000	1	E2QX20	E2QX20
28425	20014	21611	22842	44081	37799				1	1	1	2.7	2.7	2.7	54.91	0	12.334	46941000	1	E2R7S5	E2R7S5
28406	23964	30519	20933	32801	28396				4	4	4	30.7	30.7	30.7	31.525	0	84.527	665430000	5	E2R9R1	E2R9R1
27929	24880	33777	12429	13514	10070				2	2	2	7.2	7.2	7.2	48.039	0	45.677	259440000	2	E2RFH1	E2RFH1
27743	32581	36976	26514	44064	40735				2	2	2	4.9	4.9	4.9	58.002	0	13.504	412800000	2	E2RAI8	E2RAI8
27706	23115	26892	29880	53179	49830				4	1	1	11.2	3.7	3.7	37.467	0	22.961	579060000	1	J9P7Y9	J9P7Y9
27599	34450	36911	25212	47369	50335				1	1	1	5.8	5.8	5.8	25.01	0	9.0192	117440000	1	J9NT16	J9NT16
27397	22985	23999	26354	32526	30266				1	1	1	3.3	3.3	3.3	61.431	0.0033003	6.2005	380350000	2	F6XWJ1	F6XWJ1
27251	28156	33499	53723	116020	100030				5	5	5	11.2	11.2	11.2	101.99	0	86.334	985870000	5	E2RH91	E2RH91
27044	36298	40479	32876	56238	49505				2	2	2	10	10	10	41.389	0	14.241	371840000	2	E2R2N2	E2R2N2
26944	27210	28087	22044	28717	33739				4	3	3	16.7	11.8	11.8	25.362	0	18.799	808480000	3	J9NWR1	J9NWR1
26633	15394	11290	27260	75809	48419				1	1	1	2.4	2.4	2.4	56.37	0	8.1536	43139000	1	J9NYM0;F1PIC8	J9NYM0;F1PIC8
26598	22957	25732	27240	37488	35627				3	1	1	21.3	6.6	6.6	20.818	0	7.356	76055000	1	J9P6K0	J9P6K0
26424	30275	38350	32490	38859	40181				5	2	2	8.3	3.1	3.1	72.282	0	13.152	110440000	2	F1PIC7	F1PIC7
26111	27754	34398	35980	95186	86692				3	3	3	3.3	3.3	3.3	155.11	0	31.705	170880000	3	E2RID8;J9P6V4	E2RID8;J9P6V4
26110	32197	41076	38346	61398	61717				3	3	3	8.2	8.2	8.2	43.467	0	37.632	1290700000	4	J9P923	J9P923
26007	20920	18269	42910	147230	139770				5	5	5	16.4	16.4	16.4	48.64	0	68.886	236060000	5	E2QXZ1;J9P6E2	E2QXZ1;J9P6E2
25932	17441	19954	11235	15367	14741				1	1	1	3.5	3.5	3.5	73.016	0	11.4	72548000	1	F1PUU5	F1PUU5
25833	25088	29141	28863	42179	43006				2	2	2	4.2	4.2	4.2	78.301	0	14.927	87661000	2	E2R2V4	E2R2V4
25786	27999	26223	38109	43999	46480				2	2	2	4.3	4.3	4.3	88.94	0	21.189	209440000	2	F1Q332	F1Q332
25709	28071	29603	35754	72277	69343				1	1	1	3.5	3.5	3.5	36.69	0	7.9126	122020000	1	F6UVH0	F6UVH0
25662	34238	42137	23845	43131	59754				1	1	1	35	35	35	6.0909	0	37.981	911500000	2	Q4GX48	Q4GX48
25588	13118	16005	10429	12489	9322.3				1	1	1	8.5	8.5	8.5	29.266	0	14.439	53924000	1	E2QUZ0	E2QUZ0
25499	31031	42744	61266	50309	53813			+	1	1	1	4.5	4.5	4.5	43.017	0	26.524	90190000	1	CON__Q32PJ2	CON__Q32PJ2
25494	32314	41092	65618	121350	106230				4	1	1	24.4	8.3	8.3	27.468	0	28.715	2459400000	4	F1PQU6	F1PQU6
25360	30081	36465	23203	28973	30017				3	3	3	16	16	16	23.531	0	18.295	935200000	3	F1PGI1	F1PGI1
25334	30928	38515	33179	88074	76007				2	2	2	10.9	10.9	10.9	27.379	0	12.37	1173100000	3	J9P2I8;Q9XSU6;F2Z4N6	J9P2I8;Q9XSU6;F2Z4N6
25209	27307	30503	27873	49426	48968				1	1	1	2.7	2.7	2.7	46.621	0	9.393	315180000	1	J9P388;E2QY31	J9P388;E2QY31
24977	21321	25278	4335.2	2412.1	2805.1				2	2	1	45.9	45.9	26.2	6.8809	0	25.577	1440800000	2	Q6LAA1	Q6LAA1
24910	24945	30704	21176	26800	25897				2	2	2	5	5	5	54.372	0	24.808	609230000	2	E2RR96	E2RR96
24710	24387	25161	40615	55490	59512				3	3	3	7.3	7.3	7.3	55.409	0	30.27	676180000	3	E2RGK2;J9JHC8	E2RGK2;J9JHC8
24663	25386	26027	11682	28324	27020				1	1	1	1.4	1.4	1.4	83.653	0	9.0964	10795000	1	F1Q0U7;J9JHG4	F1Q0U7;J9JHG4
24499	30693	35295	86869	103930	103970				1	1	1	2.1	2.1	2.1	64.353	0.0024896	6.2719	145640000	1	E2QZA8	E2QZA8
24457	25640	30253	17232	36741	33719				1	1	1	4	4	4	46.216	0	10.615	77135000	1	E2RSK6	E2RSK6
24310	15880	17833	17064	18596	15642				1	1	1	10.7	10.7	10.7	19.823	0	7.8171	221900000	1	J9P9D2;F1Q0F2	J9P9D2;F1Q0F2
24162	38023	45214	76580	63020	62747			+	1	1	1	1.6	1.6	1.6	68.932	0.004065	6.0007	90221000	1	CON__Q32PI4	CON__Q32PI4
24102	26119	27901	21189	27209	28921				1	1	1	4.7	4.7	4.7	30.699	0	37.37	288470000	1	L7N0B9;J9P7P2	L7N0B9;J9P7P2
24021	30202	35128	25384	48593	45981				1	1	1	6.6	6.6	6.6	22.475	0	36.678	74723000	1	F6XQ49	F6XQ49
23992	22319	26852	22150	26800	25966				3	3	3	15.9	15.9	15.9	33.19	0	23.341	388830000	3	E2RQE7	E2RQE7
23975	30864	38096	38014	113140	105220				2	2	2	18.1	18.1	18.1	20.688	0	33.516	509200000	3	F1PU14	F1PU14
23923	35708	42515	23731	48652	51491				3	3	3	10.7	10.7	10.7	51.518	0	34.988	342040000	3	E2QWF5	E2QWF5
23838	33012	37048	57680	68046	44101				1	1	1	2	2	2	108.58	0	16.057	271220000	1	F1PFM6	F1PFM6
23812	23809	25401	1518.4	480.81	486.42				1	1	1	4	4	4	38.778	0	48.01	17460000	1	E2RAW5	E2RAW5
23757	28117	31178	201700	350690	370020				3	3	3	6.3	6.3	6.3	58.31	0	54.717	673150000	4	F1P7H1;F1PYK5	F1P7H1;F1PYK5
23668	20712	19086	22345	41502	39379				2	2	2	1.3	1.3	1.3	307.73	0	48.312	119610000	2	F1PFD6	F1PFD6
23537	23684	30868	60975	79323	77388				2	2	2	3.7	3.7	3.7	101.75	0	19.933	198010000	2	F1PLE9	F1PLE9
23391	21602	22273	19210	42607	38078				1	1	1	8.1	8.1	8.1	20.457	0	7.2921	83472000	1	H9GWA6;J9P9I6;J9P120;L7N0I9	H9GWA6;J9P9I6;J9P120;L7N0I9
23319	22530	26901	17273	25624	22683				2	2	2	8.4	8.4	8.4	45.143	0	16.774	439390000	2	E2RHZ1	E2RHZ1
23308	26404	31682	17393	24097	23831				1	1	1	10	10	10	22.418	0.00087796	6.7352	264230000	1	F1P699	F1P699
23203	30172	30522	16491	21280	22753				2	2	2	0.7	0.7	0.7	338.26	0	15.811	98143000	2	F1PA94;E2RLS2	F1PA94;E2RLS2
23057	17605	21117	26130	70802	61550				1	1	1	12	12	12	10.79	0	9.0705	1200100000	2	J9P098;J9NSG1	J9P098;J9NSG1
22943	23013	26450	21957	34667	33293				3	3	3	6.9	6.9	6.9	58.865	0	23.204	215940000	3	F1PU09	F1PU09
22748	25485	23656	29134	59264	61167				2	2	2	3.1	3.1	3.1	60.444	0	13.501	306700000	3	J9NSL6;F1PB08	J9NSL6;F1PB08
22236	17351	22078	20163	35393	31021				1	1	1	1.8	1.8	1.8	110.15	0	10.369	21874000	2	E2RAT8	E2RAT8
22077	28569	33492	97022	60431	53383			+	2	1	1	20.9	15.1	15.1	14.759	0	58.731	341060000	2	CON__ENSEMBL:ENSBTAP00000033053	CON__ENSEMBL:ENSBTAP00000033053
21951	32948	30626	30149	67867	93298				1	1	1	4.5	4.5	4.5	34.529	0	8.2866	149890000	1	E2RAT6	E2RAT6
21943	27087	29579	18994	39214	43224				2	2	2	28.9	28.9	28.9	9.1113	0	14.041	1030000000	2	E2RCL4	E2RCL4
21899	26018	37166	68674	41971	36318			+	2	2	2	8.1	8.1	8.1	38.252	0	10.941	793150000	2	CON__P17690	CON__P17690
21893	25865	30457	24904	30676	34425				2	2	2	5.1	5.1	5.1	79.773	0	14.194	277420000	2	Q3HTT4;F1PK66	Q3HTT4;F1PK66
21877	20253	20710	20860	29541	22892				3	3	3	6.6	6.6	6.6	63.865	0	24.822	185560000	4	L7N0H5;F1PSP7	L7N0H5;F1PSP7
21676	19364	20647	16471	35609	25420				18	1	1	60.9	4.6	4.6	41.38	0	11.994	82381000	1	F1PQL8;Q38QA2;J9P3P8;Q9GKL5	F1PQL8
21372	20142	20754	19307	36923	37134				1	1	1	3.4	3.4	3.4	36.454	0	8.0167	581270000	1	F1PPR0	F1PPR0
21248	18944	22104	28059	99062	90331				1	1	1	10.4	10.4	10.4	14.507	0	13.397	372710000	2	J9NRQ9;J9P938;F6Y016	J9NRQ9;J9P938;F6Y016
20780	15218	19266	4821.7	5286.2	4792.2				2	2	2	5	5	5	76.687	0	33.482	506660000	2	F1P625	F1P625
20556	22862	25154	21431	22379	26775				1	1	1	3.7	3.7	3.7	64.562	0.00086207	6.5939	93394000	1	E2RTM5	E2RTM5
20503	14237	17546	21730	39616	34250				4	4	4	18.7	18.7	18.7	30.981	0	69.951	714930000	4	E2RPY9	E2RPY9
20483	56313	60034	12651	23209	33774				2	2	2	7.5	7.5	7.5	41.025	0	15.785	2179100000	2	F1P789	F1P789
20354	19035	22102	27566	59855	41110				4	4	4	12.6	12.6	12.6	63.932	0	42.777	1076800000	4	E2REK3	E2REK3
20284	21877	25542	9785.7	14128	13907				2	2	2	5.6	5.6	5.6	56.686	0	16.448	212060000	2	F1PA88;E2RAY2	F1PA88;E2RAY2
20127	16226	17978	13743	23929	22991				1	1	1	10.3	10.3	10.3	19.718	0	12.76	107720000	1	J9P9U3;E2QWR5	J9P9U3;E2QWR5
19841	20838	23125	31470	50543	51470				1	1	1	1.2	1.2	1.2	91.859	0.0033031	6.2028	70844000	1	F1Q3E7	F1Q3E7
19666	21011	25624	14849	27663	27694				3	3	3	32.7	32.7	32.7	11.542	0	45.455	755270000	3	J9P1V7;F1Q414	J9P1V7
19438	14619	8175.9	3058.4	3930.6	5093.5				1	1	1	4.2	4.2	4.2	29.159	0.00088261	6.7588	16247000	1	F1PM72	F1PM72
19412	16593	18134	19522	38611	35355				1	1	1	12.7	12.7	12.7	12.46	0	13.173	92648000	1	J9P615;F1PJ50	J9P615;F1PJ50
19366	18073	20404	23498	30559	31829				1	1	1	1.9	1.9	1.9	103.4	0	7.945	104030000	1	F6UNY1	F6UNY1
19301	17169	16484	13467	29147	33351				2	2	2	14.5	14.5	14.5	18.814	0	12.151	1391300000	2	J9NVU2;E2RGQ5;F1PZ77	J9NVU2;E2RGQ5;F1PZ77
19091	11556	14367	15875	22609	20394				2	2	2	5.9	5.9	5.9	52.454	0	68.861	293630000	4	E2RL38	E2RL38
19062	15641	17352	16720	34090	35567				1	1	1	2.2	2.2	2.2	82.127	0	8.0751	49842000	1	F6UZV8	F6UZV8
18937	33837	34435	21265	41938	64322				1	1	1	5.6	5.6	5.6	26.379	0	9.2063	122320000	1	F1PQ43;F1PUN9	F1PQ43;F1PUN9
18300	26064	29111	20309	49472	49767				3	2	2	9.3	7.4	7.4	46.37	0	21.055	520500000	2	E2QRT0	E2QRT0
18180	24767	26165	36002	60418	62767				5	2	2	16.5	10.7	10.7	39.341	0	86.321	1555900000	7	F1PL63;F1PS82;Q28245	F1PL63;F1PS82
18077	22404	25023	41246	87162	85023				1	1	1	2.5	2.5	2.5	62.983	0	9.8417	105530000	1	E2R7A3;F1PY40	E2R7A3;F1PY40
17606	18896	19841	37101	90732	85645				2	2	2	5.1	5.1	5.1	67.02	0	27.851	117100000	2	E2RMA7;E2RM92	E2RMA7;E2RM92
17588	19100	22339	20320	34191	31242				1	1	1	3.2	3.2	3.2	45.096	0	6.8759	50235000	1	E2RRD1	E2RRD1
17467	13821	17083	6852.5	9983.2	9269.9				1	1	1	1.1	1.1	1.1	127.06	0	6.8759	18603000	1	J9NU50;F1PQ49	J9NU50;F1PQ49
17212	16429	18550	31118	64158	50853				1	1	1	2.5	2.5	2.5	51.175	0	7.7758	70431000	1	F1PBW1;J9NUL3	F1PBW1;J9NUL3
17200	14540	17253	19764	47541	45162				1	1	1	8.1	8.1	8.1	24.633	0	12.116	108200000	1	F6X571	F6X571
17162	21266	21476	30696	65962	72192		+		1	1	1	0	0	0	97.76	0.0072289	5.9088	2337900000	1	REV__J9P5L3;REV__E2RAS5	REV__J9P5L3;REV__E2RAS5
17067	15019	18751	11901	13576	14397				1	1	1	3.3	3.3	3.3	55.525	0	6.9439	18743000	1	F1PGB1	F1PGB1
17067	16255	20931	11103	20606	19476				10	2	2	34.4	8.8	8.8	49.906	0	60.626	859590000	3	F1PQ68;E2RFJ7	F1PQ68;E2RFJ7
16846	37083	40066	17085	24821	19741	+			1	1	1	0.3	0.3	0.3	451.63	1	-2	47047000	1	J9NWD8;E2QYQ5	J9NWD8;E2QYQ5
16795	14430	17249	25061	53976	55886				1	1	1	2.4	2.4	2.4	72.905	0	75.71	430640000	2	F1PMS4;F1P975	F1PMS4;F1P975
16718	15208	17740	14416	18708	16744				1	1	1	7.6	7.6	7.6	23.688	0	9.9767	59005000	1	J9P1Q9;F1Q0J0;F1Q0I8	J9P1Q9;F1Q0J0;F1Q0I8
16565	21564	26949	11590	24902	24414				1	1	1	1.3	1.3	1.3	146.03	0	19.506	439630000	2	J9NWY5;F1PCF2;B8K1W2	J9NWY5;F1PCF2;B8K1W2
16550	14821	16271	20215	53981	45158				5	5	2	16.9	16.9	8.8	34.917	0	92.968	1439500000	6	E2RCF9;J9P8W8;E2RCH9;E2QUE1;E2RCG0;E2RG64	E2RCF9;J9P8W8
16514	24663	24519	16157	41851	39714				2	2	2	7.1	7.1	7.1	43.802	0	15.66	90881000	2	E2QW49	E2QW49
16366	19987	20141	18470	31637	29584				1	1	1	1.7	1.7	1.7	86.022	0	6.9031	42385000	1	E2QWE3	E2QWE3
16320	13557	16056	16227	25811	23553				2	2	2	8.7	8.7	8.7	43.557	0	32.864	298240000	2	E2R273	E2R273
16306	20447	24878	68637	98609	96406				3	3	2	4.6	4.6	2.6	86.288	0	19.273	157620000	3	E2RS79	E2RS79
16298	9892.6	11116	14965	16950	13033			+	1	1	1	9.1	9.1	9.1	23.583	0	15.115	143120000	2	CON__P02666	CON__P02666
15863	14641	16089	13121	25143	22367				1	1	1	0.6	0.6	0.6	292.74	0.00088106	6.7519	26430000	1	J9NXV2;F1PUY0	J9NXV2;F1PUY0
15618	12574	15561	20157	26164	24816				1	1	1	5.4	5.4	5.4	37.915	0	10.57	141470000	1	J9P5H8;F1PQG3	J9P5H8;F1PQG3
15429	14847	17274	28697	46022	42932				6	3	3	12.9	6.5	6.5	73.59	0	43.176	487140000	3	F1P9U4	F1P9U4
15262	16380	18807	45962	105010	127520				2	2	2	15.8	15.8	15.8	11.847	0	12.112	1461700000	3	A0A346JM02;A0A346JM01;A0A4D5YIZ2	A0A346JM02;A0A346JM01;A0A4D5YIZ2
15170	22759	35216	13193	2235.4	2501				4	1	1	26.4	6.3	6.3	19.52	0	7.2741	6793200000	1	Q95LE0	Q95LE0
15156	15730	19556	143310	259610	175180				2	2	2	9	9	9	37.461	0	20.457	209890000	2	G1K2A7	G1K2A7
15145	24665	27779	12038	17438	17450				1	1	1	1.2	1.2	1.2	117.92	0	8.574	50613000	1	E2R529	E2R529
15011	28667	32089	42875	100270	153560		+		1	1	1	0	0	0	32.217	0.0048662	5.9851	200470000	1	REV__J9NYT3;REV__J9NU79;REV__E2RLQ4	REV__J9NYT3;REV__J9NU79;REV__E2RLQ4
14921	11539	13216	5722.1	7775.9	8495.7				2	2	2	6.6	6.6	6.6	50.599	0	82.537	912910000	2	E2RRW6;F1PL20	E2RRW6;F1PL20
14903	16615	16082	14984	45606	51538				2	2	2	13.9	13.9	13.9	25.263	0	25.218	187790000	3	F1PGI9;J9NSE8	F1PGI9;J9NSE8
14849	16893	18824	21593	34543	29718				1	1	1	1.2	1.2	1.2	127.05	0	10.157	61855000	1	F6V8H1	F6V8H1
14472	15227	17193	22625	24100	23565				3	3	3	12.1	12.1	12.1	55.088	0	28.341	187820000	3	J9NZX7;F1Q2T9	J9NZX7
14455	21674	24784	23550	27774	29806				3	3	3	9.2	9.2	9.2	50.637	0	17.414	1311000000	3	E2R7F2;J9JHD9	E2R7F2;J9JHD9
14245	14807	14338	22995	65365	59365				1	1	1	3.5	3.5	3.5	39.621	0	7.8863	267940000	1	F1PTE0;F1PEZ0	F1PTE0;F1PEZ0
14170	18516	21195	17387	29480	27729				2	2	2	5.3	5.3	5.3	68.401	0	20.707	197630000	2	E2QYG6	E2QYG6
13855	17532	19441	10511	17180	19818				4	4	4	11.1	11.1	11.1	56.75	0	49.785	516870000	4	E2RD86	E2RD86
13756	49301	43947	24722	21183	32628		+		1	1	1	0	0	0	162.57	0.008793	5.8341	71083000	1	REV__F1P8R2	REV__F1P8R2
13743	20731	25292	4901.5	4988.3	4487.8				2	2	2	7.8	7.8	7.8	51.061	0	43.948	444650000	2	F1PG57	F1PG57
13601	17999	20465	4803.3	7663.4	6556.8				2	2	2	4.3	4.3	4.3	52.694	0	97.453	634910000	3	K0J2W9	K0J2W9
13524	12719	15281	20241	17715	17610				1	1	1	8.2	8.2	8.2	30.43	0	9.8689	345290000	1	J9NZP4;E2RSH4	J9NZP4;E2RSH4
13439	16866	17431	10534	10375	10945				1	1	1	4.3	4.3	4.3	41.12	0	24.926	337460000	1	J9P4N9	J9P4N9
13194	14319	17924	36090	28973	25265			+	1	1	1	9.2	9.2	9.2	54.678	0	7.0481	628680000	1	CON__ENSEMBL:ENSBTAP00000031360	CON__ENSEMBL:ENSBTAP00000031360
13168	14928	12799	9205.4	37292	18216				1	1	1	3.9	3.9	3.9	44.42	0	13.231	65581000	1	J9PBI1;E2RKQ1	J9PBI1;E2RKQ1
12800	15767	16122	13633	23864	22798				2	2	2	9.5	9.5	9.5	27.196	0	25.463	643900000	3	V5KXV2;F6XR14	V5KXV2;F6XR14
12721	12548	12332	7225.2	13316	12621				3	1	1	3.4	1.3	1.3	111.21	0	18.92	32621000	1	F1PZ09	F1PZ09
12672	12735	11841	28549	33570	36970				1	1	1	1.9	1.9	1.9	79.552	0	9.6417	100380000	1	F1PHW5;F1PHX2	F1PHW5;F1PHX2
12371	10043	7535.2	13981	32793	36458				1	1	1	2	2	2	51.596	0	11.908	45714000	2	E2REA8	E2REA8
12345	21610	25699	55996	36360	42605				1	1	1	27.7	27.7	27.7	5.316	0.0048426	5.9494	1075900000	1	Q9XSS9	Q9XSS9
12165	8812	4067.3	5943.5	11867	12785				2	2	2	2.2	2.2	2.2	92.733	0	18.331	14498000	2	E2RHY0	E2RHY0
12133	16118	18844	16108	30100	28611				2	2	2	7.3	7.3	7.3	43.741	0	12.374	242120000	2	J9P8J3;E2RA50;E2RJ54	J9P8J3;E2RA50;E2RJ54
12004	12082	14253	14375	21996	19881				1	1	1	4	4	4	61.185	0	16.497	432040000	1	E2QUV5	E2QUV5
11562	9248.3	4638.9	6869.1	24795	20621				1	1	1	4.2	4.2	4.2	30.552	0	36.54	31508000	1	J9PAW9;F1PBG7	J9PAW9;F1PBG7
11494	12149	13616	16920	17318	14993			+	1	1	1	6.1	6.1	6.1	38.756	0	8.1937	347860000	1	CON__Q05443	CON__Q05443
11278	14878	14675	13563	16988	21575				2	2	2	4.8	4.8	4.8	46.807	0	10.558	328430000	2	F1PZA1;Q0QEQ8	F1PZA1;Q0QEQ8
11233	12602	15609	11134	32816	30290				1	1	1	2.4	2.4	2.4	87.565	0.00085911	6.5343	95991000	1	F1PRL0	F1PRL0
11163	14219	16119	24272	21879	19057			+	3	3	3	11.1	11.1	11.1	61.998	0	37.432	135570000	3	CON__Q3MHN2	CON__Q3MHN2
10964	10074	12570	15252	18552	16149				2	2	2	9.6	9.6	9.6	42.681	0	26.43	809650000	4	J9P4X0;E2RPY1	J9P4X0;E2RPY1
10945	11798	13449	11061	11755	13378				1	1	1	1.9	1.9	1.9	134.1	0	16.111	101680000	1	F1P9K1	F1P9K1
10927	9700.8	11316	15000	20966	18530				1	1	1	8.3	8.3	8.3	26.401	0	10.618	36420000	1	J9PAY5;F1PFB4	J9PAY5;F1PFB4
10838	7275.9	9259.3	7399.1	8540.7	7658.2				2	2	2	1.1	1.1	1.1	261.13	0	18.512	45336000	2	J9P8T8;E2RNG4	J9P8T8;E2RNG4
10530	8188	10324	9147.3	11625	11600				1	1	1	2.8	2.8	2.8	82.413	0	16.505	79628000	1	F6V659	F6V659
10526	7380	4092.2	726.59	688.34	821.68				1	1	1	1	1	1	133.78	0	7.9144	104870000	1	E2QUR0	E2QUR0
10517	12640	13222	13717	17521	18410				2	2	2	11.7	11.7	11.7	33.508	0	25.931	330760000	2	F1P7P3;J9NWK5	F1P7P3;J9NWK5
10424	7666.8	7907.5	16150	35738	28970				5	1	1	40.4	23.5	23.5	15.404	0	21.525	624420000	5	J9PB22	J9PB22
10388	12938	13936	19706	29597	30775				1	1	1	8.1	8.1	8.1	30.945	0	16.304	63809000	1	J9NX01;E2R334	J9NX01;E2R334
10347	10226	12443	33508	120500	82086				1	1	1	1.8	1.8	1.8	74.479	0	13.063	267170000	2	J9P8K2	J9P8K2
10195	9329.4	11144	11686	20733	19772				1	1	1	1.7	1.7	1.7	110.56	0	12.108	478520000	1	F1Q1V0	F1Q1V0
9960.3	12945	16428	58074	150400	113510				7	2	2	11.9	5.1	5.1	77.933	0	44.92	1428600000	4	F1PLV6	F1PLV6
9848.4	11537	11278	17143	31267	28378				2	2	2	9.4	9.4	9.4	153.02	0	13.347	155380000	2	E2RL02;E2RAB2	E2RL02;E2RAB2
9804.6	10050	12667	5464.9	9311.8	10882				2	2	2	5	5	5	45.092	0	13.428	92782000	2	J9NYN4;E2RL53	J9NYN4;E2RL53
9708	10411	13886	13251	55584	27748				2	2	2	17	17	17	18.658	0	17.269	1653900000	2	Q5I4H7;F1PXM1;J9NX67	Q5I4H7;F1PXM1;J9NX67
9662.1	9925.9	10372	12295	22169	20102				2	2	2	1.4	1.4	1.4	202.97	0	14.119	103380000	2	F1PYA6	F1PYA6
9555	14809	16579	19641	85162	80271				2	2	2	10.3	10.3	10.3	28.329	0	13.242	417230000	2	E2RJL3	E2RJL3
9362	10892	12937	12068	16714	15883				1	1	1	3.3	3.3	3.3	55.889	0	7.5624	34174000	1	F1PWG0	F1PWG0
9304.6	11119	11509	22633	24472	33890				2	2	2	5.9	5.9	5.9	56.498	0	19.986	229610000	2	E2RH71	E2RH71
8962.1	7819.9	8046.9	6432.5	8268	7728.4				3	3	3	4.6	4.6	4.6	103.44	0	26.472	751810000	4	F1PCU2;E2RD72;E2RM73	F1PCU2;E2RD72
8935.5	8749.6	9443.8	9533.1	14125	13807				1	1	1	4.9	4.9	4.9	56.499	0	17.861	44812000	1	Q38JA9	Q38JA9
8721.4	7676.3	9747.3	10312	19027	15985				1	1	1	2.4	2.4	2.4	89.66	0	11.204	33811000	1	E2R1V2	E2R1V2
8631.5	7438.2	8444.8	5741.8	6300.9	6107.1				1	1	1	17.2	17.2	17.2	10.712	0	9.2344	22657000	1	Q6JDJ2;J9NWX6;F1PSU6	Q6JDJ2;J9NWX6;F1PSU6
8597.2	46142	74968	26061	18340	34949	+			1	1	1	0.5	0.5	0.5	210.7	1	-2	180130000	1	F1P7Q1	F1P7Q1
8544.1	11329	13293	10697	19994	20860				1	1	1	4.7	4.7	4.7	36.075	0	6.9692	93952000	1	F1Q1P7	F1Q1P7
8511.5	8879.7	10382	12531	18100	17047				1	1	1	4.8	4.8	4.8	55.835	0	23.935	344810000	1	E2RHZ8	E2RHZ8
8358.2	12943	14745	3622.4	5926.8	7785.2				2	2	2	5.8	5.8	5.8	40.691	0	20.47	53356000	2	E2R2Z8;F1PKF1	E2R2Z8;F1PKF1
8056.5	6508.1	8073.4	6787.3	9400.8	9310.1				3	3	3	12.2	12.2	12.2	53.637	0	49.777	516970000	3	F1P732	F1P732
7908.3	6569.7	6607.3	4385.4	8273.4	8498.2				1	1	1	2.2	2.2	2.2	55.813	0.00087489	6.698	11963000	1	E2RI60	E2RI60
7688.3	5568.4	3467.7	8462.5	26864	35951				1	1	1	2.2	2.2	2.2	51.74	0	32.508	19934000	1	F1PBK4;J9P3G1	F1PBK4;J9P3G1
7655.4	6076.9	7656.1	9183.9	8506.1	7848.1				1	1	1	3.8	3.8	3.8	55.117	0	11.917	63911000	1	E2RKU5	E2RKU5
7607.5	8485	9766.6	8530.3	10400	10916				1	1	1	4.5	4.5	4.5	38.369	0	9.5734	44911000	1	F6V5M4	F6V5M4
7531.1	8262.5	9579.3	3985.6	6387.4	6013				2	2	2	8.8	8.8	8.8	27.583	0	13.741	205340000	2	F6XLZ4	F6XLZ4
7357.3	7693.1	9210.8	5559.9	11300	9677.7				1	1	1	2.9	2.9	2.9	100.86	0	9.9583	39915000	1	F6XD28	F6XD28
7301.4	7191.2	10156	21321	25050	20751				4	1	1	24.4	8.8	8.8	27.931	0	18.928	204750000	1	E2RF52	E2RF52
7241.2	7921.2	8285.2	8927.3	14240	14455				2	2	2	2.4	2.4	2.4	96.341	0	11.386	226820000	2	F1P9P5	F1P9P5
7215.8	6675.5	7321.2	4105.7	8821.9	6280.1				1	1	1	2	2	2	60.054	0	9.1688	21581000	1	F1P7F8	F1P7F8
7014.8	6155.6	6589.1	6068.4	9195.2	8444.3				1	1	1	2.5	2.5	2.5	83.446	0	19.917	18895000	1	J9NVL3;J9P5F3;E2RMX9	J9NVL3;J9P5F3;E2RMX9
6974.8	12531	14519	59552	20673	32681		+		1	1	1	0	0	0	32.974	0.00088652	6.8202	790200000	1	REV__A0A3B0ITJ5;REV__F1PPL9	REV__A0A3B0ITJ5;REV__F1PPL9
6952.8	7098.3	8542.7	13252	11338	11074			+	1	1	1	4.6	4.6	4.6	51.988	0	23.757	73669000	1	CON__ENSEMBL:ENSBTAP00000013050	CON__ENSEMBL:ENSBTAP00000013050
6606	5889.2	7087.4	6154.4	8615	8807.3				1	1	1	5.2	5.2	5.2	48.146	0	23.704	89771000	1	F1P926	F1P926
6496.6	8896.6	10423	33905	18483	15504			+	1	1	1	4	4	4	42.416	0	8.5682	1952300000	1	F6XTZ1;E2RNG3;CON__Q2KJ83	F6XTZ1;E2RNG3;CON__Q2KJ83
6458.9	7336.3	8842.2	9942.4	9855.5	9836.1				2	2	2	6.3	6.3	6.3	84.318	0	17.226	239860000	2	F1P7Y6	F1P7Y6
6446.9	6625.6	6968	5941.3	6898.7	8622.1				1	1	1	1.7	1.7	1.7	121.09	0	10.633	24076000	1	F1PVY2	F1PVY2
6294.9	6787.2	8231.7	2254.4	2933.7	3712.3				4	2	2	31.1	17.9	17.9	22.137	0	21.971	227320000	2	J9NUD2	J9NUD2
6206.3	7661.1	8655.8	5855.2	7609.2	7373				2	1	1	11.8	7.5	7.5	28.185	0	15.003	82484000	1	E2R020	E2R020
5874.1	7479.8	8611.1	14861	25473	24235				1	1	1	0.6	0.6	0.6	210.52	0	7.4883	26651000	1	E2R6Z2	E2R6Z2
5742.6	5253.3	6542.9	8486.3	50195	39248				1	1	1	1.8	1.8	1.8	109.06	0	15.749	58512000	2	E2R7P6	E2R7P6
5694.6	6314.5	6664.7	7217.1	8594.2	9193.6				1	1	1	2.7	2.7	2.7	71.008	0	8.8656	35829000	1	E2QZ13	E2QZ13
5655.9	6032.1	4471.6	2340.7	4828.6	5439.5				1	1	1	1.7	1.7	1.7	98.754	0	13.444	9451500	1	I3RSH9;E2RBA6	I3RSH9;E2RBA6
5532.6	11072	14680	7675.5	20222	19962				1	1	1	1.2	1.2	1.2	120.82	0.0008673	6.6205	50842000	1	E2RAT5	E2RAT5
5473	7360.6	8749.3	7649.6	10945	9650.2				2	2	2	0.7	0.7	0.7	542.02	0	22.641	204900000	2	E2RR85	E2RR85
5371	9085.4	10382	10469	80692	54310				2	2	2	7.9	7.9	7.9	42.982	0	19.081	248790000	2	E2RHX1;J9P2X7	E2RHX1;J9P2X7
5027.5	4985	5541.7	7028.4	12660	11321				2	2	2	5.4	5.4	5.4	78.233	0	29.184	193260000	2	J9NZA2;J9NRH1;E2QXL2	J9NZA2;J9NRH1;E2QXL2
4909.3	3663.3	4835.8	11456	10857	9374.6				1	1	1	2	2	2	93.554	0	10.28	230550000	1	F1P787;F1P783	F1P787;F1P783
4900	4369	4694.2	5890	15497	16674				1	1	1	3.1	3.1	3.1	45.182	0	28.835	16168000	1	F6UMY5	F6UMY5
4864.5	5168.9	2708.2	1677.9	3754.5	5216.1				1	1	1	1.2	1.2	1.2	94.551	0.0087719	5.8258	3531400	1	E2R1D2	E2R1D2
4859.3	5823.2	6982.7	4679	5899.5	6383.3				2	2	2	8.2	8.2	8.2	51.043	0	17.548	251200000	2	J9P2T7;F1P7L2	J9P2T7;F1P7L2
4465.1	6829.1	9411	44264	65071	47224				1	1	1	0.7	0.7	0.7	134.88	0.0017167	6.5159	68744000	1	F1PBX4;E2R8U5	F1PBX4;E2R8U5
4377.4	3091.3	3268.9	2493.1	2448.5	2463				8	1	1	54.4	15	15	20.591	0	17.291	49942000	1	E2RNQ7;J9NXN8;J9P2Y8	E2RNQ7;J9NXN8;J9P2Y8
4132.4	1223.6	1558.6	6231.9	4390.8	2096.2				2	2	2	1.2	1.2	1.2	289.15	0	20.874	61606000	2	F6V9A6;F1PR39;F1PR31;Q4KKT6	F6V9A6;F1PR39;F1PR31;Q4KKT6
4001.1	4919.8	5396.4	4737	5253.2	4925.5				3	1	1	13.8	7.2	7.2	45.634	0	16.197	76794000	1	E2RB90	E2RB90
3918.5	3731	4762.6	4183.3	5770.9	5803.5				6	4	4	3.5	2.5	2.5	281.21	0	40.66	651250000	4	E2R0F2	E2R0F2
3892.9	5632.3	5727	6241.2	10369	11122				2	2	2	2.3	2.3	2.3	123.94	0	18.267	169170000	2	E2RH14;J9P5X6;J9P0Z1	E2RH14;J9P5X6;J9P0Z1
3745.1	4308.7	5231.2	3545.2	4058.3	3254.2				2	2	2	23.3	23.3	23.3	13.439	0	16.643	294430000	3	E2R8M4;D7F605	E2R8M4;D7F605
3620.3	3801.1	4862.4	4065.8	4498.5	4788				1	1	1	1.4	1.4	1.4	194.49	0	11.19	16370000	1	E2RPP4	E2RPP4
3418.9	2440.8	1667.9	2621.2	6518.1	6043.1				1	1	1	8.5	8.5	8.5	26.646	0	17.057	16993000	1	J9NWC1;F1PF62	J9NWC1;F1PF62
3385.9	4008.7	5311.9	4389.8	5330	5484.9				2	2	2	11.4	11.4	11.4	56.578	0	18.425	541090000	3	E2RAC6	E2RAC6
3299	3815.5	4286.3	7202.8	13350	12453				2	2	2	5.7	5.7	5.7	55.074	0	21.516	228340000	2	E2R311	E2R311
3069.7	3190.8	3616.8	3466	5626.1	5267.4				7	7	7	32.7	32.7	32.7	27.974	0	70.752	621660000	8	E2RM61	E2RM61
3065.3	5230.5	2499.5	540.64	1043.4	1010.4				1	1	1	1.9	1.9	1.9	64.182	0	6.823	1429100	1	E2RE16	E2RE16
3058.4	3324.9	3572.3	4670.4	5180.7	5473.9				2	2	2	3	3	3	134.23	0	27.915	258500000	2	F1PZP6	F1PZP6
2974	5541.4	6273.2	1872.5	3198.8	3453.5				1	1	1	0.8	0.8	0.8	150.52	0.00086655	6.6189	17023000	2	F1PUS7;F1PUS0	F1PUS7;F1PUS0
2971.6	2564.9	3928.4	5880.4	5045.5	5317				1	1	1	4.1	4.1	4.1	75.16	0	6.8721	34369000	1	F1PZ86	F1PZ86
2811.5	2167.7	1455.8	3161.5	11537	11417				1	1	1	1.1	1.1	1.1	95.377	0	7.2093	7826500	1	E2R680	E2R680
2745.1	3581.4	3662.9	3618.6	4762	5654.9				3	1	1	22.5	9.3	9.3	16.894	0	13.205	1501000000	1	J9P9D9;J9NWI3	J9P9D9
2676.5	4635.1	6240.8	5530.5	19582	16048				2	2	2	8.2	8.2	8.2	64.075	0	38.025	429660000	2	E2R944	E2R944
2651.1	2573.3	3198.9	4257.1	4067.7	3772.6				1	1	1	11.5	11.5	11.5	25.455	0	10.072	16826000	1	E2QXV3	E2QXV3
2534.4	3172.3	2936.8	3230.8	6611.3	5942.2				2	2	2	1.9	1.9	1.9	164.69	0	13.122	58940000	2	F1PL65;E2RS52	F1PL65;E2RS52
2458.7	2805.3	3357.7	4070.1	15861	16852				2	2	2	10.5	10.5	10.5	38.371	0	22.351	97114000	2	F1PZ47	F1PZ47
2430	2535.2	2770.5	3211.2	6470.3	4971.8				1	1	1	18.2	18.2	18.2	9.6798	0	7.4626	934600000	1	J9P4N2	J9P4N2
2184.7	2565.6	2293.7	2078.6	3550.3	3635.8				2	2	2	4.3	4.3	4.3	110.45	0	18.883	204950000	2	J9P2E5;E3TH10;J9NXW9;E2QXJ7	J9P2E5;E3TH10;J9NXW9;E2QXJ7
2044.8	2596.1	7749.2	164910	170570	136980				1	1	1	4	4	4	37.268	0.0033167	6.2518	248100000	1	F1PXB0	F1PXB0
1963.6	2334.4	2121.9	3352.3	6872.1	7157.5				2	2	2	1.7	1.7	1.7	159.89	0	18.673	459600000	2	F1PSL9;E2RJF8	F1PSL9;E2RJF8
1551	1804.4	913.22	2251.4	9838.9	10430				1	1	1	0.3	0.3	0.3	482.14	0	12.968	28319000	1	F6XM35;F6XKL7	F6XM35;F6XKL7
1493.6	2648.2	3351.1	2948.2	16688	17576				3	3	3	29.2	29.2	29.2	10.679	0	27.116	794700000	3	Q6UQF9;Q6UQF0;G1K277;Q2TUW3	Q6UQF9;Q6UQF0;G1K277
1127.9	848.96	923.52	1398.2	2949.6	3468.5				1	1	1	6.3	6.3	6.3	28.744	0	8.9449	2845700	1	J9PB98	J9PB98
1049.9	789.17	1106.7	1043.2	2561.5	2330.3				1	1	1	4.9	4.9	4.9	32.944	0	8.505	7007700	1	F1PF61	F1PF61
895.14	1074.7	783.13	232.5	534.31	321.93				2	2	2	2.1	2.1	2.1	119.19	0	11.247	233720000	4	E2RGQ1;E2RGP8	E2RGQ1;E2RGP8
888.54	1045.5	895.28	1369.6	1670.8	1877.3				1	1	1	1.6	1.6	1.6	92.537	0.0048622	5.9781	30171000	1	F6UYN9	F6UYN9
781.24	635.54	611.16	1492.8	1626.8	1369.5				5	1	1	40.4	23.5	23.5	15.388	0	15.966	28886000	4	J9P7X1	J9P7X1
589.86	352.08	490.09	121.77	248.49	264.53				1	1	1	2	2	2	126.93	0	9.6232	3178800	1	E2RAV0	E2RAV0
581.45	278.52	522.56	849.25	1791.2	1546.2				1	1	1	4.1	4.1	4.1	59.22	0	23.939	9768400	1	E2R3U9	E2R3U9
539.55	628.36	1067.2	8730.8	4013.8	3064.8				1	1	1	2	2	2	107.81	0	8.8424	30834000	1	E2R8C6;J9P5F1	E2R8C6;J9P5F1
458.14	701.32	557.2	715.6	1511.4	998.53				1	1	1	1.5	1.5	1.5	87.169	0	7.2027	1916600	1	J9P3C1;F1PV44	J9P3C1;F1PV44
94.581	166.45	139.94	654.82	14306	1830.8				1	1	1	0.3	0.3	0.3	404.49	0	8.9057	5004400	2	F1P9U6;J9NZY1;J9P6T8	F1P9U6;J9NZY1;J9P6T8
0	0	0	0	0	0				3	1	1	26.5	11	11	20.595	0	15.787	43901000	2	A0A1B4XK92	A0A1B4XK92
0	0	0	0	0	0				1	1	1	5.9	5.9	5.9	50.585	0	12.943	42447000	2	A4GT58	A4GT58
0	0	0	0	0	0				1	1	1	2.9	2.9	2.9	45.591	0.0025338	6.3854	29620000	1	F1PA99;J9NY30;B2BMP5	F1PA99;J9NY30;B2BMP5
0	0	0	0	0	0			+	2	2	2	3.5	3.5	3.5	80.674	0	12.317	595360000	2	CON__ENSEMBL:ENSBTAP00000006074;E2RJE0;F1PSS2	CON__ENSEMBL:ENSBTAP00000006074;E2RJE0;F1PSS2
0	0	0	0	0	0			+	2	1	1	21.2	15.3	15.3	14.629	0	11.355	340710000	1	CON__ENSEMBL:ENSBTAP00000011227	CON__ENSEMBL:ENSBTAP00000011227
0	0	0	0	0	0			+	1	1	1	3.6	3.6	3.6	46.017	0	7.407	81088000	1	CON__ENSEMBL:ENSBTAP00000023402	CON__ENSEMBL:ENSBTAP00000023402
0	0	0	0	0	0			+	5	1	1	8.9	2.6	2.6	68.964	0	38.12	0	1	CON__Q2KJ62;CON__P01044-1	CON__Q2KJ62;CON__P01044-1
0	0	0	0	0	0			+	1	1	1	5.3	5.3	5.3	24.348	0.0056406	5.9415	136660000	1	CON__P02663	CON__P02663
0	0	0	0	0	0			+	2	2	2	2.8	2.8	2.8	93.089	0	12.19	316410000	2	CON__Q29RQ1;E2RG01	CON__Q29RQ1;E2RG01
0	0	0	0	0	0			+	4	2	2	6.9	4.5	4.5	69.182	0	11.904	103210000	2	CON__Q2HJF0;J9JHX7;E2QZQ1	CON__Q2HJF0;J9JHX7;E2QZQ1
0	0	0	0	0	0			+	1	1	1	2.6	2.6	2.6	38.348	0	10.947	0	1	CON__Q2KIF2	CON__Q2KIF2
0	0	0	0	0	0			+	1	1	1	3.1	3.1	3.1	29.091	0.0040883	6.0598	587780000	1	CON__Q2KIH2	CON__Q2KIH2
0	0	0	0	0	0				1	1	1	1.8	1.8	1.8	91.706	0.0033113	6.2314	248180000	1	E2QRX1	E2QRX1
0	0	0	0	0	0				1	1	1	7.2	7.2	7.2	16.895	0.008751	5.7903	0	1	E2QTL3	E2QTL3
0	0	0	0	0	0				1	1	1	1.2	1.2	1.2	122.72	0	8.2981	13762000	1	E2QUH1	E2QUH1
0	0	0	0	0	0				1	1	1	2.7	2.7	2.7	66.707	0.0025168	6.3413	24759000	1	E2QUQ3	E2QUQ3
0	0	0	0	0	0				2	2	2	3.6	3.6	3.6	74.602	0	12.489	132750000	2	E2QUQ6	E2QUQ6
0	0	0	0	0	0				2	2	2	6.3	6.3	6.3	35.613	0	11.163	510650000	2	E2QUT9	E2QUT9
0	0	0	0	0	0				1	1	1	16	16	16	9.0604	0	9.6498	40837000	1	E2QUY2	E2QUY2
0	0	0	0	0	0				1	1	1	1.1	1.1	1.1	161.5	0	7.0293	33035000	1	J9P4Q6;J9NZ30;E2QWJ0	J9P4Q6;J9NZ30;E2QWJ0
0	0	0	0	0	0				1	1	1	8.4	8.4	8.4	21.188	0	7.4139	54179000	1	E2QWK8	E2QWK8
0	0	0	0	0	0				1	1	1	7.2	7.2	7.2	26.762	0.00087719	6.733	229280000	1	E2QWS2	E2QWS2
0	0	0	0	0	0				1	1	1	4.3	4.3	4.3	31.136	0.0056452	5.944	103380000	1	E2RH59;E2QX53	E2RH59;E2QX53
0	0	0	0	0	0				1	1	1	2.5	2.5	2.5	67.694	0	7.3517	82182000	1	F1PT27;F1PT28;E2QXM6	F1PT27;F1PT28;E2QXM6
0	0	0	0	0	0				1	1	1	2.4	2.4	2.4	58.891	0	7.2845	372760000	2	E2QXU5	E2QXU5
0	0	0	0	0	0				1	1	1	0.9	0.9	0.9	137.09	0	7.8731	162540000	1	E2QXV5	E2QXV5
0	0	0	0	0	0				1	1	1	2.4	2.4	2.4	52.374	0.0016964	6.4694	160640000	1	E2QY42;E2RG82	E2QY42;E2RG82
0	0	0	0	0	0	+			1	1	1	1.7	1.7	1.7	55.929	1	-2	367980000	1	S5U7Q1;E2RHJ6;E2QYI1;J9PA47	S5U7Q1;E2RHJ6;E2QYI1;J9PA47
0	0	0	0	0	0				1	1	1	7.1	7.1	7.1	25.226	0	7.1254	28571000	1	E2QYL0	E2QYL0
0	0	0	0	0	0				1	1	1	3.3	3.3	3.3	57.216	0.0032976	6.1823	100620000	1	E2QZV5	E2QZV5
0	0	0	0	0	0				1	1	1	2.8	2.8	2.8	88.65	0.0040783	6.0239	49486000	1	E2R0Z0	E2R0Z0
0	0	0	0	0	0				1	1	1	3.9	3.9	3.9	66.998	0	12.145	272310000	2	E2R141	E2R141
0	0	0	0	0	0				1	1	1	1.6	1.6	1.6	91.851	0.0040717	6.0114	10004000	1	E2R186	E2R186
0	0	0	0	0	0				1	1	1	5.2	5.2	5.2	37.762	0	8.0166	170970000	1	E2R231;W0RY37	E2R231;W0RY37
0	0	0	0	0	0				1	1	1	2.8	2.8	2.8	43.246	0	7.3141	261250000	1	E2R4C1	E2R4C1
0	0	0	0	0	0				2	2	2	2.5	2.5	2.5	110.07	0	12.347	200350000	2	J9P2A6;E2R4G4	J9P2A6;E2R4G4
0	0	0	0	0	0				1	1	1	2.1	2.1	2.1	59.379	0.00088496	6.7883	119280000	1	E2R4L0	E2R4L0
0	0	0	0	0	0				1	1	1	5.1	5.1	5.1	41.21	0.0024917	6.28	68938000	1	E2R587;E2RG22	E2R587;E2RG22
0	0	0	0	0	0				1	1	1	1.2	1.2	1.2	81.915	0	10.434	0	1	E2R5F1	E2R5F1
0	0	0	0	0	0				2	2	2	13.2	13.2	13.2	22.402	0	11.68	546440000	2	J9P8V7;E2R5M5;J9NUJ4	J9P8V7;E2R5M5;J9NUJ4
0	0	0	0	0	0				1	1	1	2.1	2.1	2.1	54.145	0.00087108	6.6484	112390000	1	Q95KP5;E2R7J9;Q95KU4	Q95KP5;E2R7J9;Q95KU4
0	0	0	0	0	0				2	2	2	2.5	2.5	2.5	116.51	0	12.893	182800000	2	E2R887;J9NT58;J9NVI7;J9P0X6;F1PLC1	E2R887;J9NT58;J9NVI7;J9P0X6;F1PLC1
0	0	0	0	0	0				1	1	1	4.4	4.4	4.4	31.263	0.0016992	6.4813	64045000	1	E2R8E5	E2R8E5
0	0	0	0	0	0				1	1	1	0.8	0.8	0.8	120.51	0.00086281	6.5944	97453000	1	J9NVR7;E2R9E3	J9NVR7;E2R9E3
0	0	0	0	0	0				3	2	2	7.3	5.6	5.6	59.185	0	18.643	35577000	2	E2R9N5	E2R9N5
0	0	0	0	0	0				1	1	1	2	2	2	69.642	0.0041085	6.1011	124610000	1	E2R9U8	E2R9U8
0	0	0	0	0	0	+			1	1	1	0.4	0.4	0.4	406.44	1	-2	0	1	E2RBC5	E2RBC5
0	0	0	0	0	0				1	1	1	2	2	2	50.402	0.00086806	6.6297	101310000	1	E2RBJ1	E2RBJ1
0	0	0	0	0	0				1	1	1	8.6	8.6	8.6	38.532	0	9.7531	46925000	1	E2RBU1	E2RBU1
0	0	0	0	0	0				1	1	1	11.7	11.7	11.7	17.394	0	7.8605	57026000	1	E2RC92	E2RC92
0	0	0	0	0	0				1	1	1	2.2	2.2	2.2	54.698	0.0041152	6.1634	15050000	1	E2RCG1	E2RCG1
0	0	0	0	0	0				1	1	1	2.4	2.4	2.4	68.972	0	6.9801	21427000	1	J9NZJ6;E2RCL7	J9NZJ6;E2RCL7
0	0	0	0	0	0				2	2	2	2.4	2.4	2.4	92.82	0	13.886	330990000	2	E2RCW6	E2RCW6
0	0	0	0	0	0				1	1	1	4.9	4.9	4.9	33.621	0.0080064	5.874	148640000	1	E2RD37	E2RD37
0	0	0	0	0	0				2	1	1	3.9	2.1	2.1	70.942	0	9.1298	103350000	1	E2RE36	E2RE36
0	0	0	0	0	0				1	1	1	7.5	7.5	7.5	26.57	0.002521	6.3521	0	1	E2RE39	E2RE39
0	0	0	0	0	0				1	1	1	3.1	3.1	3.1	64.799	0	12.34	112750000	1	E2REJ7	E2REJ7
0	0	0	0	0	0				2	2	1	1.8	1.8	1.2	117.82	0	9.4977	0	1	E2REU8	E2REU8
0	0	0	0	0	0				1	1	1	3.2	3.2	3.2	64.969	0	10.938	51879000	1	E2RF16	E2RF16
0	0	0	0	0	0				1	1	1	6.6	6.6	6.6	28.032	0.0017007	6.4842	0	1	J9P858;E2RFC7	J9P858;E2RFC7
0	0	0	0	0	0				1	1	1	2.3	2.3	2.3	94.518	0	9.2055	17458000	1	E2RFM0	E2RFM0
0	0	0	0	0	0				1	1	1	1.2	1.2	1.2	156.56	0	8.797	0	1	E2RG27;E2RG59	E2RG27;E2RG59
0	0	0	0	0	0				2	2	2	1.8	1.8	1.8	136.26	0	11.344	197890000	2	J9P227;E2RG72	J9P227;E2RG72
0	0	0	0	0	0				2	1	1	1.3	1	1	289.21	0	8.2178	19085000	1	E2RGH9	E2RGH9
0	0	0	0	0	0				1	1	1	4.5	4.5	4.5	22.733	0	7.9173	0	1	E2RGZ5	E2RGZ5
0	0	0	0	0	0				1	1	1	1.8	1.8	1.8	63.023	0.0056361	5.9363	103560000	1	E2RHR7	E2RHR7
0	0	0	0	0	0				2	2	2	14.8	14.8	14.8	28.024	0	32.358	106880000	2	E2RIA8	E2RIA8
0	0	0	0	0	0	+			1	1	1	3.6	3.6	3.6	25.162	1	-2	0	1	E2RIU2	E2RIU2
0	0	0	0	0	0				1	1	1	9.2	9.2	9.2	13.281	0.0017094	6.4959	146420000	1	E2RIW7	E2RIW7
0	0	0	0	0	0				3	3	3	9.2	9.2	9.2	67.927	0	22.438	206820000	3	E2RJ12	E2RJ12
0	0	0	0	0	0				1	1	1	6.5	6.5	6.5	44.786	0	10.012	22003000	1	J9P6K9;Q863Z3;F1PNC0;F2Z4P5;E2RJ59;F1PNC1	J9P6K9;Q863Z3;F1PNC0;F2Z4P5;E2RJ59;F1PNC1
0	0	0	0	0	0				1	1	1	1.4	1.4	1.4	72.341	0.0025126	6.3299	266620000	1	E2RJ60;F1PID8	E2RJ60;F1PID8
0	0	0	0	0	0				1	1	1	7.1	7.1	7.1	22.056	0	7.0105	692350000	1	E2RJB9	E2RJB9
0	0	0	0	0	0				1	1	1	4	4	4	33.601	0	14.572	0	1	J9NRU2;E2RJY4	J9NRU2;E2RJY4
0	0	0	0	0	0				1	1	1	8	8	8	20.76	0	6.8488	69253000	1	E2RK29;E2RNW6	E2RK29;E2RNW6
0	0	0	0	0	0				1	1	1	5.3	5.3	5.3	42.817	0	8.0254	88154000	1	E2RKJ6	E2RKJ6
0	0	0	0	0	0				1	1	1	3.2	3.2	3.2	100.24	0	8.7686	156820000	1	E2RL65	E2RL65
0	0	0	0	0	0				4	2	2	23.3	8.3	8.3	23.436	0	12.862	617870000	2	E2RLB2	E2RLB2
0	0	0	0	0	0				1	1	1	4.3	4.3	4.3	46.242	0	12.199	49908000	1	E2RLP1	E2RLP1
0	0	0	0	0	0				2	2	2	7.1	7.1	7.1	56.188	0	15.669	134150000	2	E2RLY5	E2RLY5
0	0	0	0	0	0				2	2	2	6	6	6	52.352	0	15.014	471140000	2	E2RMI1;E2RMI3;J9NZI9;E2RCE3	E2RMI1;E2RMI3;J9NZI9;E2RCE3
0	0	0	0	0	0				1	1	1	3	3	3	51.079	0.0025295	6.383	184350000	1	E2RMK6	E2RMK6
0	0	0	0	0	0				1	1	1	8.3	8.3	8.3	25.541	0.0040683	6.008	152530000	1	E2RN02	E2RN02
0	0	0	0	0	0				1	1	1	2.5	2.5	2.5	49.905	0.00086133	6.5919	31995000	1	E2RN45	E2RN45
0	0	0	0	0	0				1	1	1	5.2	5.2	5.2	19.888	0.0017036	6.4871	138800000	1	E2RNC5	E2RNC5
0	0	0	0	0	0				1	1	1	1.7	1.7	1.7	84.805	0	7.119	93352000	1	J9JHA9;E2RNY1	J9JHA9;E2RNY1
0	0	0	0	0	0				2	2	2	2.6	2.6	2.6	91.411	0	11.347	301040000	2	E2RPG3	E2RPG3
0	0	0	0	0	0				1	1	1	0.8	0.8	0.8	125.39	0.0087789	5.8264	5659900	1	E2RPS3	E2RPS3
0	0	0	0	0	0				1	1	1	11.6	11.6	11.6	27.737	0	9.0148	106880000	1	E2RQG8	E2RQG8
0	0	0	0	0	0				3	3	3	13.2	13.2	13.2	32.099	0	34.16	597520000	3	F1PYH4;E2RRA0	F1PYH4;E2RRA0
0	0	0	0	0	0				1	1	1	1	1	1	122.36	0	7.4599	0	1	E2RRS7	E2RRS7
0	0	0	0	0	0				1	1	1	2.2	2.2	2.2	65.584	0.00087032	6.6453	2999000	1	E2RTI3	E2RTI3
0	0	0	0	0	0				1	1	1	9.1	9.1	9.1	22.392	0	7.265	242680000	1	J9NWR5;F1P631	J9NWR5;F1P631
0	0	0	0	0	0				1	1	1	0.7	0.7	0.7	156.76	0.0056315	5.9356	6198000	1	F1P660	F1P660
0	0	0	0	0	0				2	1	1	1.5	1.1	1.1	211.66	0.0016949	6.4647	50129000	1	F1P6G0;F1PKX9	F1P6G0;F1PKX9
0	0	0	0	0	0				1	1	1	5.1	5.1	5.1	26.823	0	6.9963	671220000	1	F1P7A9	F1P7A9
0	0	0	0	0	0				2	2	2	1.8	1.8	1.8	127.14	0	27.813	0	2	F1P7L9	F1P7L9
0	0	0	0	0	0				1	1	1	1.2	1.2	1.2	96.979	0.0017109	6.5014	58448000	1	F1P7M0	F1P7M0
0	0	0	0	0	0				2	2	2	5.3	5.3	5.3	62.699	0	15.281	227730000	2	F1P7V6	F1P7V6
0	0	0	0	0	0				1	1	1	1.3	1.3	1.3	148.09	0	8.7676	181850000	1	J9NZ68;F1P8A1	J9NZ68;F1P8A1
0	0	0	0	0	0				2	2	2	3.2	3.2	3.2	49.317	0	11.603	808790000	2	F1P8G0	F1P8G0
0	0	0	0	0	0				1	1	1	7.3	7.3	7.3	22.106	0	10.137	178840000	1	F1P8J8	F1P8J8
0	0	0	0	0	0				3	3	3	4.7	4.7	4.7	98.179	0	21.263	663990000	3	J9NUR9;F1P983	J9NUR9;F1P983
0	0	0	0	0	0				1	1	1	2.1	2.1	2.1	74.718	0.00087336	6.6838	91951000	1	J9NTM1;F1P9U2	J9NTM1;F1P9U2
0	0	0	0	0	0				1	1	1	1.5	1.5	1.5	80.252	0.0016978	6.4702	56517000	1	F1P9V1	F1P9V1
0	0	0	0	0	0				1	1	1	2.4	2.4	2.4	69.136	0.004075	6.0214	0	1	F1P9Z6	F1P9Z6
0	0	0	0	0	0				1	1	1	3.6	3.6	3.6	60.712	0	15.433	39796000	1	F1PB37	F1PB37
0	0	0	0	0	0				1	1	1	1.7	1.7	1.7	52.641	0	8.7478	0	1	F1PBJ4;F1PB61	F1PBJ4;F1PB61
0	0	0	0	0	0				1	1	1	1.2	1.2	1.2	133.93	0.0040984	6.0941	320960000	1	F1PBM0	F1PBM0
0	0	0	0	0	0				1	1	1	1.2	1.2	1.2	83.966	0	7.7945	0	1	F1PC15	F1PC15
0	0	0	0	0	0				1	1	1	6	6	6	36.007	0.0025381	6.4215	112470000	1	F1PCE2;J9P983	F1PCE2;J9P983
0	0	0	0	0	0				1	1	1	2.1	2.1	2.1	77.772	0.0024958	6.2899	0	1	F1PCH0	F1PCH0
0	0	0	0	0	0				3	3	3	6.5	6.5	6.5	59.922	0	24.287	525330000	3	F1PCK9	F1PCK9
0	0	0	0	0	0				1	1	1	9.2	9.2	9.2	42.228	0.0025359	6.3921	171510000	3	F1PCX9	F1PCX9
0	0	0	0	0	0				1	1	1	4.7	4.7	4.7	38.17	0.0017065	6.4905	4735300	1	F1PD54	F1PD54
0	0	0	0	0	0				1	1	1	5	5	5	29.207	0.0017153	6.5139	142180000	1	F1PDF1	F1PDF1
0	0	0	0	0	0				2	2	2	2.7	2.7	2.7	97.607	0	16.503	93470000	2	F1PEF0	F1PEF0
0	0	0	0	0	0				1	1	1	1.4	1.4	1.4	91.081	0	12.462	9416100	1	O77704;J9P6A9;F1PEF1	O77704;J9P6A9;F1PEF1
0	0	0	0	0	0				2	2	2	2.5	2.5	2.5	131.53	0	31.072	206300000	2	F1PF03	F1PF03
0	0	0	0	0	0				1	1	1	5.4	5.4	5.4	40.085	0	9.379	120180000	1	J9NRP8;F1PFK0	J9NRP8;F1PFK0
0	0	0	0	0	0				2	2	2	4.9	4.9	4.9	50.505	0	14.492	103950000	2	F1PFN8	F1PFN8
0	0	0	0	0	0				1	1	1	2	2	2	75.447	0.0025253	6.3686	24669000	1	F1PFR2	F1PFR2
0	0	0	0	0	0				1	1	1	0.9	0.9	0.9	198.29	0	7.3673	6887300	1	F1PGD5	F1PGD5
0	0	0	0	0	0				2	2	2	11.9	11.9	11.9	24.738	0	13.751	116580000	2	F1PGP3	F1PGP3
0	0	0	0	0	0				1	1	1	3.2	3.2	3.2	30.644	0.008758	5.7941	179920000	1	F1PGY6	F1PGY6
0	0	0	0	0	0				2	2	1	1	1	0.5	220.57	0	11.977	182130000	2	F1PHZ1	F1PHZ1
0	0	0	0	0	0				1	1	1	3.8	3.8	3.8	49.295	0	8.8043	139230000	1	F1PI83;F1Q1Q9	F1PI83;F1Q1Q9
0	0	0	0	0	0				1	1	1	3.2	3.2	3.2	27.893	0.003314	6.2516	247070000	1	F1PK63	F1PK63
0	0	0	0	0	0				1	1	1	1.7	1.7	1.7	59.65	0.00087413	6.6954	157260000	1	F1PKV2	F1PKV2
0	0	0	0	0	0				1	1	1	0.9	0.9	0.9	292.48	0	9.7539	62335000	1	J9P5A2;F1PLY1	J9P5A2;F1PLY1
0	0	0	0	0	0				1	1	1	0.7	0.7	0.7	194.39	0.0025042	6.3101	19230000	1	F1PMA1;J9PAE7	F1PMA1;J9PAE7
0	0	0	0	0	0				1	1	1	12.1	12.1	12.1	24.504	0	17.018	68587000	1	J9P444;F1PMA2	J9P444;F1PMA2
0	0	0	0	0	0				1	1	1	0.5	0.5	0.5	322.52	0.0025021	6.3093	17277000	1	J9PAA8;F1PN38	J9PAA8;F1PN38
0	0	0	0	0	0				1	1	1	1.1	1.1	1.1	128.89	0	8.2777	0	1	F1PN76	F1PN76
0	0	0	0	0	0				1	1	1	2.6	2.6	2.6	39.101	0.004095	6.0852	0	1	F1PNS2	F1PNS2
0	0	0	0	0	0				1	1	1	0.8	0.8	0.8	130.51	0	7.1288	22625000	1	F1PP33;J9NUT8	F1PP33;J9NUT8
0	0	0	0	0	0				2	2	2	5.6	5.6	5.6	47.079	0	10.871	364530000	2	F1PPL5	F1PPL5
0	0	0	0	0	0				1	1	1	2.9	2.9	2.9	52.996	0.0040917	6.0629	23262000	1	F1PPR8	F1PPR8
0	0	0	0	0	0				3	3	3	3.7	3.7	3.7	100.63	0	17.722	314010000	3	F1PQ46;J9NZU1	F1PQ46;J9NZU1
0	0	0	0	0	0				4	4	4	8.5	8.5	8.5	49.602	0	25.46	1227500000	4	F1PQ79	F1PQ79
0	0	0	0	0	0				1	1	1	4.5	4.5	4.5	40.675	0	10.25	168290000	1	F1PRW0	F1PRW0
0	0	0	0	0	0				1	1	1	4	4	4	33.851	0.00086505	6.6137	334850000	1	J9P2E3;F1PS26	J9P2E3;F1PS26
0	0	0	0	0	0				1	1	1	2.7	2.7	2.7	42.282	0.0041118	6.1221	0	1	F1PSR7;J9NYP8	F1PSR7;J9NYP8
0	0	0	0	0	0				2	2	2	8.5	8.5	8.5	46.977	0	17.532	355370000	2	F1PU61	F1PU61
0	0	0	0	0	0				1	1	1	3.9	3.9	3.9	62.995	0	9.728	0	1	M1VEJ1;M1VKT6;M1VRR0;F1PU73;M1VPL1	M1VEJ1;M1VKT6;M1VRR0;F1PU73;M1VPL1
0	0	0	0	0	0				3	3	3	4.2	4.2	4.2	91.267	0	18.465	996080000	3	F1PUE0;Q9XT65	F1PUE0
0	0	0	0	0	0				3	3	3	4.9	4.9	4.9	55.89	0	17.624	629930000	3	F1PUE2	F1PUE2
0	0	0	0	0	0				1	1	1	1.5	1.5	1.5	64.684	0.00088339	6.7757	181380000	1	F1PUL4	F1PUL4
0	0	0	0	0	0				1	1	1	1.3	1.3	1.3	145.23	0	11.787	0	1	F1PUU4;J9P2Y3	F1PUU4;J9P2Y3
0	0	0	0	0	0				2	2	2	5.9	5.9	5.9	78.215	0	18.527	251850000	2	F1PV60;I4IY07	F1PV60;I4IY07
0	0	0	0	0	0				1	1	1	1.8	1.8	1.8	92.008	0	6.9276	60485000	1	F1PVB6;J9NRF6	F1PVB6;J9NRF6
0	0	0	0	0	0				2	2	2	7	7	7	49.206	0	13.493	560590000	2	F1PVE5;E2RA71;J9P4P7	F1PVE5;E2RA71;J9P4P7
0	0	0	0	0	0				6	1	1	37.9	8.4	8.4	22.313	0	8.7264	46585000	1	F1PVP9	F1PVP9
0	0	0	0	0	0				1	1	1	3	3	3	74.495	0	9.297	141440000	1	F1PWE3	F1PWE3
0	0	0	0	0	0				1	1	1	1.6	1.6	1.6	55.401	0	7.0022	0	1	F1PWE6	F1PWE6
0	0	0	0	0	0				1	1	1	2	2	2	79.941	0	9.9181	131700000	1	F1PY49	F1PY49
0	0	0	0	0	0				1	1	1	4.1	4.1	4.1	31.485	0.0040816	6.0431	928550000	1	F1PZK6	F1PZK6
0	0	0	0	0	0				2	2	2	2.1	2.1	2.1	97.327	0	11.697	473680000	2	F1PZL7;F1PRW7	F1PZL7;F1PRW7
0	0	0	0	0	0				1	1	1	5.1	5.1	5.1	34.242	0	7.3584	49563000	1	F1PZW8	F1PZW8
0	0	0	0	0	0				1	1	1	11.7	11.7	11.7	12.352	0	12.383	103220000	1	F1Q0L5	F1Q0L5
0	0	0	0	0	0				1	1	1	2.2	2.2	2.2	64.602	0.005627	5.9207	19469000	1	F1Q1C5;J9P393	F1Q1C5;J9P393
0	0	0	0	0	0				1	1	1	6.1	6.1	6.1	32.171	0	7.1828	94310000	1	F1Q237	F1Q237
0	0	0	0	0	0				1	1	1	1.2	1.2	1.2	88.065	0	6.8772	24418000	1	F1Q284	F1Q284
0	0	0	0	0	0				1	1	1	4.2	4.2	4.2	81.029	0.00088183	6.7524	30747000	1	F1Q2J2	F1Q2J2
0	0	0	0	0	0				1	1	1	4.6	4.6	4.6	48.399	0	10.067	26787000	1	F1Q2X2;J9NXW0	F1Q2X2;J9NXW0
0	0	0	0	0	0				2	2	2	8.6	8.6	8.6	29.385	0	25.876	186940000	2	F1Q385;J9P0W4	F1Q385;J9P0W4
0	0	0	0	0	0				1	1	1	2.4	2.4	2.4	50.023	0.00088574	6.8145	90652000	1	F1Q4F5	F1Q4F5
0	0	0	0	0	0				1	1	1	1.4	1.4	1.4	78.738	0.0025274	6.3714	0	1	F6UZY1	F6UZY1
0	0	0	0	0	0				1	1	1	0.3	0.3	0.3	433.94	0	9.5367	0	1	F6V7F8	F6V7F8
0	0	0	0	0	0				1	1	1	6.4	6.4	6.4	34.281	0	9.52	0	1	F6V9G5	F6V9G5
0	0	0	0	0	0				1	1	1	0.5	0.5	0.5	243.72	0.0048583	5.9667	4394000	1	F6XBJ5	F6XBJ5
0	0	0	0	0	0				1	1	1	1.8	1.8	1.8	105	0	13.83	0	1	F6XGU5	F6XGU5
0	0	0	0	0	0				1	1	1	11.4	11.4	11.4	19.716	0	13.66	36484000	1	F6XHA7	F6XHA7
0	0	0	0	0	0				2	2	2	3.1	3.1	3.1	66.284	0	11.273	128610000	2	F6XQ20	F6XQ20
0	0	0	0	0	0				2	2	2	1.1	1.1	1.1	281.17	0	39.27	205780000	2	F6XQD6	F6XQD6
0	0	0	0	0	0				1	1	1	1.9	1.9	1.9	58.015	0.0080192	5.8874	60565000	1	F6XRK3	F6XRK3
0	0	0	0	0	0				1	1	1	2.1	2.1	2.1	93.77	0.00086356	6.6096	65917000	1	F6XXQ6;F6XYC2	F6XXQ6;F6XYC2
0	0	0	0	0	0				1	1	1	0.7	0.7	0.7	219.39	0.0041017	6.095	122410000	1	J9P992;F6Y037	J9P992;F6Y037
0	0	0	0	0	0				2	1	1	2.1	1.4	1.4	93.718	0.0087649	5.7981	110130000	1	G1K296	G1K296
0	0	0	0	0	0				1	1	1	20.5	20.5	20.5	5.1427	0.0017021	6.4862	47897000	1	Q9XT64;G1K299	Q9XT64;G1K299
0	0	0	0	0	0				1	1	1	4.4	4.4	4.4	20.646	0.0024979	6.3057	515770000	1	J9NTY9;J9JHF3;J9P910;H9GW57;H9GW58	J9NTY9;J9JHF3;J9P910;H9GW57;H9GW58
0	0	0	0	0	0				1	1	1	3.6	3.6	3.6	37.53	0.0048504	5.9517	487050000	1	H9GW87	H9GW87
0	0	0	0	0	0				2	2	2	5.2	5.2	5.2	33.538	0	10.633	370380000	2	H9GWE2	H9GWE2
0	0	0	0	0	0				1	1	1	10.9	10.9	10.9	20.825	0	9.967	79441000	1	J9NRV6	J9NRV6
0	0	0	0	0	0				1	1	1	26.7	26.7	26.7	11.068	0	10.327	199110000	1	J9NS50	J9NS50
0	0	0	0	0	0				1	1	1	12.4	12.4	12.4	16.925	0.0025402	6.4593	478600000	1	J9NTI3	J9NTI3
0	0	0	0	0	0				1	1	1	2.1	2.1	2.1	51.946	0	16.636	0	1	J9NU25	J9NU25
0	0	0	0	0	0				1	1	1	5.2	5.2	5.2	26.038	0.0033058	6.2206	111940000	1	J9NUG1	J9NUG1
0	0	0	0	0	0				1	1	1	6	6	6	32.327	0.004085	6.0498	182380000	1	J9NWQ3	J9NWQ3
0	0	0	0	0	0				1	1	1	1.3	1.3	1.3	89.13	0	7.2196	14505000	1	J9NXR3	J9NXR3
0	0	0	0	0	0				1	1	1	5.4	5.4	5.4	27.872	0.0025189	6.349	5570500	1	J9P492	J9P492
0	0	0	0	0	0				1	1	1	2.9	2.9	2.9	30.244	0.0087859	5.8314	104960000	1	J9P7W8	J9P7W8
0	0	0	0	0	0				1	1	1	5.3	5.3	5.3	35.407	0	8.2649	62310000	1	J9PA46	J9PA46
0	0	0	0	0	0				1	1	1	0.9	0.9	0.9	180.96	0	8.1312	31846000	1	J9PAU4	J9PAU4
0	0	0	0	0	0				2	2	2	3.2	3.2	3.2	92.256	0	16.049	870280000	2	Q2Q423	Q2Q423
0	0	0	0	0	0		+		1	1	1	0	0	0	75.721	0.0064257	5.9138	227460000	1	REV__F1PNQ8	REV__F1PNQ8
